# Supplementary material for: Estimating need and coverage for five priority assistive products: a systematic review of global population-based research
Source: PubMed Central journal article supplement — BMJ Glob Health. 2022 Jan 31;7(1):e007662. doi: 10.1136/bmjgh-2021-007662 (PMC8804659; doi:10.1136/bmjgh-2021-007662), 2022-01-31

## Appendix

### 1. Appendix 1: Databases searched March 31, 2020

|                      | Database(s)                                                                                                                                                                                            |
|----------------------|--------------------------------------------------------------------------------------------------------------------------------------------------------------------------------------------------------|
| Ovid                 | MEDLINE, EMBASE, AMED, Global Health, PSYCHInfo                                                                                                                                                        |
| Global Index Medicus | African Index Medicus, Latin American and Caribbean Health Sciences Literature, Index Medicus Eastern Mediterranean Region, Index Medicus South East Asia Region, Western Pacific Region Index Medicus |
|                      | CINAHL Plus                                                                                                                                                                                            |
|                      | Cochrane Database of Systematic Reviews                                                                                                                                                                |
|                      | Science Direct                                                                                                                                                                                         |
|                      | OpenGrey                                                                                                                                                                                               |
|                      | Grey Literature Report                                                                                                                                                                                 |

### 2. Appendix 2: Systematic Search String

|     | Parameter                                                                                                                         |
|-----|-----------------------------------------------------------------------------------------------------------------------------------|
|     | ((assistive OR accessible Or inclusive Or adaptive OR self?help) AND (tech* OR product\$ OR device\$ OR software))                |
| OR  | (aid OR wheelchair\$ OR hearing?aid OR prosth* OR glasses OR spectacle\$ OR eyeglasses OR PDA\$ OR "personal digital assistant?") |
| AND | (coverage OR unmet OR under?met OR need OR prevalence OR distribution OR provision or suppl* OR demand)                           |
| AND | (impair* OR disab* OR functi* limit* OR limit* functi* OR correct* OR uncorrect*)                                                 |
|     | .ab,ti                                                                                                                            |

### 3. Appendix 3: Full data extraction details

|              | Details                                                                                                                                                                                                        |
|--------------|----------------------------------------------------------------------------------------------------------------------------------------------------------------------------------------------------------------|
| Publication  | Authors, year of publication                                                                                                                                                                                   |
| Setting      | Data collection dates, geography (to the smallest scale provided), WHO region                                                                                                                                  |
| Population   | N included, age range                                                                                                                                                                                          |
| Methodology  | Study design, sampling frame, sampling strategy                                                                                                                                                                |
| Assessment   | Assessment approach(es), survey/tool/dataset name (if applicable), APs included, definition(s)/threshold(s) for functional difficulty                                                                          |
| Results      | AP indicator definition provided in text, corresponding AP indicator definition in review, AP indicator value (numerator, denominator, proportion, confidence intervals, weighted), other variables stratified |
| Risk of Bias | Overall Joanna Briggs Institute (JBI) Score, checklist items missed                                                                                                                                            |

### 4. Appendix 4: An example of indirectly extracting AP indicators.

A study may report glasses coverage as 30%, because 30 of 100 total participants reported using glasses. By our definition, this would actually be an indicator of 'use', which is how we would extract and report it. However, if the study further specifies that of these 30, 20 had 'normal vision' when using their glasses and 10 had an outdated prescription, and of the 70 without glasses, 25 would benefit from having them prescribed, these data would indirectly inform other AP indicators. Using our terms and definitions out of the total population, we can therefore extract and report the met need for this study at 20%, the under-met need at 10%, and the unmet need at 25%. This demonstrates a total need of 55% and allows the calculation of coverage by our definition as met need (20) divided by total need (55), or 36.4%.

### 5. Appendix 5: Adapted Joanna Briggs Institute Checklist for Prevalence Studies & Common reasons for missing each

| Checklist Item*                                                      | Common reasons for missing                                                                                                     |
|----------------------------------------------------------------------|--------------------------------------------------------------------------------------------------------------------------------|
| 1 Was the sample frame appropriate to address the target population? | The sample frame is not described; the sampling frame is not suitable to get a representative sample of the target population. |

|                                                                                                                                                                                                                                                                                                                                                                                                                        |                                                                                              |                                                                                                                                                                 |
|------------------------------------------------------------------------------------------------------------------------------------------------------------------------------------------------------------------------------------------------------------------------------------------------------------------------------------------------------------------------------------------------------------------------|----------------------------------------------------------------------------------------------|-----------------------------------------------------------------------------------------------------------------------------------------------------------------|
| 2                                                                                                                                                                                                                                                                                                                                                                                                                      | Were study participants sampled in an appropriate way?                                       | The sampling strategy is not described; non-random sampling method used.                                                                                        |
| 3                                                                                                                                                                                                                                                                                                                                                                                                                      | Was the sample size adequate?                                                                | No sample size calculation was demonstrated if presenting significance measures.                                                                                |
| 4                                                                                                                                                                                                                                                                                                                                                                                                                      | Were the study subjects and the setting described in detail?                                 | Locations within a country were not provided; study dates were not provided or specified other than years; age inclusion limitations were not provided.         |
| 5                                                                                                                                                                                                                                                                                                                                                                                                                      | Was the data analysis conducted with sufficient coverage of the identified sample?           | A substantial portion of those eligible for inclusion in the analysis were not due to incomplete data.                                                          |
| 6                                                                                                                                                                                                                                                                                                                                                                                                                      | Were valid methods used for the identification of the condition?                             | Impairment definition unclear; threshold for classifying AP need unclear.                                                                                       |
| 7                                                                                                                                                                                                                                                                                                                                                                                                                      | Was the condition measured in a standard, reliable way for all participants?                 | The assessment approach used was not validated elsewhere.                                                                                                       |
| 8                                                                                                                                                                                                                                                                                                                                                                                                                      | Was there appropriate statistical analysis?                                                  | AP indicator calculations unclear and not possible to replicate with information provided; discrepancies/errors between results reported in tables and in text. |
| 9                                                                                                                                                                                                                                                                                                                                                                                                                      | Was the response rate adequate, and if not, was the low response rate managed appropriately? | The response rate was below 80% and no demographic description, follow-up of non-participants, or adjustment to the study method was undertaken.                |
| 10**                                                                                                                                                                                                                                                                                                                                                                                                                   | Was consent obtained from/for all participants and ethical guidelines followed?              | Consent and ethics were not mentioned in the study.                                                                                                             |
| <p><i>*To assess the risk of bias in primary studies that used a pre-established method protocol, or secondary analyses that did not include all primary study details, the study needed to cite the original record providing full details. The score was otherwise lowered for every missing checklist item.</i></p> <p><i>** The 10<sup>th</sup> item was added to the standard JBI list by review authors.</i></p> |                                                                                              |                                                                                                                                                                 |

## 6. Appendix 6: Studies excluded during full-text review

|    | Author(s)                                                                                                                               | Title                                                                                                                                                                                    | Publish date | Reason for excl.                    |
|----|-----------------------------------------------------------------------------------------------------------------------------------------|------------------------------------------------------------------------------------------------------------------------------------------------------------------------------------------|--------------|-------------------------------------|
| 1  | Davis, A. and Smith, P. and Ferguson, M. and Stephens, D. and Gianopoulos, I.                                                           | Acceptability, benefit and costs of early screening for hearing disability: A study of potential screening tests and models                                                              | 2007         | Data collected before 2000          |
| 2  | Contepomi, S.                                                                                                                           | Access to appropriate assistive technology in less-resourced settings: Argentina's case                                                                                                  | 2019         | Not population-based/representative |
| 3  | Silver, E. J. and Stein, R. E.                                                                                                          | Access to care, unmet health needs, and poverty status among children with and without chronic conditions                                                                                | 2001         | Data collected before 2000          |
| 4  | Adinanto, F. and French, A. and Rose, K. A.                                                                                             | Access to eye care services by schoolchildren in a longitudinal cohort                                                                                                                   | 2019         | Full text not available             |
| 5  | Mauricio III, M; Bundoc, J; et al.                                                                                                      | Accessible Centers for Children for Empowerment and Sustainable Services: Service delivery models for children with disabilities within 7,100 islands of the Philippine archipelago      | 2019         | No new AP indicator                 |
| 6  | DeCarlo, D. K. and Swanson, M. and McGwin, G. and Visscher, K. and Owsley, C.                                                           | ADHD and Vision Problems in the National Survey of Children's Health                                                                                                                     | 2016         | No new AP indicator                 |
| 7  | TÅndel, Gunhild                                                                                                                         | Administrating disability: The case of "assistance need" registration in Norwegian health and care governance                                                                            | 2009         | No new AP indicator                 |
| 8  | Al-Ghamdi, Abdulhamid S.                                                                                                                | Adults visual impairment and blindness – An overview of prevalence and causes in Saudi Arabia                                                                                            | 2019         | No new AP indicator                 |
| 9  | Ching, Teresa Y. C. and Oong, Ron and van Wanrooy, Emma                                                                                 | ages of intervention in regions with and without universal newborn hearing screening and prevalence of childhood hearing impairment in Australia                                         | 2006         | Not population-based/representative |
| 10 | Carden, Susan M.                                                                                                                        | Analysis of the National Health and Nutrition Examination Survey: Prevalence of Visual Impairment in the United States, by S Vitale, MF Cotch, and RD Sperduto. JAMA 295:2158â€³63, 2006 | 2006         | Full text not available             |
| 11 | Loeb, Mitchell E. and Eide, Arne H. and Mont, Daniel                                                                                    | Approaching the measurement of disability prevalence: The case of Zambia                                                                                                                 | 2008         | No new AP indicator                 |
| 12 | Ramke, J. and Brian, G.                                                                                                                 | Are readymade spectacles sufficient in developing countries?                                                                                                                             | 2009         | Not population-based/representative |
| 13 | Pressler, K. A. and Ferraro, K. F.                                                                                                      | Assistive device use as a dynamic acquisition process in later life                                                                                                                      | 2010         | No new AP indicator                 |
| 14 | Dimitra Panteli, Cornelia Henschke, Madelon Kroneman, Sabine Fuchs, Maximilien Hjortland, Giovanni Oliva, Ewout van Ginneken            | Assistive Devices: Regulation and Coverage in five European Countries                                                                                                                    | 2018         | No new AP indicator                 |
| 15 | Nihei, M. and Sugawara, I. and Ehara, N. and Gondo, Y. and Masui, Y. and Inagaki, H. and Inoue, T. and MacLachlan, M. and McAuliffe, E. | Assistive products use among oldest-old people in Japan: Differences in personal attributes and living situation                                                                         | Missing      | Full text not available             |
| 16 | Wallace, Joseph                                                                                                                         | Assistive technology funding in the United States                                                                                                                                        | 2011         | Full text not available             |
| 17 | Kitchener, Martin and Ng, Terence and Lee, Hyang Yuol and Harrington, Charlene                                                          | Assistive technology in Medicaid home- and community-based waiver programs                                                                                                               | 2008         | Not population-based/representative |
| 18 | Orellano-ColÅn, Elsa M. and Rivero-MÅndez, Marta and Lizama, Mauricio and Jutai, Jeffrey W.                                             | Assistive technology unmet needs of independent living older Hispanics with functional limitations                                                                                       | 2018         | Not population-based/representative |
| 19 | Claya, Shondra Loggins; Alston, Reginald;                                                                                               | Assistive technology use and veterans: An examination of racial differences between Whites and Blacks using the HAAT model                                                               | 2016         | Full text not available             |
| 20 | Khandaker, G.; Karim, T.; Muhit, M.; Smitherssheedy, H.; Jones, C.; Novak, I.; Badawi, N.;                                              | Associated impairments among children with cerebral palsy in rural Bangladesh: Findings from the Bangladesh Cerebral Palsy Register (BCPR)                                               | 2017         | No new AP indicator                 |
| 21 | Khoury, A. J. and Hall, A. and Andresen, E. and Zhang, J. and Ward, R. and Jarjoura, C.                                                 | association between chronic disease and physical disability among female Medicaid beneficiaries 18-64 years of age                                                                       | 2013         | Not population-based/representative |
| 22 | Nathan G Congdon, Nita Patel, Paul Estes, Florence Chikwembani, Fiona Webber, Robert Bongji Msithini, Amy Ratcliffe                     | association between refractive cutoffs for spectacle provision and visual improvement among school-aged children in South Africa                                                         | 2008         | Not population-based/representative |
| 23 | Gajapati, C. V. and Pradeep, A. V. and Kakhandaki, A. and Praveenchandra, R. K. and Rao, S.                                             | Awareness of presbyopia among rural female population in North Kamataka                                                                                                                  | 2017         | Not population-based/representative |
| 24 | Clay, S. L. and Alston, R.                                                                                                              | benefits of assistive technology use by persons with physical conditions: An examination of difficulty levels in areas of functioning                                                    | 2016         | Full text not available             |
| 25 | Finger, Robert P. and Bertram, Bernd and Wolfram, Christian and Holz, Frank G.                                                          | Blindness and visual impairment in Germany: a slight fall in prevalence                                                                                                                  | 2012         | No new AP indicator                 |
| 26 | Lim, M. and Jung, S.                                                                                                                    | Brief Introduction of Assistive Technology Service Delivery System in Republic of Korea                                                                                                  | 2015         | Full text not available             |
| 27 | Mather, H. and Kelley, A. and Bollens-Lund,                                                                                             | Can administrative claims be used to identify people with                                                                                                                                | 2018         | No new AP indicator                 |

|    |                                                                                                                                                                                                                                                                                                                                                                                                                                                                                                                                                                                                                                                                                                                                                                                                                                                                                                                                        |                                                                                                                                                         |      |                                     |
|----|----------------------------------------------------------------------------------------------------------------------------------------------------------------------------------------------------------------------------------------------------------------------------------------------------------------------------------------------------------------------------------------------------------------------------------------------------------------------------------------------------------------------------------------------------------------------------------------------------------------------------------------------------------------------------------------------------------------------------------------------------------------------------------------------------------------------------------------------------------------------------------------------------------------------------------------|---------------------------------------------------------------------------------------------------------------------------------------------------------|------|-------------------------------------|
|    | E.                                                                                                                                                                                                                                                                                                                                                                                                                                                                                                                                                                                                                                                                                                                                                                                                                                                                                                                                     | functional limitation? An exploration of candidate predictors in a sample of medicare beneficiaries                                                     |      |                                     |
| 28 | Shah, M. and Khan, M. and Khan, M. T. and Khan, M. Y. and Saeed, N.                                                                                                                                                                                                                                                                                                                                                                                                                                                                                                                                                                                                                                                                                                                                                                                                                                                                    | Causes of visual impairment in children with low vision                                                                                                 | 2011 | Not population-based/representative |
| 29 | Trani, Jean-François; Bakhshi, Parul;                                                                                                                                                                                                                                                                                                                                                                                                                                                                                                                                                                                                                                                                                                                                                                                                                                                                                                  | Challenges for assessing disability prevalence: The case of Afghanistan                                                                                 | 2006 | No new AP indicator                 |
| 30 | Mehrotra, R. and Srivastava, P. and Kumar, A.                                                                                                                                                                                                                                                                                                                                                                                                                                                                                                                                                                                                                                                                                                                                                                                                                                                                                          | Changing lives of hearing impaired patients in rural north india through concept of trained ear care workers with the vision of hearing for all by 2030 | 2016 | Full text not available             |
| 31 | Kang, M. T. and Li, S. and Congdon, N. G. and Jan, C. and Wang, N.                                                                                                                                                                                                                                                                                                                                                                                                                                                                                                                                                                                                                                                                                                                                                                                                                                                                     | Characteristics of Pseudomyopia and Spectacles wearing in Chinese Children                                                                              | 2018 | Full text not available             |
| 32 | Sun, L. and Arshad, J. and Daboul, L. and Young, L. and Choi, H.                                                                                                                                                                                                                                                                                                                                                                                                                                                                                                                                                                                                                                                                                                                                                                                                                                                                       | Characterizing ocular needs and distribution of corrective lenses in two Peruvian communities                                                           | 2018 | Full text not available             |
| 33 | Dhivya Ramasamy 1 , Sanil Joseph, Vijayakumar Valaguru, Vinod P Mitta, Thulasiraj D Ravilla, Mary Frances Cotch                                                                                                                                                                                                                                                                                                                                                                                                                                                                                                                                                                                                                                                                                                                                                                                                                        | Cluster Randomized Trial to Compare Spectacle Delivery Systems at Outreach Eye Camps in South India                                                     | 2013 | No new AP indicator                 |
| 34 | Steven L Barnett 1 , Kelly A Matthews 2 , Erika J Sutter 2 , Lori A DeWindt 2 , Jacqueline A Pransky 2 , Amanda M O'Hearn 2 , Tamala M David 2 , Robert Q Pollard 3 , Vincent J Samar 3 , Thomas A Pearson                                                                                                                                                                                                                                                                                                                                                                                                                                                                                                                                                                                                                                                                                                                             | Collaboration With Deaf Communities to Conduct Accessible Health Surveillance                                                                           | 2017 | No new AP indicator                 |
| 35 | Kasemsiri, P.; Yimtae, K.; Thanawirattananit, P.; Laoharsiriwong, S.; Siripaopradith, P.; Kingkaew, P.;                                                                                                                                                                                                                                                                                                                                                                                                                                                                                                                                                                                                                                                                                                                                                                                                                                | Community-Based Hearing Screening of Disabled Elders Using the Thai-FMHT: Clinical Implications and Cost-Effectiveness                                  | 2015 | Full text not available             |
| 36 | Seymour, N.                                                                                                                                                                                                                                                                                                                                                                                                                                                                                                                                                                                                                                                                                                                                                                                                                                                                                                                            | Community-based rehabilitation workers' role in wheelchair service provision                                                                            | 2019 | Not population-based/representative |
| 37 | Lauer, Eric A. and Henly, Megan and Coleman, Rachel                                                                                                                                                                                                                                                                                                                                                                                                                                                                                                                                                                                                                                                                                                                                                                                                                                                                                    | Comparing estimates of disability prevalence using federal and international disability measures in national surveillance                               | 2019 | No new AP indicator                 |
| 38 | Miller, J. M. and Dobson, V. and Harvey, E. M. and Sherrill, D. L.                                                                                                                                                                                                                                                                                                                                                                                                                                                                                                                                                                                                                                                                                                                                                                                                                                                                     | Comparison of preschool vision screening methods in a population with a high prevalence of astigmatism                                                  | 2001 | Not population-based/representative |
| 39 | Morjaria, P. and McCormick, I. and Gilbert, C.                                                                                                                                                                                                                                                                                                                                                                                                                                                                                                                                                                                                                                                                                                                                                                                                                                                                                         | Compliance and Predictors of Spectacle Wear in Schoolchildren and Reasons for Non-Wear: A Review of the Literature                                      | 2019 | No new AP indicator                 |
| 40 | Evans, B. J. W.; Rowlands, G.;                                                                                                                                                                                                                                                                                                                                                                                                                                                                                                                                                                                                                                                                                                                                                                                                                                                                                                         | Correctable visual impairment in older people: A major unmet need                                                                                       | 2004 | Not population-based/representative |
| 41 | Esteso, P. and Castanon, A. and Toledo, S. and Pereyra Rito, M. A. and Ervin, A. and Wojciechowski, R. and Congdon, N. G.                                                                                                                                                                                                                                                                                                                                                                                                                                                                                                                                                                                                                                                                                                                                                                                                              | Correction of moderate myopia is associated with improvement in self-reported visual functioning among Mexican school-aged children                     | 2007 | Not population-based/representative |
| 42 | Maini, R. and Keefe, J. and Weih, L. A. and McCarty, C. A. and Taylor, H. R.                                                                                                                                                                                                                                                                                                                                                                                                                                                                                                                                                                                                                                                                                                                                                                                                                                                           | Correction of refractive error in the Victorian population: the feasibility of "off the shelf" spectacles                                               | 2001 | Data collected before 2000          |
| 43 | Baltussen, R.; Abraham, V. J.; Monica, Priya; Balraj, Achamma; Job, Anand; Norman, Gift; Joseph, Abraham;                                                                                                                                                                                                                                                                                                                                                                                                                                                                                                                                                                                                                                                                                                                                                                                                                              | Costs and health effects of screening and delivery of hearing aids in Tamil Nadu, India: an observational study                                         | 2009 | Not population-based/representative |
| 44 | Li, L. and Guan, H. J. and Zhou, J. B. and Shi, H. H. and Xun, P. C. and Gu, H. Y. and Xie, Z. G. and Chen, Q. J. and Sun, J. Q.                                                                                                                                                                                                                                                                                                                                                                                                                                                                                                                                                                                                                                                                                                                                                                                                       | cross-sectional survey of blindness and low vision among adults aged 60 years and above in Xinchengqiao Blocks, Nantong                                 | 2006 | Full text not available             |
| 45 | Al Allaf, A. M. Y.; Ali, A.; Muneer, M.;                                                                                                                                                                                                                                                                                                                                                                                                                                                                                                                                                                                                                                                                                                                                                                                                                                                                                               | Deafness in children and the need for cochlear implants                                                                                                 | 2003 | Full text not available             |
| 46 | Delcourt, Cécile and Le Goff, MÃlanie and von Hanno, Therese and Mirshahi, Alireza and Khawaja, Anthony P. and Verhoeven, Virginie J. M. and Hogg, Ruth E. and Anastosopoulos, Eleftherios and Cachulo, Maria Luz and HÃhn, RenÃ and Wolfram, Christian and Bron, Alain and Miotto, Stefania and CarriÃ're, Isabelle and Colijn, Johanna M. and Buitendijk, GabriÃlle H. S. and Evans, Jennifer and Nitsch, Dorothea and Founti, Panayiota and Yip, Jennifer L. Y. and Pfeiffer, Norbert and Creuzot-Garcher, Catherine and Silva, Rufino and Piermarocchi, Stefano and Topouzis, Fotis and Bertelsen, Geir and Foster, Paul J. and Fletcher, Astrid and Klaver, Caroline C. W. and Korobelnik, Jean-Francois and Acar, Niyazi and Anastosopoulos, Eleftherios and Azuara-Blanco, Augusto and Berendschot, Tos and Bergen, Arthur and Bertelsen, Geir and Binquet, Christine and Bird, Alan and Bobak, Martin and Boon, Camiel, et al. | Decreasing Prevalence of Nonrefractive Visual Impairment in Older Europeans: A Meta-analysis of Published and Unpublished Data                          | 2018 | No new AP indicator                 |
| 47 | Vignier, N. and Ravaud, J. F. and Winance, M. and Lepoutre, F. X. and Ville, I.                                                                                                                                                                                                                                                                                                                                                                                                                                                                                                                                                                                                                                                                                                                                                                                                                                                        | Demographics of wheelchair users in France: Results of national community-based handicaps-incapacites-dependance surveys                                | 2008 | Data collected before 2000          |

|    |                                                                                                                                                                                                                                                                                              |                                                                                                                                                                             |      |                                     |
|----|----------------------------------------------------------------------------------------------------------------------------------------------------------------------------------------------------------------------------------------------------------------------------------------------|-----------------------------------------------------------------------------------------------------------------------------------------------------------------------------|------|-------------------------------------|
| 48 | Clay, Shondra Loggins and Alston, Reginald                                                                                                                                                                                                                                                   | Difference in utilization of assistive technology across two racial groups in the aging population                                                                          | 2018 | Full text not available             |
| 49 | Carrasquillo, O. and Lantigua, R. A. and Shea, S.                                                                                                                                                                                                                                            | Differences in functional status of Hispanic versus non-Hispanic White elders: Data from the medical expenditure panel survey                                               | 2000 | Data collected before 2000          |
| 50 | Lam, B. L.; Lee, D. J.; Zheng, D. D.; Davila, E. P.; Christ, S. L.; Arheart, K. L.;                                                                                                                                                                                                          | Disparity in prevalence of self-reported visual impairment in older adults among U.S. race-ethnic subgroups                                                                 | 2009 | No new AP indicator                 |
| 51 | Mann, W. C. and Goodall, S. and Justiss, M. D. and Tomita, M.                                                                                                                                                                                                                                | Dissatisfaction and Nontuse of Assistive Devices among Frail Elders                                                                                                         | 2002 | Not population-based/representative |
| 52 | Rosen, Perth;                                                                                                                                                                                                                                                                                | distribution strategy for driving product diversity and demand creation                                                                                                     | 2020 | No new AP indicator                 |
| 53 | Bunnag, C. and Prasansuk, S. and Nakorn, A. N. and Jareoncharsri, P. and Atipas, S. and Angsuwarangsee, T. and Tansuriyawong, P. and Thongyai, M. L. and Polpathapee, S. and Siriyananda, C. and Chongkolwatana, C. and Ungkanon, K. and Chongvisal, S. and Keskoool, P. and Tantinikorn, W. | Ear diseases and hearing in the Thai elderly population. Part I. A comparative study of the accuracy of diagnosis and treatment by general practitioners vs ENT specialists | 2002 | Full text not available             |
| 54 | Lipton, B. J. and Decker, S. L.                                                                                                                                                                                                                                                              | effect of health insurance coverage on medical care utilization and health outcomes: Evidence from Medicaid adult vision benefits                                           | 2015 | No new AP indicator                 |
| 55 | Anna T Do, Krishnamurthy Ilango, Dhivya Ramasamy, Suriya Kalidasan, Vijayakumar Balakrishnan, Robert T Chang 1                                                                                                                                                                               | Effectiveness of low vision services in improving patient quality of life at Aravind Eye Hospital                                                                           | 2014 | Not population-based/representative |
| 56 | Truong, L.; Briggs, B.; Weiner, L.; Mamdani, N.; Kosoko-Lasaki, O.;                                                                                                                                                                                                                          | Effectiveness of low-cost glasses distribution in the USA, Guatemala, Ghana, Cambodia, Peru and the Dominican Republic                                                      | 2016 | Full text not available             |
| 57 | Uus, K. and Bamford, J.                                                                                                                                                                                                                                                                      | Effectiveness of population-based newborn hearing screening in England: ages of interventions and profile of cases                                                          | 2006 | No new AP indicator                 |
| 58 | Hanne Jensen, Gitte Tubæk                                                                                                                                                                                                                                                                    | Elderly people need an eye examination before entering nursing homes                                                                                                        | 2017 | Not population-based/representative |
| 59 | Zhu, Z. and He, M.                                                                                                                                                                                                                                                                           | Elimination of avoidable blindness and visual impairment due to refractive error: Who are our priorities in providing spectacles?                                           | 2017 | Full text not available             |
| 60 | Hettiarachchi, Shyamani and Subramaniam, V. and Rajah, Emil and Gowritharan, Paramaguru and Nizar, Shamra and Saleem, Shakeela                                                                                                                                                               | Enabling Access': A Pilot Study on Access and Use of Assistive Products in the Northern Province, Sri Lanka                                                                 | 2019 | Not population-based/representative |
| 61 | Wang, L. and Aili, A. and Liu, Q. and Chen, Y. and Yao, H.                                                                                                                                                                                                                                   | Epidemiological and rehabilitation analyses of patients with hearing disabilities of Uyghur and Han Chinese ethnicities in Xinjiang, China: a comparative study             | 2018 | Not population-based/representative |
| 62 | Zou, Y. H. and Ding, J. Y. and Peng, H. and Shi, J. L. and Qu, C. Y. and Liu, X. P.                                                                                                                                                                                                          | epidemiological study of visual disability and visual rehabilitation in Beijing                                                                                             | 2009 | Full text not available             |
| 63 | Pan, C. W. and Chiang, P. P. and Wong, T. Y. and Zheng, Y. F. and Chew, M. and Saw, S. M. and Lamoureux, E. L. and Cheng, C. Y.                                                                                                                                                              | Ethnic differences in undercorrected refractive error in Asians                                                                                                             | 2014 | Full text not available             |
| 64 | Chen, Nancy and Hsieh, His-Pao and Tsai, Rong-Kung and Sheu, Min-Muh                                                                                                                                                                                                                         | Eye care services for the populations of remote districts in eastern Taiwan: a practical framework using a Mobile Vision Van Unit                                           | 2015 | Not population-based/representative |
| 65 | Vela, Claudia and Samson, Elodie and Zunzunegui, Maria Victoria and Haddad, Slim and Aubin, Marie-Josée and Freeman, Ellen E.                                                                                                                                                                | Eye care utilization by older adults in low, middle, and high income countries                                                                                              | 2012 | No new AP indicator                 |
| 66 | Khalaj, Mohammad and Barikani, Ameneh and Ghasemi, Hafez                                                                                                                                                                                                                                     | Eye disorders in old people                                                                                                                                                 | 2012 | No new AP indicator                 |
| 67 | Rebecca Russ; Michael Rothschild; Jinan Saaddine; Lindsay Collin; Danny Haddad                                                                                                                                                                                                               | Eye health and access to eye care among migrant farmworkers in Georgia                                                                                                      | 2015 | Full text not available             |
| 68 | EYElliance                                                                                                                                                                                                                                                                                   | Eyeglasses for Global Development: Bridging the Visual Divide                                                                                                               | 2016 | No new AP indicator                 |
| 69 | Zhou, Z. and Ma, X. and Yi, H. and Pang, X. and Shi, Y. and Meltzer, M. and He, M. and Rozelle, S. and Morgan, I. G. and Congdon, N. G.                                                                                                                                                      | Factors underlying large differences in myopia prevalence among primary school children in adjoining provinces of western China                                             | 2014 | Full text not available             |
| 70 | Donaldson, L.A; Karas, M; O'Brien, D; Woodhouse, J.M.                                                                                                                                                                                                                                        | Findings from an opt-in eye examination service in English special schools. Is vision screening effective for this population?                                              | 2019 | Not population-based/representative |
| 71 | Bisgaard, N.; Ruf, S.;                                                                                                                                                                                                                                                                       | Findings From EuroTrak Surveys From 2009 to 2015: Hearing Loss Prevalence, Hearing Aid Adoption, and Benefits of Hearing Aid Use                                            | 2017 | Full text not available             |
| 72 | Da Silva Takitani, G. E. and Fernandes, A. and Alves, M. and De Almeida, R. C. and Nascimento, R. A. and Valdrighi, N. Y. and Takashi, C.                                                                                                                                                    | Frequency and causes of visual impairment in the xingu indigenous park: Preliminary findings from projeto olhos do xingu                                                    | 2018 | Full text not available             |

|    |                                                                                                                                                                                                                                                                                                                                                                                                                                                                                                                                                                                                                                                                                                                                                                                                                               |                                                                                                                                                                                                                                      |      |                         |
|----|-------------------------------------------------------------------------------------------------------------------------------------------------------------------------------------------------------------------------------------------------------------------------------------------------------------------------------------------------------------------------------------------------------------------------------------------------------------------------------------------------------------------------------------------------------------------------------------------------------------------------------------------------------------------------------------------------------------------------------------------------------------------------------------------------------------------------------|--------------------------------------------------------------------------------------------------------------------------------------------------------------------------------------------------------------------------------------|------|-------------------------|
| 73 | Zeb, A. and Hamid, A. and Uppal, F. and Awan, A.                                                                                                                                                                                                                                                                                                                                                                                                                                                                                                                                                                                                                                                                                                                                                                              | Frequency of refractive error in children of district Abbottabad                                                                                                                                                                     | 2011 | Full text not available |
| 74 | Ferreira, A. S. and Barbosa, E. M. S. and Raposo, N. R. B. and Gattaz, W. F.                                                                                                                                                                                                                                                                                                                                                                                                                                                                                                                                                                                                                                                                                                                                                  | Functional impairment prevalence in Brazilian frailty elderly                                                                                                                                                                        | 2011 | Full text not available |
| 75 | Vázquez Sánchez, M. Covadonga; Gigirey Prieto, Luz M.; Del-Oro-Saez, Carlos P.; Pifieiro-Ces, Antonio; Gandoy Crego, Manuel;                                                                                                                                                                                                                                                                                                                                                                                                                                                                                                                                                                                                                                                                                                  | Functional Vision Screening of Older Adults in Nursing Homes: A Study from Galicia (Northwest Spain)                                                                                                                                 | 2018 | No new AP indicator     |
| 76 | Patel, I.; West, S.;                                                                                                                                                                                                                                                                                                                                                                                                                                                                                                                                                                                                                                                                                                                                                                                                          | Gender differences in presbyopia                                                                                                                                                                                                     | 2009 | No new AP indicator     |
| 77 | Kirtland, K. A. and Saaddine, J. B. and Geiss, L. S. and Thompson, T. J. and Cotch, M. F. and Lee, P. P.                                                                                                                                                                                                                                                                                                                                                                                                                                                                                                                                                                                                                                                                                                                      | Geographic disparity of severe vision loss - United States, 2009-2013                                                                                                                                                                | 2015 | No new AP indicator     |
| 78 | Papas, E. B.; Tahhan, N.; Fricke, T. R.; Wilson, D. A.; Jong, M.; Naidoo, K. S.; Resnikoff, S.; Holden, B. A.;                                                                                                                                                                                                                                                                                                                                                                                                                                                                                                                                                                                                                                                                                                                | Global cost-effectiveness of correcting near vision impairment due to uncorrected presbyopia                                                                                                                                         | 2015 | Full text not available |
| 79 | Holden, B. A. and Fricke, T. R. and Ho, S. M. and Wong, R. and Schlenker, G. and Cronje, S. and Burnett, A. and Papas, E. and Naidoo, K. S. and Frick, K. D.                                                                                                                                                                                                                                                                                                                                                                                                                                                                                                                                                                                                                                                                  | Global vision impairment due to uncorrected presbyopia                                                                                                                                                                               | 2008 | No new AP indicator     |
| 80 | Vos, Theo and Barber, Ryan M. and Bell, Brad and Bertozzi-Villa, Amelia and Biryukov, Stan and Bolliger, Ian and Charlson, Fiona and Davis, Adrian and Degenhardt, Louisa and Dicker, Daniel and Duan, Leilei and Erskine, Holly and Feigin, Valery L. and Ferrari, Alize J. and Fitzmaurice, Christina and Fleming, Thomas and Graetz, Nicholas and Guinovart, Caterina and Haagsma, Juanita and Hansen, Gillian M. and Hanson, Sarah Wulf and Heuton, Kyle R. and Higashi, Hideki and Kassebaum, Nicholas and Kyu, Hmwe and Laurie, Evan and Liang, Xiofeng and Lofgren, Katherine and Lozano, Rafael, et al.                                                                                                                                                                                                               | Global, regional, and national incidence, prevalence, and years lived with disability for 301 acute and chronic diseases and injuries in 188 countries, 1990-2013: a systematic analysis for the Global Burden of Disease Study 2013 | 2015 | No new AP indicator     |
| 81 | Vos, Theo; Allen, Christine; Arora, Megha; Barber, Ryan M.; Bhutta, Zulfiqar A.; Brown, Alexandria; Carter, Austin; Casey, Daniel C.; Charlson, Fiona J.; Chen, Alan Z.; Coggeshall, Megan; Cornaby, Leslie; Dandona, Lalit; Dicker, Daniel J.; Dilege, Tina; Erskine, Holly E.; Ferrari, Alize J.; Fitzmaurice, Christina; Fleming, Tom; Forouzanfar, Mohammad H.; Fullman, Nancy; Gething, Peter W.; Goldberg, Ellen M.; Graetz, Nicholas; Haagsma, Juanita A.; Hay, Simon I.; Johnson, Catherine O.; Kassebaum, Nicholas J.; Kawashima, Toana; Kemmer, Laura; Khalil, Ibrahim A.; Kinfu, Yohannes; Kyu, Hmwe H.; Leung, Janni; Liang, Xiaofeng; Lim, Stephen S.; Lopez, Alan D.; Lozano, Rafael; Marczak, Laurie; Mensah, George A.; Mokdad, Ali H.; Naghavi, Mohsen; Nguyen, Grant; Nsoesie, Elaine; Olsen, Helen; et al. | Global, regional, and national incidence, prevalence, and years lived with disability for 310 diseases and injuries, 1990-2015: a systematic analysis for the Global Burden of Disease Study 2015                                    | 2015 | No new AP indicator     |
| 82 | Vos, Theo and Abajobir, Amanuel Alemu and Abate, Kalkidan Hassen and Abbafati, Cristiana and Abbas, Kaja M. and Abd-Allah, Foad and Abdulkader, Rizwan Suliankatchi and Abdulle, Abdishakur M. and Abebo, Teshome Abuka and Abera, Semaw Ferede and Aboyans, Victor and Abu-Raddad, Laith J. and Ackerman, Ilana N. and Adamu, Abdu Abdullahi and Adetokunboh, Olatunji and Afarideh, Mohsen and Afshin, Ashkan and Agarwal, Sanjay Kumar and Aggarwal, Rakesh and Agrawal, Anurag and Agrawal, Sutapa and Ahmadi, Hamid and Ahmed, Muktar Beshir and Aichour, Miloud Taki Eddine and Aichour, Amani Nidhal and Aichour, Ibtihel and Aiyar, Sneha and Akinyemi, Rufus Olusola and Akseer, Nadia and Al Lami, Faris Hasan and Alahdab, Fares and Al-Aly, Ziyad and Alam, Khurshid and Alam, Noore                              | Global, regional, and national incidence, prevalence, and years lived with disability for 328 diseases and injuries for 195 countries, 1990-2016: a systematic analysis for the Global Burden of Disease Study 2016                  | 2017 | No new AP indicator     |



|     |                                                                                                                                                                                                                                                 |                                                                                                                                                         |      |                                     |
|-----|-------------------------------------------------------------------------------------------------------------------------------------------------------------------------------------------------------------------------------------------------|---------------------------------------------------------------------------------------------------------------------------------------------------------|------|-------------------------------------|
|     | and Alam, Tahiya and Alasfoor, Deena and Alene, Kefyalew Addis and Ali, Raghieb and Alizadeh-Navaei, Reza and Alkerwi, Ala'a, et al.                                                                                                            |                                                                                                                                                         |      |                                     |
| 83  | Sujatha, S; Bapat, G.M; Dash, S.S.                                                                                                                                                                                                              | GRID: a model for the development of assistive devices in developing countries                                                                          | 2019 | Not population-based/representative |
| 84  | Palacios-Ceña, Domingo and Jiménez-García, Rodrigo and Hernández-Barrera, Valentín and Alonso-Blanco, Cristina and Carrasco-Garrido, Pilar and Fernández-delas-Peñas, César                                                                     | Has the Prevalence of Disability Increased Over the Past Decade (2000–2007) in Elderly People? A Spanish Population-based Survey                        | 2012 | No new AP indicator                 |
| 85  | Smith, J. L.; Mitchell, P.; Wang, J. J.; Leeder, S. R.;                                                                                                                                                                                         | health policy for hearing impairment in older Australians: What should it include?                                                                      | 2005 | Not population-based/representative |
| 86  | Baek, Min Kwan and Kim, Young Saing and Kim, Eun Young and Kim, Ae Jin and Choi, Won-Jun                                                                                                                                                        | Health-Related Quality of Life in Korean Adults with Hearing Impairment: The Korea National Health and Nutrition Examination Survey 2010 to 2012        | 2016 | No new AP indicator                 |
| 87  | Rosenhall, U. and Espmark, A. K.                                                                                                                                                                                                                | Hearing aid rehabilitation: what do older people want, and what does the audiogram tell?                                                                | 2003 | Data collected before 2000          |
| 88  | Cohen-Mansfield, J. and Taylor, J. W.                                                                                                                                                                                                           | Hearing aid use in nursing homes, Part 1: Prevalence rates of hearing impairment and hearing aid use                                                    | 2004 | Not population-based/representative |
| 89  | Flynn, M. C. and Kennedy, E. J. and Johns, J. and Stanbridge, R.                                                                                                                                                                                | Hearing and vision loss within residential care facilities -- the need for improved service delivery                                                    | 2002 | No new AP indicator                 |
| 90  | McPherson, B.                                                                                                                                                                                                                                   | Hearing assistive technologies in developing countries: background, achievements and challenges                                                         | 2014 | No new AP indicator                 |
| 91  | Maki-Torkko, E. M. and Brorsson, B. and Davis, A. and Mair, I. W. S. and Myhre, K. I. and Parving, A. and Roine, R. P. and Rosenhall, U. and Sorri, M. J. and Stilven, S.                                                                       | Hearing impairment among adults - Extent of the problem and scientific evidence on the outcome of hearing aid rehabilitation                            | 2001 | Not population-based/representative |
| 92  | Christensen, V. T. and Datta Gupta, N.                                                                                                                                                                                                          | Hearing loss and disability exit: Measurement issues and coping strategies                                                                              | 2017 | No new AP indicator                 |
| 93  | Schneider, J. and Gopinath, B. and Karpa, M. J. and McMahon, C. M. and Rochtchina, E. and Leeder, S. R. and Mitchell, P.                                                                                                                        | Hearing loss impacts on the use of community and informal supports                                                                                      | 2010 | No new AP indicator                 |
| 94  | Marmamula, S. and Barrenkala, N. R. and Challa, R. and Reddy, K. T. and Yellapragada, S. and Brahmanandam, M. S. and Friedman, D. S. and Khanna, R. C.                                                                                          | Hyderabad Ocular Morbidity in Elderly Study (HOMES)-Rationale, Study Design and Methodology                                                             | 2020 | No new AP indicator                 |
| 95  | Layland, B. and Holden, B. and Evans, K. and Bailey, S.                                                                                                                                                                                         | ICEE/AHMRC NSW Aboriginal Eye and Visioncare Program, Australia                                                                                         | 2004 | Not population-based/representative |
| 96  | Bapat, G.M; Sujatha, S.                                                                                                                                                                                                                         | Identification and analysis of knee–ankle–foot orthosis design requirements based on a feedback survey of orthosis users in India                       | 2017 | No new AP indicator                 |
| 97  | Patel, I. and Munoz, B. and Burke, A. G. and Kayongoya, A. and McHiwa, W. and Schwarzwaldler, A. W. and West, S. K.                                                                                                                             | Impact of Presbyopia on Quality of Life in a Rural African Setting                                                                                      | 2006 | No new AP indicator                 |
| 98  | Pryor, W; Smith, F                                                                                                                                                                                                                              | Impacts of the Nippon Foundation's Investments in Prosthetics & Orthotics                                                                               | 2019 | Not population-based/representative |
| 99  | Jaul, E.                                                                                                                                                                                                                                        | importance of increasing awareness of hearing and vision in the elderly population                                                                      | 2006 | Full text not available             |
| 100 | Janna Lam, Kirstin Robertson, Wesley Robertson, Rebecca Bernstein                                                                                                                                                                               | Improving Access to Vision Care for People Who are Homeless through Eyeglasses Recycling                                                                | 2015 | Not population-based/representative |
| 101 | Portuondo-Sao, Miriam and Cobas-Ruiz, Marcia and Zacca-Peña, Eduardo and Lantigua-Cruz, Araceli and López-García, Josefina and Bolívar-Jomarrán, Yosnel and Leyva-Serrano, Martiza and Herrera-Armenteros, Anorys and Morales-Suárez, Ileana R. | Improving Disability Care in Countries of the Bolivarian Alliance for the Peoples of Our America                                                        | 2016 | No new AP indicator                 |
| 102 | Binagwaho, A. and Scott, K. and Rosewall, T. and Mackenzie, G. and Rehnborg, G. and Hannema, S. and Presente, M. and Noe, P. and Mathenge, W. and Nkurikiye, J. and Habiyemwe, F. and Dushime, T.                                               | Improving eye care in Rwanda                                                                                                                            | 2015 | No new AP indicator                 |
| 103 | Zhaisakova, D. and Kudaibergenova, S. and Mukanova, Z. and Djarkinbekova, G. and Kaltayeva, M. and Kuzembayev, Y.                                                                                                                               | incidence and prevalence of hearing disorders in children according to the audiological screening                                                       | 2017 | Full text not available             |
| 104 | Mahmudi, E. and Mema, V. and Burda, N. and Selimi, B. and Zhugli, S.                                                                                                                                                                            | Incidence of the refractive errors in children 3 to 9 years of age, in the city of Tetovo, Macedonia                                                    | 2013 | No new AP indicator                 |
| 105 | Keunen, J. E. E. and Verezen, C. A. and Imhof, S. M. and Rens, G. H. M. B. van and Asselbergs, M. B. and Limburg, J. J.                                                                                                                         | Increase in the demand for eye-care services in the Netherlands 2010-2020                                                                               | 2011 | Full text not available             |
| 106 | Mohanty, S. and Jolley, E. and Mohanty, R. N. and Buttan, S. and Schmidt, E.                                                                                                                                                                    | Integrating geospatial data and measures of disability and wealth to assess inequalities in an eye health survey: An example from the Indian sunderbans | 2019 | No new AP indicator                 |

|     |                                                                                                                                                                                                                                                                                                                                                                                                                                                                                                                                                                                                                                                                   |                                                                                                                                                                  |      |                                     |
|-----|-------------------------------------------------------------------------------------------------------------------------------------------------------------------------------------------------------------------------------------------------------------------------------------------------------------------------------------------------------------------------------------------------------------------------------------------------------------------------------------------------------------------------------------------------------------------------------------------------------------------------------------------------------------------|------------------------------------------------------------------------------------------------------------------------------------------------------------------|------|-------------------------------------|
| 107 | Visagie, S. J. and Matter, R. and Kayange, G. M. and Chiwaula, M. and Harniss, M. and Mji, G. and Scheffler, E.                                                                                                                                                                                                                                                                                                                                                                                                                                                                                                                                                   | Lessons from the pilot of a mobile application to map assistive technology suppliers in Africa                                                                   | 2018 | No new AP indicator                 |
| 108 | Nwosu, S. N.                                                                                                                                                                                                                                                                                                                                                                                                                                                                                                                                                                                                                                                      | Low vision in persons aged 50 and above in the onchocercal endemic communities of Anambra State, Nigeria                                                         | 2000 | Full text not available             |
| 109 | Bourne, Rupert R. A. and Flaxman, Seth R. and Braithwaite, Tasanee and Cicinelli, Maria V. and Das, Aditi and Jonas, Jost B. and Keeffe, Jill and Kempen, John H. and Leasher, Janet and Limburg, Hans and Naidoo, Kavin and Pesudovs, Konrad and Resnikoff, Serge and Silvester, Alex and Stevens, Gretchen A. and Tahhan, Nina and Wong, Tien Y. and Taylor, Hugh R. and Bourne, Rupert and Ackland, Peter and Ardit, Aries and Barkana, Yaniv and Bozkurt, Banu and Braithwaite, Tasanee and Bron, Alain and Budenz, Donald and Cai, Feng and Casson, Robert and Chakravarthy, Usha and Choi, Jaewan and Cicinelli, Maria Vittoria and Congdon, Nathan, et al. | Magnitude, temporal trends, and projections of the global prevalence of blindness and distance and near vision impairment: a systematic review and meta-analysis | 2017 | No new AP indicator                 |
| 110 | PEEK                                                                                                                                                                                                                                                                                                                                                                                                                                                                                                                                                                                                                                                              | Making Eye Health Visible: Community eye health in Pakistan                                                                                                      | 2020 | No new AP indicator                 |
| 111 | Comman, J. C. and Freedman, V. A. and Agree, E. M.                                                                                                                                                                                                                                                                                                                                                                                                                                                                                                                                                                                                                | Measurement of assistive device use: Implications for estimates of device use and disability in late life                                                        | 2005 | No new AP indicator                 |
| 112 | Smith, E. M; Battistella, L. R; et al.                                                                                                                                                                                                                                                                                                                                                                                                                                                                                                                                                                                                                            | Measuring met and unmet assistive technology needs at the national level: Comparing national database collection tools across eight case countries               | 2019 | No new AP indicator                 |
| 113 | Mhatre, A; Rosen, P; et al.                                                                                                                                                                                                                                                                                                                                                                                                                                                                                                                                                                                                                                       | A model to standardize the procurement and quality of assistive technologies in less-resourced settings                                                          | 2019 | No new AP indicator                 |
| 114 | de Witte, L; Carter, L; et al.                                                                                                                                                                                                                                                                                                                                                                                                                                                                                                                                                                                                                                    | Models of assistive technology service delivery in low resource settings: A literature review of different approaches and their quality and impact               | 2019 | No new AP indicator                 |
| 115 | Castagno, V. D. and Fassa, A. G. and Vilela, M. A. P. and Meucci, R. D. and Resende, D. P. M.                                                                                                                                                                                                                                                                                                                                                                                                                                                                                                                                                                     | Moderate hyperopia prevalence and associated factors among elementary school students                                                                            | 2015 | No new AP indicator                 |
| 116 | Kaaren Mathias 1 , Hira Pant 2 , Manjula Marella 3 , Lawrence Singh 4 , Gvs Murthy 2 , Nathan Grills 3                                                                                                                                                                                                                                                                                                                                                                                                                                                                                                                                                            | Multiple barriers to participation for people with psychosocial disability in Dehradun district, North India: a cross-sectional study.                           | 2018 | No new AP indicator                 |
| 117 | Matheson, J. I. D. M. and Atijosan, O. and Kuper, H. and Rischewski, D. and Simms, V. and Lavy, C.                                                                                                                                                                                                                                                                                                                                                                                                                                                                                                                                                                | Musculoskeletal impairment of traumatic etiology in Rwanda: prevalence, causes, and service implications                                                         | 2011 | No new AP indicator                 |
| 118 | Adhikari, S.                                                                                                                                                                                                                                                                                                                                                                                                                                                                                                                                                                                                                                                      | Myopia in school children from high mountain region of Nepal                                                                                                     | 2013 | Not population-based/representative |
| 119 | Cheng, C. Y. and Huang, W. and Su, K. C. and Peng, M. L. and Sun, H. Y. and Cheng, H. M.                                                                                                                                                                                                                                                                                                                                                                                                                                                                                                                                                                          | Myopization factors affecting urban elementary school students in Taiwan                                                                                         | 2013 | No new AP indicator                 |
| 120 | Mathenge, Wanjiku and Bastawrous, Andrew and Foster, Allen and Kuper, Hannah                                                                                                                                                                                                                                                                                                                                                                                                                                                                                                                                                                                      | Nakuru Posterior Segment Eye Disease Study: Methods and Prevalence of Blindness and Visual Impairment in Nakuru, Kenya                                           | 2012 | No new AP indicator                 |
| 121 | Menon, G. R. and Singh, L. and Sharma, P. and Yadav, P. and Sharma, S. and Kalaskar, S. and Singh, H. and Adinarayanan, S. and Joshua, V. and Kulothungan, V. and Yadav, J. and Watson, L. K. and Fadel, S. A. and Suraweera, W. and Rao, M. V. V. and Dhaliwal, R. S. and Begum, R. and Sati, P. and Jamison, D. T. and Jha, P.                                                                                                                                                                                                                                                                                                                                  | National Burden Estimates of healthy life lost in India, 2017: an analysis using direct mortality data and indirect disability data                              | 2019 | No new AP indicator                 |
| 122 | Anjou, M. D. and Boudville, A. I. and Taylor, H. R.                                                                                                                                                                                                                                                                                                                                                                                                                                                                                                                                                                                                               | Nationally consistent spectacle supply for Indigenous Australians                                                                                                | 2013 | No new AP indicator                 |
| 123 | Fuller, Spencer D. and Mudie, Lucy I. and Siordia, Carlos and Swenor, Bonnielin K. and Friedman, David S.                                                                                                                                                                                                                                                                                                                                                                                                                                                                                                                                                         | Nationwide Prevalence of Self-Reported Serious Sensory Impairments and Their Associations with Self-Reported Cognitive and Functional Difficulties               | 2018 | No new AP indicator                 |
| 124 | Wubben, T. and Wolfe, G. and Guerrero, C. and Korcz, W. J. and Ramsey, D. J.                                                                                                                                                                                                                                                                                                                                                                                                                                                                                                                                                                                      | Near visual acuity in an inner city Hispanic community: understanding the barriers and benefits of correction                                                    | 2014 | Not population-based/representative |
| 125 | Eide, A. H; Mji, G; Chiwaula, M.                                                                                                                                                                                                                                                                                                                                                                                                                                                                                                                                                                                                                                  | Need for, access to and quality of assistive technology in low- and middle-income countries                                                                      | 2019 | No new AP indicator                 |
| 126 | Mranga, H.                                                                                                                                                                                                                                                                                                                                                                                                                                                                                                                                                                                                                                                        | need of category I prosthetist and orthotist in Africa                                                                                                           | 2015 | Full text not available             |
| 127 | Antoni, M. and Rouillon, I. and Denoyelle, F. and Garabedian, E. N. and Loundon, N.                                                                                                                                                                                                                                                                                                                                                                                                                                                                                                                                                                               | Newborn hearing screening: Prevalence and medical and paramedical treatment of bilateral hearing loss in a neonatal series in the Ile-de-France region of France | 2016 | No new AP indicator                 |
| 128 | Lupsakko, T. A. and Kautiainen, H. J. and Sulkava, R.                                                                                                                                                                                                                                                                                                                                                                                                                                                                                                                                                                                                             | non-use of hearing aids in people aged 75 years and over in the city of Kuopio in Finland                                                                        | 2005 | Data collected before 2000          |



|     |                                                                                                                                                                                                                             |                                                                                                                                                  |      |                                     |
|-----|-----------------------------------------------------------------------------------------------------------------------------------------------------------------------------------------------------------------------------|--------------------------------------------------------------------------------------------------------------------------------------------------|------|-------------------------------------|
| 129 | Ferreira, B. G. and Toenjes, R. H. F. and De Sousa, P. I. G. and De Paula Souza, V. L. and Torres, G. T. and Vieira, M. I. S. and Jammal, A. A. and Rim, P. H. H. and Alves, M.                                             | Ophthalmological Care and Eyeglasses Distribution in Brazil's Countryside: Descriptive and Epidemiological Data of Nearly Five Thousand Patients | 2019 | Full text not available             |
| 130 | Amirozi, Ahmad and Irfan, Mohamad and Suzana, Mansor and Mohd Khairi, Daud and Dinsuhaimi, Sidek                                                                                                                            | Outcome of a newborn hearing screening program in a tertiary hospital in Malaysia: the first five years                                          | 2011 | Not population-based/representative |
| 131 | Ndife, T.I; Abdullahi, S.M; Olaniyi, S.                                                                                                                                                                                     | Outcome of vision screening of eye health workers at a tertiary eye hospital in north-western Nigeria                                            | 2017 | Full text not available             |
| 132 | Bourne, R. R. A. and Dineen, B. P. and Ali, S. M. and Huq, D. M. N. and Johnson, G. J.                                                                                                                                      | Outcomes of cataract surgery in Bangladesh: results from a population based nationwide survey                                                    | 2003 | No new AP indicator                 |
| 133 | Baloyi, V. H. A.; Akinsola, H. A.; Mabunda, J. T.;                                                                                                                                                                          | Pattern of distribution of refractive error among primary school children in Malamulele community of Limpopo province, South Africa              | 2018 | Full text not available             |
| 134 | Shaikh, S. P. and Aziz, T. M.                                                                                                                                                                                               | Pattern of eye diseases in children of 5-15 years at Bazzertaline area (South Karachi) Pakistan                                                  | 2005 | Full text not available             |
| 135 | Robaei, D. and Rose, K. and Kifley, A. and Mitchell, P.                                                                                                                                                                     | Patterns of spectacle use in young Australian school children: Findings from a population-based study                                            | 2005 | No new AP indicator                 |
| 136 | Ning-Chia Chang 1 2 3, Chia-Yen Dai 4 5, Wen-Yi Lin 3, Chen-Yu Chien 1 2, Meng-Hsuen Hsieh 4 5, Kuen-Yao Ho 1 6                                                                                                             | Perception of hearing impairment and the willingness to use hearing aids in an elderly population in southern Taiwan: A community-based study    | 2016 | Not population-based/representative |
| 137 | Kayange, Gerge;                                                                                                                                                                                                             | Perspectives on a mobile application that maps assistive technology resources in Africa                                                          | 2019 | No new AP indicator                 |
| 138 | Benedict, R. E.; Baumgardner, A. M.;                                                                                                                                                                                        | population approach to understanding children's access to assistive technology                                                                   | 2009 | Not population-based/representative |
| 139 | Ramesh, Sathyamangalam Ve; George, Ronnie; Soni, Premal M.; Palaniappan, Lakshmanan; Raju, Prema; Paul, Pradeep G.; Ramsathish, Sivarathinasami; Vijaya, Lingam;                                                            | Population norms for frequency doubling perimetry with uncorrected refractive error                                                              | 2007 | No new AP indicator                 |
| 140 | Congdon, N. G.; Yi, H.; Zhang, H.; Ma, X.; Zhang, L.; Wang, X.; Naidoo, K. S.; Minto, H.; Zou, H.; Rozelle, S.;                                                                                                             | Population prevalence of vision impairment and spectacle wear among urban migrant children in China                                              | 2015 | Full text not available             |
| 141 | Davis, A.;                                                                                                                                                                                                                  | Population study of the ability to benefit from amplification and the provision of a hearing aid in 55-74-year-old first-time hearing aid users  | 2003 | Data collected before 2000          |
| 142 | Nirmalan, P. K.; Sannapaneni, Krishnaiah; Shamanna, B. R.; Rao, G. N.; Ravi, Thomas;                                                                                                                                        | population-based assessment of presbyopia in the state of Andhra Pradesh, South India: the Andhra Pradesh eye disease study                      | 2006 | Data collected before 2000          |
| 143 | Marmamula, S. and Khanna, R. C.                                                                                                                                                                                             | Population-based assessment of prevalence and causes of visual impairment in the state of Tripura, India                                         | 2017 | Full text not available             |
| 144 | Dandona, R. and Dandona, L. and Kovai, V. and Giridhar, P. and Prasad, M. N. and Srinivas, M.                                                                                                                               | Population-based study of spectacles use in southern India                                                                                       | 2002 | Data collected before 2000          |
| 145 | Gilbert, Clare E. and Shah, S. P. and Jadoon, M. Z. and Bourne, R. and Dineen, B. and Khan, M. A. and Johnson, G. J. and Khan, M. D. and Pakistan National Eye Survey Study, Group                                          | Poverty and blindness in Pakistan: results from the Pakistan national blindness and visual impairment survey                                     | 2008 | No new AP indicator                 |
| 146 | Cunha, C. C.; Munoz, S.; Furtado, J. M.; Cavascan, N. N.; Berezovsky, A.; Campos, M.; Cohen, M. J.; Cohen, J. M.; Rubens, B.; Salomao, S. R.;                                                                               | Presbyopia and near vision impairment in older adults from parintins: The Brazilian amazon region eye survey (bares)                             | 2016 | Full text not available             |
| 147 | Patel, I.; West, S. K.;                                                                                                                                                                                                     | Presbyopia: prevalence, impact, and interventions                                                                                                | 2007 | No new AP indicator                 |
| 148 | Maralcan, G.; Kuru, I.; Aydin, U. Y.; Altinel, L.; Bozan, M. E.; Ellidokuz, H.;                                                                                                                                             | prevalance of orthopedic disabilities in the district of Cay, Afyon, Turkey                                                                      | 2004 | No new AP indicator                 |
| 149 | Rajiv Khandekar 1, Ali Jaffer Mohammed, Abdulatif Al Raisi                                                                                                                                                                  | Prevalence and causes of blindness & low vision; before and five years after 'VISION 2020' initiatives in Oman: A review                         | 2007 | No new AP indicator                 |
| 150 | Ahmad, K.; Khan, M. D.; Qureshi, M. B.; Munami, S.; Shah, R. A.; Rasheed, H.; Jamali, B.; Baluch, A.; Khan, M. A.;                                                                                                          | Prevalence and causes of blindness and low vision in a rural setting in Pakistan                                                                 | 2005 | Data collected before 2000          |
| 151 | Nakul Singh, 1 Shiva Shankar Eeda, 2, 3 Bala Krishna Gudapati, 2, 3 Srinivasa Reddy, 2, 3 Pushkar Kanade, 4 Ghanshyam Palamaner Subash Shantha, 5, 6 Padmaja Kumari Rani, 7, 8 Subhabrata Chakrabarti, 7 and Rohit C Khanna | Prevalence and causes of blindness and visual impairment and their associated risk factors, in three tribal areas of Andhra Pradesh, India       | 2014 | No new AP indicator                 |
| 152 | Taryam, M. O.; Rabi, M. M.; Muhammad, N.; Oladigbolu, K.; Abdurrahman, H.;                                                                                                                                                  | Prevalence and causes of blindness and visual impairment; And cataract surgical services in Katsina state of Nigeria                             | 2019 | No new AP indicator                 |
| 153 | Adeoti, C. O.                                                                                                                                                                                                               | Prevalence and causes of blindness in a tropical African population                                                                              | 2004 | Data collected before 2000          |

|     |                                                                                                                                                                                        |                                                                                                                                                                                                                                                                                                   |      |                                     |
|-----|----------------------------------------------------------------------------------------------------------------------------------------------------------------------------------------|---------------------------------------------------------------------------------------------------------------------------------------------------------------------------------------------------------------------------------------------------------------------------------------------------|------|-------------------------------------|
| 154 | Furtado, J. M. and Cavascan, N. N. and Munoz, S. and Berezovsky, A. and Cohen, M. J. and Vasconcelos, G. C. and Cohen, J. M. and Watanabe, S. E. S. and Belfort, R. and Salomao, S. R. | Prevalence and causes of distance vision impairment and blindness in older adults in urban and rural areas of parintins: The Brazilian amazon region eye survey                                                                                                                                   | 2016 | Full text not available             |
| 155 | Ajaiyeoba, A. I. and Isawumi, M. A. and Adeoye, A. O. and Oluleye, T. S.                                                                                                               | Prevalence and causes of eye diseases amongst students in south-western Nigeria                                                                                                                                                                                                                   | 2006 | No new AP indicator                 |
| 156 | Thapa, R.; Bajimaya, S.; Paudyal, G.; Khanal, S.; Tan, S.; Thapa, S. S.; van Rens, G. H. M. B.;                                                                                        | Prevalence and causes of low vision and blindness in an elderly population in Nepal: the Bhaktapur retina study                                                                                                                                                                                   | 2018 | No new AP indicator                 |
| 157 | Buch, Helena and Vinding, Troels and Nielsen, Niels Vesti                                                                                                                              | Prevalence and causes of visual impairment according to World Health Organization and United States criteria in an aged, urban Scandinavian population: The Copenhagen City Eye Study1 1The authors have no financial or commercial interests in the subject matter or materials mentioned herein | 2001 | Data collected before 2000          |
| 158 | Dhanesha, U. and Polack, S. and Bastawrous, A. and Banks, L. M.                                                                                                                        | Prevalence and causes of visual impairment among schoolchildren in Mekelle, Ethiopia                                                                                                                                                                                                              | 2018 | Not population-based/representative |
| 159 | Buch, Helena and Vinding, Troels and la Cour, Morten and Appleyard, Merete and Jensen, Gorm B. and Vesti Nielsen, Niels                                                                | Prevalence and causes of visual impairment and blindness among 9980 Scandinavian adults: The Copenhagen City Eye Study                                                                                                                                                                            | 2004 | Data collected before 2000          |
| 160 | Tang, Y. and Wang, X. and Wang, J. and Huang, W. and Gao, Y. and Luo, Y. and Lu, Y.                                                                                                    | Prevalence and Causes of Visual Impairment in a Chinese Adult Population: The Taizhou Eye Study                                                                                                                                                                                                   | 2015 | No new AP indicator                 |
| 161 | Hsu, Wen-Ming and Cheng, Ching-Yu and Liu, Jorn-Hon and Tsai, Su-Ying and Chou, Pesus                                                                                                  | Prevalence and causes of visual impairment in an elderly Chinese population in Taiwan11The authors have no proprietary interest in any aspect of the study.: The Shihpai Eye Study                                                                                                                | 2004 | Data collected before 2000          |
| 162 | Tarczy-Hornoch, Kristina and Cotter, Susan A. and Borchert, Mark and McKean-Cowdin, Roberta and Lin, Jesse and Wen, Ge and Kim, Jennifer and Varma, Rohit                              | Prevalence and Causes of Visual Impairment in Asian and Non-Hispanic White Preschool Children: Multi-Ethnic Pediatric Eye Disease Study                                                                                                                                                           | 2013 | No new AP indicator                 |
| 163 | Edussuriya, Kapila and Sennanayake, Saman and Senaratne, Tissa and Marshall, Drew and Sullivan, Thomas and Selva, Dinesh and Casson, Robert J.                                         | Prevalence and Causes of Visual Impairment in Central Sri Lanka: The Kandy Eye Study                                                                                                                                                                                                              | 2009 | No new AP indicator                 |
| 164 | Hyman, Leslie and Wu, Suh-Yuh and Connell, Anthea M. S. and Schachat, Andrew and Nemesure, Barbara and Hennis, Anselm and Leske, M. Cristina                                           | Prevalence and causes of visual impairment in the Barbados eye study                                                                                                                                                                                                                              | 2001 | Data collected before 2000          |
| 165 | Theis, Kristina, and Roblin, Douglas, and Helmick, Charles, and Luo, Ruiyan                                                                                                            | Prevalence and causes of work disability among working-age U.S. adults, 2011–2013, NHIS                                                                                                                                                                                                           | 2013 | No new AP indicator                 |
| 166 | Inam, S. and Asghar, F. and Naeem, T. and Unum, A. and Ahsan, U. and Latif, A.                                                                                                         | Prevalence and comparison of undetected refractive errors among children of age b/w 5-10 years in public & private sector schools                                                                                                                                                                 | 2018 | No new AP indicator                 |
| 167 | Manjula Marella 1 , Nafisa L Huq 2 , Alexandra Devine 3 , Sally M Baker 4 , Md A Quaiyum 5 , Jill E Keeffe 6                                                                           | Prevalence and correlates of disability in Bogra district of Bangladesh using the rapid assessment of disability survey.                                                                                                                                                                          | 2015 | No new AP indicator                 |
| 168 | Lasisi, A. O. and Abiona, T. and Gureje, O.                                                                                                                                            | prevalence and correlates of self-reported hearing impairment in the Ibadan Study of Ageing                                                                                                                                                                                                       | 2010 | No new AP indicator                 |
| 169 | Erin D Bouldin 1 , Andrew Vandenberg 2 , Manan Roy 2 , Adam Hege 3 , Jennifer J Zwetsloot 3 , Jennifer S Howard 3                                                                      | Prevalence and domains of disability within and outside Appalachian North Carolina: 2013–2016 Behavioral Risk Factor Surveillance System                                                                                                                                                          | 2019 | No new AP indicator                 |
| 170 | Ling-Lin, L. and Zheng-Zheng, W. and Dong-Feng, L. and Yin, Y.                                                                                                                         | Prevalence and influencing factors of myopia between adolescents in Chengdu and Mianyang Area                                                                                                                                                                                                     | 2019 | Full text not available             |
| 171 | Wang, W. L. and Chen, N. and Sheu, M. M. and Wang, J. H. and Hsu, W. L. and Hu, Y. J.                                                                                                  | prevalence and risk factors of visual impairment among the elderly in Eastern Taiwan                                                                                                                                                                                                              | 2016 | Not population-based/representative |
| 172 | Varma, Rohit and Ying-Lai, Mei and Klein, Ronald and Azen, Stanley P.                                                                                                                  | Prevalence and risk indicators of visual impairment and blindness in Latinos: the Los Angeles Latino Eye Study                                                                                                                                                                                    | 2004 | No new AP indicator                 |
| 173 | Wittich, W. and Hamalainen, A. and Pichora-Fuller, M. K. and Phillips, N. and Kolisang, L. and Guthrie, D. and Mick, P.                                                                | Prevalence and severity of dual sensory loss (vision & hearing) in the Canadian Longitudinal Study on Aging                                                                                                                                                                                       | 2018 | Full text not available             |
| 174 | Rajavi, Z. and Sabbaghi, H. and Baghini, A. S. and Yaseri, M. and Moein, H. and Akbarian, S. and Behradfar, N. and Hosseini, S. and Rabei, H. M. and Sheibani, K.                      | Prevalence of amblyopia and refractive errors among primary school children                                                                                                                                                                                                                       | 2015 | No new AP indicator                 |
| 175 | Zhu, X. and Zhu, J. and Zou, H. and Lu, L. and Zhao, H. and Li, Q. and He, X.                                                                                                          | Prevalence of ametropia and visual impairment in elementary school students in Baoshan District of Shanghai                                                                                                                                                                                       | 2014 | Full text not available             |
| 176 | Rabiu, M. M. and Al-Bdour, M. D. and Ameerh, M. A. A. and Jadoon, M. Z.                                                                                                                | Prevalence of blindness and diabetic retinopathy in northern Jordan                                                                                                                                                                                                                               | 2015 | No new AP indicator                 |
| 177 | Osuchukwu, N. C.                                                                                                                                                                       | Prevalence of common visual problems among primary school children in Calabar Municipality, Nigeria                                                                                                                                                                                               | 2003 | Data collected before 2000          |
| 178 | Ramachandra, Srikrishna Sulgodu and Allagh, Komal Preet and Kumar, Hemanth                                                                                                             | Prevalence of disability among adults using Rapid Assessment of Disability tool in a rural district of South India                                                                                                                                                                                | 2016 | No new AP indicator                 |

|     |                                                                                                                                                                                                                                |                                                                                                                                                                                          |      |                                     |
|-----|--------------------------------------------------------------------------------------------------------------------------------------------------------------------------------------------------------------------------------|------------------------------------------------------------------------------------------------------------------------------------------------------------------------------------------|------|-------------------------------------|
|     | and Grills, Nathan and Marella, Manjula and Pant, Hira and Mahesh, D. and Soji, Fairlene and Mani, Srinivasan and Murthy, G. V. S.                                                                                             |                                                                                                                                                                                          |      |                                     |
| 179 | Graciani, Auxiliadora and Banegas, Josa R. and Lopez-Garca, Esther and Rodriguez-Artalejo, Fernando                                                                                                                        | Prevalence of disability and associated social and health-related factors among the elderly in Spain: a population-based study                                                           | 2004 | No new AP indicator                 |
| 180 | Zhao, Guixiang and Okoro, Catherine A. and Hsia, Jason and Garvin, William S. and Town, Machell                                                                                                                                | Prevalence of Disability and Disability Types by Urban/Rural County Classification—U.S., 2016                                                                                            | 2019 | No new AP indicator                 |
| 181 | Venkatorao, T. and Ezhil, R. and Jabbar, S. and Ramakrishnan, R.                                                                                                                                                               | Prevalence of disability and handicaps in geriatric population in rural south India                                                                                                      | 2005 | Data collected before 2000          |
| 182 | Velayutham, Banurekha and Kangusamy, Boopathi and Joshua, Vasna and Mehendale, Sanjay                                                                                                                                          | prevalence of disability in elderly in India — Analysis of 2011 census data                                                                                                              | 2016 | No new AP indicator                 |
| 183 | Gupta, K. and Singh, K. and Aggarwal, A. and Gupta, A. and Bansal, P.                                                                                                                                                          | Prevalence of eye abnormalities in school going children in Amritsar - a study conducted by a tertiary eye care centre in an urban school                                                | 2015 | Not population-based/representative |
| 184 | Collins, M. and Mudie, L. I. and Slavin, R. and Corcoran, R. and Owoeye, J. and Chang, D. S. T. and Repka, M. and Friedman, D. S.                                                                                              | Prevalence of eye disease and reading difficulty in an inner city elementary school population—preliminary results from the baltimore reading and eye disease study (BREDS)              | 2016 | Full text not available             |
| 185 | Ervin, R. B.                                                                                                                                                                                                                   | Prevalence of functional limitations among adults 60 years of age and over: United States, 1999-2002                                                                                     | 2006 | No new AP indicator                 |
| 186 | Ostchega, Y. and Harris, T. B. and Hirsch, R. and Parsons, V. L. and Kington, R.                                                                                                                                               | prevalence of functional limitations and disability in older persons in the US: Data from The National Health and Nutrition Examination Survey III                                       | 2000 | Data collected before 2000          |
| 187 | Iselin Ertzgaard, Solvang and Kristin, Naalsund and Sofie, Tander and Giske Sindberg, Hansen and Tobias Bang, Hagan and Cosmas, Mnyanyi and Tron Vedul, Tronstad and Aslam, Nkya and Jon, yrgarden                           | Prevalence of hearing impairment among primary school children in the Kilimanjaro region within Tanzania                                                                                 | 2020 | No new AP indicator                 |
| 188 | Johansson, M. S. K. and Arlinger, S. D.                                                                                                                                                                                        | Prevalence of hearing impairment in a population in Sweden                                                                                                                               | 2003 | Data collected before 2000          |
| 189 | Schmucker, C. and Kapp, P. and Motschall, E. and Loehler, J. and Meerpohl, J. J.                                                                                                                                               | Prevalence of hearing loss and use of hearing aids among children and adolescents in Germany: a systematic review                                                                        | 2019 | No new AP indicator                 |
| 190 | Harvey, E. M. and Dobson, V. and Miller, J. M.                                                                                                                                                                                 | Prevalence of high astigmatism, eyeglass wear, and poor visual acuity among Native American grade school children                                                                        | 2006 | Data collected before 2000          |
| 191 | Villarreal, G. M. and Ohlsson, J. and Cavazos, H. and Abrahamsson, M. and Mohamed, J. H.                                                                                                                                       | Prevalence of myopia among 12- to 13-year-old schoolchildren in Northern Mexico                                                                                                          | 2003 | Data collected before 2000          |
| 192 | Salomao, S. R. and Munoz, S. and Furtado, J. M. and Sacai, P. Y. and Cohen, M. J. and Cohen, J. M. and Higashi Mitsuhiro, M. R. K. and Arruda, S. B. and Belfort, R. and Berezovsky, A.                                        | Prevalence of near vision impairment in middle-aged and older adults in an urban census sector of parintins, brazilian amazon region                                                     | 2014 | Full text not available             |
| 193 | Dey, A. K. and Nath, A. B.                                                                                                                                                                                                     | Prevalence of ocular morbidities among school children in a rural block of Cachar, Assam                                                                                                 | 2017 | Not population-based/representative |
| 194 | Muhammad, R. C. and Jamda, M. A. and Langnap, L.                                                                                                                                                                               | Prevalence of presbyopia in rural Abuja, Nigeria                                                                                                                                         | 2015 | No new AP indicator                 |
| 195 | Ferdausi, N.                                                                                                                                                                                                                   | Prevalence of presbyopia, presbyopia correction coverage and barriers to uptake eye-care services for near-vision impairments among indigenous population in northern part of bangladesh | 2017 | Full text not available             |
| 196 | Ismond, J. M. and Timmermans, M. A. and Ubels, J. L. and Hoogewerf, A. J.                                                                                                                                                      | Prevalence of refractive error and need for corrective lenses in a medically underserved population in Tijuana, Mexico                                                                   | 2017 | Not population-based/representative |
| 197 | Al-Rowaily, M. A.                                                                                                                                                                                                              | Prevalence of refractive errors among pre-school children at King Abdulaziz Medical City, Riyadh, Saudi Arabia                                                                           | 2010 | No new AP indicator                 |
| 198 | Zoia, Atta and Arif, A. S. and Iftikhar, Ahmed and Umer, Farooq                                                                                                                                                                | Prevalence of refractive errors in Madrassa students of Haripur district                                                                                                                 | 2015 | No new AP indicator                 |
| 199 | Mayro, E. L. and Hark, L. A. and Shiuey, E. and Hill-Bennett, T. and Khanna, N. and Silverstein, M. and Tran, J. and Siraj, S. and Pond, M. and Donaghy, J. and Siam, L. and Zhan, T. T. and Murchison, A. P. and Levin, A. V. | Prevalence of refractive errors in school-aged children in the School District of Philadelphia                                                                                           | 2017 | Full text not available             |
| 200 | Popov, I. and Valaskova, J. and Stefanickova, J. and Krasnik, V.                                                                                                                                                               | Prevalence of refractive errors in the Slovak population calculated using the Gullstrand schematic eye model                                                                             | 2017 | Not population-based/representative |
| 201 | Mencher, G. T. and Madriz Alfaro, J. J.                                                                                                                                                                                        | Prevalence of sensorineural hearing loss in children in Costa Rica                                                                                                                       | 2000 | Full text not available             |
| 202 | Rose, K. and Younan, C. and Morgan, I. and Mitchell, P.                                                                                                                                                                        | Prevalence of undetected ocular conditions in a pilot sample of school children                                                                                                          | 2003 | Not population-based/representative |
| 203 | Zhao, Jialiang and Xu, Xiao and Ellwein, Leon B. and Cai, Ning and Guan, Huaijin and He, Mingguang and Liu, Ping and Lv,                                                                                                       | Prevalence of Vision Impairment in Older Adults in Rural China in 2014 and Comparisons With the 2006 China Nine-Province Survey                                                          | 2018 | No new AP indicator                 |

|     |                                                                                                                                                                                                                                                              |                                                                                                                                                                                             |      |                                     |
|-----|--------------------------------------------------------------------------------------------------------------------------------------------------------------------------------------------------------------------------------------------------------------|---------------------------------------------------------------------------------------------------------------------------------------------------------------------------------------------|------|-------------------------------------|
|     | Jianhua and Sheng, Xunlun and Yang, Peizeng and Yi, Jinglin and Yang, Mei and Zhang, Rui and Ding, Xiaohu and Du, Liping and Li, Fengrong and Lu, Hong and Shao, Wenqiang and Wang, Junwei and Yuan, Yuansheng and Zhou, Rui and Zhuang, Wenjuan and An, Lei |                                                                                                                                                                                             |      |                                     |
| 204 | Xu, Liang and Cui, Tongtong and Yang, Hua and Hu, Ailian and Ma, Ke and Zheng, Yuanyuan and Sun, Baochen and Li, Jianjun and Fan, Guizhi and Jonas, Jost B.                                                                                                  | Prevalence of Visual Impairment among Adults in China: The Beijing Eye Study                                                                                                                | 2006 | No new AP indicator                 |
| 205 | Ndegwa, L. K. and Karimurio, J. and Okelo, R. O. and Adala, H. S.                                                                                                                                                                                            | Prevalence of visual impairment and blindness in a Nairobi urban population                                                                                                                 | 2006 | No new AP indicator                 |
| 206 | Chin, M. P. and Siong, K. H. and Chan, K. H. and Do, C. W. and Chan, H. H. and Cheong, A. M.                                                                                                                                                                 | Prevalence of visual impairment and refractive errors among different ethnic groups in schoolchildren in Turpan, China                                                                      | 2015 | Not population-based/representative |
| 207 | Gresset, J. and Baumgarten, M.                                                                                                                                                                                                                               | Prevalence of visual impairment and utilization of rehabilitation services in the visually impaired elderly population of Quebec                                                            | 2002 | Data collected before 2000          |
| 208 | Antonelli, J. W. and Netto, A. A. and Dario, C. da S. and Ferre, L. B. and Pereira, M. C. S. R.                                                                                                                                                              | Prevalence of visual impairment in children from public and private schools in the city of Tubarao (Santa Catarina State)                                                                   | 2012 | Full text not available             |
| 209 | Evans, J. R. and Fletcher, A. E. and Wormald, R. P. L. and Ng, E. Siu-Woon and Stirling, S. and Smeeth, L. and Breeze, E. and Bulpitt, C. J. and Nunes, M. and Jones, D. and Tulloch, A.                                                                     | Prevalence of visual impairment in people aged 75 years and older in Britain: results from the MRC trial of assessment and management of older people in the community                      | 2002 | Data collected before 2000          |
| 210 | Franck, C. and Vorwerk, W. and Kohn, A. and Rismann, A. and Vorwerk, U.                                                                                                                                                                                      | Prevalence, Risk Factors and Diagnostics of Hearing Impairment in Preterm Infants                                                                                                           | 2017 | Full text not available             |
| 211 | Singh, N. and Khanna, R. C. and Reddy, S. and Eeda, S. S. and Gudapati, B. K. and Mettla, A. L. and Chakrabarti, S. and Kanade, P. and Shantha, G. P. S.                                                                                                     | Prevalences, causes and risk factors of blindness and visual impairment in three tribal areas of Andhra Pradesh, India                                                                      | 2014 | No new AP indicator                 |
| 212 | Ajitha, Katta and Krishna, A. K. I. and Bagavandas, M. and Aneqawa, T. and Suresh, Munuswamy                                                                                                                                                                 | Progressive disability in elderly population among tribals of Telangana: a cross sectional study                                                                                            | 2017 | No new AP indicator                 |
| 213 | Barton, G. and Davis, A. and Mair, I. W. S. and Parving, A. and Rosenhall, U. and Sorri, M.                                                                                                                                                                  | Provision of hearing aid services: A comparison between the Nordic countries and the United Kingdom                                                                                         | 2001 | Data collected before 2000          |
| 214 | Harkins, C. S. and McGarry, A. and Buis, A.                                                                                                                                                                                                                  | Provision of prosthetic and orthotic services in low-income countries: A review of the literature                                                                                           | 2013 | Not population-based/representative |
| 215 | Congdon, N. G. and Ma, X. and Zhou, Z. and Yi, H. and Pang, X. and Shi, Y. and Chen, Q. and Meltzer, M. and He, M. and Rozelle, S.                                                                                                                           | Provision of spectacles improves academic performance of primary school children in a randomized trial in China                                                                             | 2014 | Full text not available             |
| 216 | Green, G. and Young, J.                                                                                                                                                                                                                                      | provision of wheelchairs for older people in the United Kingdom                                                                                                                             | 2011 | Not population-based/representative |
| 217 | Jan, C. and Kang, M. T. and Li, S. and Mitchell, P. and Rose, K. A. and Congdon, N. G. and Wang, N.                                                                                                                                                          | Pseudomyopia in China: Prevalence and impact of inaccurate spectacle power among Chinese children of different ages                                                                         | 2017 | Full text not available             |
| 218 | Congdon, N. and Li, L. and Zhang, M. and Yang, A. and Gao, Y. and Griffiths, S. and Wu, J. and Sharma, A. and Lam, D. S. C.                                                                                                                                  | Randomized, controlled trial of an educational intervention to promote spectacle use in rural China: The see well to learn well study                                                       | 2011 | Not population-based/representative |
| 219 | Humanity & Inclusion                                                                                                                                                                                                                                         | Rapid Assessment of Disability in Kurigram and Narsingdi, Bangladesh                                                                                                                        | 2017 | Full text not available             |
| 220 | Al-Taryar, R; Humbert, T; et al.                                                                                                                                                                                                                             | Rapid assessment on access to assistive technology in the World Health Organization's European Region                                                                                       | 2019 | No new AP indicator                 |
| 221 | Khan, S.                                                                                                                                                                                                                                                     | Rapid assistive technology assessment: Survey on the use and demand for assistive products in Pakistan                                                                                      | 2019 | Full text not available             |
| 222 | Hiscock, D.                                                                                                                                                                                                                                                  | rapid needs analysis for North East Syria: Key findings on age, disability and technology                                                                                                   | 2019 | Not population-based/representative |
| 223 | Smeeth, L. and Fletcher, A. E. and Ng, E. S. W. and Stirling, S. and Nunes, M. and Breeze, E. and Bulpitt, C. J. and Jones, D. and Tulloch, A.                                                                                                               | Reduced hearing, ownership, and use of hearing aids in elderly people in the UK - The MRC trial of the assessment and management of older people in the community: A cross-sectional survey | 2002 | Data collected before 2000          |
| 224 | Nacouzi, R. P. and Baz, P.                                                                                                                                                                                                                                   | Refractive disorders in a group of the Lebanese population of Armenian descent: A pilot study                                                                                               | 2010 | Full text not available             |
| 225 | Trabucco, P. and Salomone, M. and Domanico, I. and Gerace, E. and Carnevale, C. and Vingolo, E.                                                                                                                                                              | Refractive error and amblyopia in A schoolchildren population of central Italy                                                                                                              | 2013 | Full text not available             |
| 226 | Kannan, U. and Rajendiran, A. and Yeraballi, D. and Shanmugavel, K. and John, N. A. and Rene, S.                                                                                                                                                             | Refractive error and associated risk factors in 6-12 years schoolchildren                                                                                                                   | 2016 | No new AP indicator                 |
| 227 | Brian, G. and Pearce, M. G. and Ramke, J.                                                                                                                                                                                                                    | Refractive error and presbyopia among adults in Fiji                                                                                                                                        | 2011 | Full text not available             |

|     |                                                                                                                                                                                                                                                |                                                                                                                                          |      |                                     |
|-----|------------------------------------------------------------------------------------------------------------------------------------------------------------------------------------------------------------------------------------------------|------------------------------------------------------------------------------------------------------------------------------------------|------|-------------------------------------|
| 228 | Jeganathan, V. S. E. and Robin, A. L. and Woodward, M. A.                                                                                                                                                                                      | Refractive error in underserved adults: Causes and potential solutions                                                                   | 2017 | Not population-based/representative |
| 229 | Nguyen, A. and Guo, X. and Inns, A. and Kretz, A. M. and Mukherjee, M. R. and Friedman, D. S. and Repka, M. X. and Collins, M. E.                                                                                                              | Refractive error prevalence among inner-city students receiving school-based vision screenings and eye exams                             | 2019 | Full text not available             |
| 230 | Schiefer, Ulrich and Kraus, Christina and Baumbach, Peter and UngewiÄŸ, Judith and Michels, Ralf                                                                                                                                               | Refractive errors                                                                                                                        | 2016 | Not population-based/representative |
| 231 | Nonon Saa, K. B. and Atobian, K. and Banla, M. and Redah, T. and Maneh, N. and Walser, A.                                                                                                                                                      | Refractive errors among schoolchildren in the central region of Togo                                                                     | 2013 | No new AP indicator                 |
| 232 | Zain-Ur-Rehman, M. and Ahmad, S. R. and Mariya, Syed                                                                                                                                                                                           | Refractive errors among school-going children in Hyderabad                                                                               | 2017 | Not population-based/representative |
| 233 | Loukil, I. and Naija, O. and Hachicha, F. and Mallouch, N. and Slim, B. and Bhiri, R. and Hijazi, A.                                                                                                                                           | Refractive errors and visual impairment in Tunisian children                                                                             | 2011 | Full text not available             |
| 234 | Yingyong, P.                                                                                                                                                                                                                                   | Refractive errors survey in primary school children (6-12 year Old) in 2 provinces: Bangkok and Nakhonpathom (one year result)           | 2010 | Full text not available             |
| 235 | Schuster, Alexander Karl-Georg and Pfeiffer, Norbert and Schulz, Andreas and Hoehn, Rene and Ponto, Katharina A. and Wild, Philipp S. and Blettner, Maria and Beutel, Manfred E. and Lackner, Karl J. and Munzel, Thomas and Mirshahi, Alireza | Refractive, corneal and ocular residual astigmatism: distribution in a German population and age-dependency - the Gutenberg health study | 2017 | Not population-based/representative |
| 236 | Hlayisi, V. G.; Ramma, L.;                                                                                                                                                                                                                     | Rehabilitation for disabling hearing loss: evaluating the need relative to provision of hearing aids in the public health care system    | 2019 | Not population-based/representative |
| 237 | Golovanova, L. E. and Boboshko, M. Iu and Takhtaeva, N. Iu and Zhilinskaia, E. V.                                                                                                                                                              | Rehabilitation in elderly people with hearing loss                                                                                       | 2014 | Full text not available             |
| 238 | Lynch, C. D. and Liu, X. H. and Landon, M. B.                                                                                                                                                                                                  | Reproductive outcomes among women with a disability in the United States                                                                 | 2012 | Full text not available             |
| 239 | Ulusoy, S. and Ugras, H. and Cingi, C. and Yilmaz, H. B. and Muluk, N. B.                                                                                                                                                                      | results of national newborn hearing screening (NNHS) data of 11,575 newborns from west part of Turkey                                    | 2014 | Not population-based/representative |
| 240 | Daykhes, N. A. and Grigor'eva, E. A. and Nazarovchkin, Yu V. and Davydov, V. M. and Kuznetsov, A. O.                                                                                                                                           | results of universal audiological screening of newborn infants in the Astrakhan region]                                                  | 2017 | Full text not available             |
| 241 | Razavi, H. and Burrow, S. and Trzesinski, A.                                                                                                                                                                                                   | Review of eye health among Aboriginal and Torres Strait Islander people                                                                  | 2018 | No new AP indicator                 |
| 242 | Lindgren, B.                                                                                                                                                                                                                                   | rise in life expectancy, health trends among the elderly, and the demand for care - a selected literature review                         | 2016 | Not population-based/representative |
| 243 | Seymour, N.                                                                                                                                                                                                                                    | role of community-based rehabilitation (CBR) in effective wheelchair service provision                                                   | 2015 | Full text not available             |
| 244 | Gonsalves, Sarita and Ganagi, Srinivas and Vivedkanad, U.                                                                                                                                                                                      | School screening in Coastal Karnataka                                                                                                    | 2019 | Not population-based/representative |
| 245 | Sharma, Abhishek and Congdon, Nathan and Patel, Mehul and Gilbert, Clare                                                                                                                                                                       | School-based approaches to the correction of refractive error in children                                                                | 2012 | No new AP indicator                 |
| 246 | Sherwin, J. C. and Dean, W. H. and Metcalfe, N.                                                                                                                                                                                                | Screening for childhood blindness and visual impairment in a secondary school in rural Malawi                                            | 2011 | Not population-based/representative |
| 247 | Frick, K. D. and Riva-Clement, L. and Shankar, M. B.                                                                                                                                                                                           | Screening for refractive error and fitting with spectacles in rural and urban India: Cost-effectiveness                                  | 2009 | No new AP indicator                 |
| 248 | Setti, A. and Bhuachalla, B. N. and Savva, G. M. and Kenny, R. A.                                                                                                                                                                              | Self-rated vision and cognitive function in the irish population                                                                         | 2012 | Full text not available             |
| 249 | Brennanâ€• Jones, Christopher G. and Taljaard, Dunay S. and Brennanâ€• Jones, Sophie E. F. and Bennett, Rebecca J. and Swanepoel, De Wet and Eikelboom, Robert H.                                                                              | Self-reported hearing loss and manual audiometry: A rural versus urban comparison                                                        | 2016 | Not population-based/representative |
| 250 | Li, C. F. and Lo, J. C. and Lau, G. C. and Gordon, N. P.                                                                                                                                                                                       | Self-reported hearing loss and use of hearing aids in older adults                                                                       | 2019 | Full text not available             |
| 251 | Bazargan, M. and Baker, R. S. and Bazargan, S. H.                                                                                                                                                                                              | Sensory impairments and subjective well-being among aged African American persons                                                        | 2001 | Data collected before 2000          |
| 252 | Ngô, G. and Trope, G. and Buys, Y. and Jin, Y. P.                                                                                                                                                                                              | Significant disparities in eyeglass insurance coverage in Canada                                                                         | 2018 | No new AP indicator                 |
| 253 | Vincent, J. E.                                                                                                                                                                                                                                 | Simple spectacles for adult refugees on the Thailand-Burma border                                                                        | 2006 | Full text not available             |
| 254 | Carlson, D. and Ehrlich, N.                                                                                                                                                                                                                    | Sources of payment for assistive technology: findings from a national survey of persons with disabilities                                | 2006 | Not population-based/representative |
| 255 | Mudie, L. and Huang, A. and Mukherjee, R. and Madden, N. and Slavin, R. and Oweye, J. and Friedman, D. S. and Repka, M. X. and Collins, M. E.                                                                                                  | Spectacle correction and reading ability in a school-based vision study in inner-city baltimore                                          | 2017 | Full text not available             |



|     |                                                                                                                                                                                       |                                                                                                                                                                                                           |      |                                     |
|-----|---------------------------------------------------------------------------------------------------------------------------------------------------------------------------------------|-----------------------------------------------------------------------------------------------------------------------------------------------------------------------------------------------------------|------|-------------------------------------|
| 256 | Gupta, V. and Saxena, R. and Vashist, P. and Bhardwaj, A. and Pandey, R. M. and Tandon, R. and Menon, V.                                                                              | Spectacle Coverage among Urban Schoolchildren with Refractive Error Provided Subsidized Spectacles in North India                                                                                         | 2019 | Full text not available             |
| 257 | Marmamula, S. and Ravuri, L. V. C. S. and Boon, M. Y. and Khanna, R. C.                                                                                                               | Spectacle coverage and spectacles use among elderly population in residential care in the south Indian state of Andhra Pradesh                                                                            | 2013 | Not population-based/representative |
| 258 | Vasconcelos, G. C. and Cavascan, N. N. and Berezovsky, A. and Cunha, C. C. and Munoz, S. and Furtado, J. M. and Cohen, J. M. and Cohen, M. J. and Belfort, R. and Salomao, S. R.      | Spectacle coverage in older adults from parintins: The Brazilian Amazon region eye survey (BARES)                                                                                                         | 2016 | Full text not available             |
| 259 | Aravind Eye Hospital                                                                                                                                                                  | Spectacle dispensing for myopia at primary eye care level                                                                                                                                                 | 2019 | No new AP indicator                 |
| 260 | Barria Von-Bischoffshausen, F. and Munoz, B. and Riquelme, A. and Ormeno, M. J. and Silva, J. C.                                                                                      | Spectacle-wear compliance in school children in Concepcion Chile                                                                                                                                          | 2014 | Not population-based/representative |
| 261 | Salomao, S. R. and Munoz, S. and Furtado, J. M. and Ferraz, A. N. and Berezovsky, A. and Cavascan, N. N. and Sacai, P. Y. and Mitsuhiro, M. R. K. H. and Cohen, J. M. and Belfort, R. | Study design and methods for a population-based study on the prevalence and causes of distance and near vision impairment and blindness in parintins city: The Brazilian amazon region eye survey (BARES) | 2016 | Full text not available             |
| 262 | Lin, Jin-Ding and Li, Chien-De and Lin, Lan-Ping and Hsu, Shang-Wei                                                                                                                   | study of geographic differences in the prevalence of disability among Taiwanese population                                                                                                                | 2012 | No new AP indicator                 |
| 263 | Manasa, G. and Seran Kumar Reddy, M. and Sai Spporthy, M. and Nisar, S. and Vamsidhar and Naik, B. S.                                                                                 | study of prevalence of undetected refractive errors among school children in Kadapa                                                                                                                       | 2012 | Full text not available             |
| 264 | Pannell, L.; Seymour, N.                                                                                                                                                              | Sustainability of wheelchair service provision: Perspectives from service providers                                                                                                                       | 2019 | Not population-based/representative |
| 265 | Bright, T. and Wallace, S. and Kuper, H.                                                                                                                                              | systematic review of access to rehabilitation for people with disabilities in low-and middle-income countries                                                                                             | 2018 | Not population-based/representative |
| 266 | PEEK                                                                                                                                                                                  | The Peek Approach to Measuring and Creating Impact                                                                                                                                                        | 2019 | No new AP indicator                 |
| 267 | Garcia, Y; Pearlman, J; Rosen, P.                                                                                                                                                     | The wheelchair user's voice: Preliminary results related to unmet need for assistive technology in Indonesia and El Salvador                                                                              | 2019 | Not population-based/representative |
| 268 | Cheng, Yiling J. and Gregg, Edward W. and Saaddine, Jinan B. and Imperatore, Giuseppina and Zhang, Xinzhi and Albright, Ann L.                                                        | Three decade change in the prevalence of hearing impairment and its association with diabetes in the United States                                                                                        | 2009 | No new AP indicator                 |
| 269 | Ajith, S. and Sandhya, R.                                                                                                                                                             | To study the prevalence of refractory errors in school children                                                                                                                                           | 2015 | No new AP indicator                 |
| 270 | Ntodie, M. and Danquah, L. and Kandel, H. and Abokyi, S.                                                                                                                              | Toward eliminating blindness due to uncorrected refractive errors: assessment of refractive services in the northern and central regions of Ghana                                                         | 2014 | Not population-based/representative |
| 271 | Holden, Brien A. and Tahhan, Nina and Jong, Monica and Wilson, David A. and Fricke, Timothy R. and Bourne, Rupert and Resnikoff, Serge                                                | Towards better estimates of uncorrected presbyopia                                                                                                                                                        | 2015 | Full text not available             |
| 272 | Varadaraj, V. and Frick, K. D. and Saaddine, J. B. and Friedman, D. S. and Swenor, B. K.                                                                                              | Trends in Eye Care Use and Eyeglasses Affordability: The US National Health Interview Survey, 2008-2016                                                                                                   | 2019 | No new AP indicator                 |
| 273 | Lee, D. J. and Arheart, K. L. and Lam, B. L. and Zheng, D. and Christ, S. L. and McCollister, K. E. and Davila, E. P. and Caban-Martinez, A. J.                                       | Trends in reported visual impairment in United States adults                                                                                                                                              | 2009 | No new AP indicator                 |
| 274 | Lai, Der-Chung and Tseng, Yen-Cheng and Guo, How-Ran                                                                                                                                  | Trends in the prevalence of childhood disability: Analysis of data from the national disability registry of Taiwan, 2000-2011                                                                             | 2013 | No new AP indicator                 |
| 275 | Warkad, Vivekanand U. and Panda, Lapam and Behera, Pradeep and Das, Taraprasad and Mohanta, Bikash C. and Khanna, Rohit                                                               | Tribal Odisha Eye Disease Study (TOES) I: prevalence and causes of visual impairment among tribal children in an urban school in Eastern India                                                            | 2018 | No new AP indicator                 |
| 276 | Giloyan, A. and Harutyunyan, T. and Petrosyan, V.                                                                                                                                     | Uncorrected refractive error and associated risk factors among socially vulnerable older adult population living in Armenia                                                                               | 2018 | Not population-based/representative |
| 277 | Ehrlich, J. R. and Laoh, A. and Kourgialis, N. and Prasetyanti, W. and Zakiyah, R. and Faillace, S. and Friedman, D. S.                                                               | Uncorrected refractive error and presbyopia among junior high school teachers in Jakarta, Indonesia                                                                                                       | 2013 | Not population-based/representative |
| 278 | Uribe, J. A. and Swenor, B. K. and Munoz, B. E. and West, S. K.                                                                                                                       | Uncorrected refractive error in a latino population: Proyecto VER                                                                                                                                         | 2011 | Data collected before 2000          |
| 279 | Saw, S. M. and Foster, P. J. and Gazzard, G. and Friedman, D. and Hee, J. and Seah, S.                                                                                                | Uncorrected refractive error in Singaporean Chinese adults: The Tanjong Pagar survey                                                                                                                      | 2004 | Data collected before 2000          |
| 280 | Harrington, Christina N. and Mitzner, Tracy L. and Rogers, Wendy A.                                                                                                                   | Understanding the role of technology for meeting the support needs of older adults in the USA with functional limitations                                                                                 | 2015 | No new AP indicator                 |
| 281 | McColl, M. A. and Jarzynowska, A. and Shortt, S. E. D.                                                                                                                                | Unmet health care needs of people with disabilities: population level evidence                                                                                                                            | 2010 | Data collected before 2000          |
| 282 | Dusing, Stacey C. and Skinner, Asheley Cockrell and Mayer, Michelle L.                                                                                                                | Unmet Need for Therapy Services, Assistive Devices, and Related Services: Data From the National Survey of Children                                                                                       | 2004 | No new AP indicator                 |



|     |                                                                                                                                                                                        | With Special Health Care Needs                                                                                                                                                                 |      |                                     |
|-----|----------------------------------------------------------------------------------------------------------------------------------------------------------------------------------------|------------------------------------------------------------------------------------------------------------------------------------------------------------------------------------------------|------|-------------------------------------|
| 283 | Abhishek, Sharma and Li, LiPing and Song, Yue and Choi, Kai and Lam, D. S. C. and Zhang, MingZhi and Zheng, MingWei and Zhou, ZhongXia and Liu, XiaoJian and Wu, Bin and Congdon, N.   | Strategies to improve the accuracy of vision measurement by teachers in rural Chinese secondary schoolchildren: Xichang Pediatric Refractive Error Study (X-PRES) Report No. 6                 | 2008 | No new AP indicator                 |
| 284 | Mitra, M. and Bogen, K. and Long-Bellil, L. M. and Heaphy, D.                                                                                                                          | Unmet needs for home and community-based services among persons with disabilities in Massachusetts                                                                                             | 2011 | No new AP indicator                 |
| 285 | Emamian, M. H. and Zeraati, H. and Majdzadeh, R. and Shariati, M. and Hashemi, H. and Fotouhi, A.                                                                                      | Unmet refractive need and its determinants in Shahroud, Iran                                                                                                                                   | 2012 | Full text not available             |
| 286 | Clarke, N. and Shacks, J. and Kerr, A. R. E. and Bottrell, C. L. and Poulsen, M. K. and Yin, L.                                                                                        | Use of a noncycloplegic autorefractor to perform vision screening in preschools                                                                                                                | 2008 | Not population-based/representative |
| 287 | Kwok-Tak Yeung 1 2 , Chung-Hui Lin 1 2 , Ya-Ling Teng 1 2 , Fen-Fen Chen 1 2 , Shu-Zon Lou 1 2 , Chiung-Ling Chen                                                                      | Use of and Self-Perceived Need for Assistive Devices in Individuals with Disabilities in Taiwan                                                                                                | 2016 | Not population-based/representative |
| 288 | Ryskulova, A. and Klein, R. and Cotch, M. F.                                                                                                                                           | Use of eye care services among U.S. Children, 2002 and 2008                                                                                                                                    | 2010 | Full text not available             |
| 289 | Hartley, D. and Rochtchina, E. and Newall, P. and Golding, M. and Mitchell, P.                                                                                                         | Use of hearing aids and assistive listening devices in an older australian population                                                                                                          | 2010 | Full text not available             |
| 290 | Clarke, P. and Chan, P. and Santaguida, P. L. and Colantonio, A.                                                                                                                       | use of mobility devices among institutionalized older adults                                                                                                                                   | 2009 | Not population-based/representative |
| 291 | Heerkens, Y. and Bougie, T. and Claus, E.                                                                                                                                              | use of the ICF in the process of supplying assistive products: Discussion paper based on the experience using a general Dutch prescription guideline                                           | 2011 | No new AP indicator                 |
| 292 | Desideri, L; Salatino, C; et al.                                                                                                                                                       | Using a standard procedure to assess assistive technology service delivery outcomes: A proposal from the Italian Network of Independent Assistive Technology Centres                           | 2019 | No new AP indicator                 |
| 293 | Duke, Roseline and Otong, Eyoawan and Iso, Maureen and Okorie, Uche and Ekwe, Asuquo and Courtright, Paul and Lewallen, Susan                                                          | Using key informants to estimate prevalence of severe visual impairment and blindness in children in Cross River State, Nigeria                                                                | 2013 | No new AP indicator                 |
| 294 | Zhang, X. and Cotch, M. F. and Ryskulova, A. and Primo, S. A. and Nair, P. and Chou, C. F. and Geiss, L. S. and Barker, L. E. and Elliott, A. F. and Crews, J. E. and Saaddine, J. B.  | Vision health disparities in the United States by race/ethnicity, education, and economic status: Findings from two nationally representative surveys                                          | 2012 | No new AP indicator                 |
| 295 | Unsal, A. and Ayranci, U. and Tozun, M.                                                                                                                                                | Vision screening among children in primary schools in a district of western Turkey: An epidemiological study                                                                                   | 2009 | Not population-based/representative |
| 296 | Ketaki, Bagchi and Subhra, Nag and Tutul, Chattopadhyaya and Amit, Dan                                                                                                                 | Vision screening programme among school children - evaluation of the outcome in a selected urban locality                                                                                      | 2008 | Full text not available             |
| 297 | Marcela Colussi Cypel 1 , Solange Rios Salomão 1 , Paulo Elias Correa Dantas 2 , Claudio Luiz Lottenberg 3 , Niro Kasahara 2 , Luiz Roberto Ramos 4 , Rubens Belfort Jr                | Vision status, ophthalmic assessment, and quality of life in the very old                                                                                                                      | 2017 | Not population-based/representative |
| 298 | Solange R. Salomão; Márcia R. K. H. Mitsuhiro; Rubens Belfort Jr                                                                                                                       | Visual impairment and blindness: An overview of prevalence and causes in Brazil                                                                                                                | 2009 | No new AP indicator                 |
| 299 | Yekta, Reyhaneh and Hashemi, Hassan and Pakzad, Reza and Jafari, Asieh and Yekta, Abbasali and Heravian, Javad and Ostadimoghaddam, Hadi and Valadkhan, Mehrnaz and Khabazkhoob, Mehdi | Visual impairment and some of ocular problem in nursing home residents                                                                                                                         | 2019 | Not population-based/representative |
| 300 | Guo, Yin and Liu, Lijuan and Xu, Liang and Lv, YanYun and Tang, Ping and Feng, Yi and Meng, Lei and Jonas, J. B.                                                                       | Visual impairment and spectacle use in schoolchildren in rural and urban regions in Beijing                                                                                                    | 2014 | Not population-based/representative |
| 301 | Wei, S. and Sun, Y. and Wang, N.                                                                                                                                                       | Visual impairment and spectacle use in university students in central China: The Anyang University Students Eye Study                                                                          | 2019 | Not population-based/representative |
| 302 | Abokyi, S. and Ilechie, A. and Nsiah, P. and Darko-Takyi, C. and Abu, E. K. and Osei-Akoto, Y. J. and Youfegan-Baanam, M.                                                              | Visual impairment attributable to uncorrected refractive error and other causes in the Ghanaian youth: The University of Cape Coast Survey                                                     | 2016 | Not population-based/representative |
| 303 | Srinivas, Marmamula and Saggam, Narsaiah and Konegari, Shekhar and Khanna, R. C. and Rao, G. N.                                                                                        | Visual impairment in the South Indian state of Andhra Pradesh: Andhra Pradesh - Rapid Assessment of Visual Impairment (AP-RAVI) project                                                        | 2013 | No new AP indicator                 |
| 304 | Owsley, Cynthia; McGwin, Gerald; Scilley, Kay                                                                                                                                          | visual status of older persons residing in nursing homes                                                                                                                                       | 2007 | Not population-based/representative |
| 305 | Cox, D. L.                                                                                                                                                                             | Wheelchair needs for children and young people: a review                                                                                                                                       | 2003 | No new AP indicator                 |
| 306 | Allen, M. and Gowran, R. J. and Goldberg, M. and Pearlman, J.                                                                                                                          | Wheelchair stakeholders meeting 2018 - Developing a global wheelchair sector report with priority actions toward sustainable wheelchair provision: Appropriate wheelchairs, a global challenge | 2019 | Full text not available             |

|     |                               |                                                                                                        |      |                         |
|-----|-------------------------------|--------------------------------------------------------------------------------------------------------|------|-------------------------|
| 307 | Clarke, P. and Colantonio, A. | Wheelchair use among community-dwelling older adults: Prevalence and risk factors in a national sample | 2005 | Full text not available |
|-----|-------------------------------|--------------------------------------------------------------------------------------------------------|------|-------------------------|

## Appendix 7: Hearing Aid Indicators

| Citation                  | Tool, Survey, or Dataset                         | Study Design              | Approaches                              | Ages  | Participants | JBI Score             | Functional Difficulty Threshold | WHO Region | Country        | AP access Indicator |             |       |                                  |
|---------------------------|--------------------------------------------------|---------------------------|-----------------------------------------|-------|--------------|-----------------------|---------------------------------|------------|----------------|---------------------|-------------|-------|----------------------------------|
|                           |                                                  |                           |                                         |       |              |                       |                                 |            |                | Indicator           | Calculation | (%)   | Denominator                      |
| Muga, 2003[16]            | None                                             | Cross-sectional           | Functional; Self-report                 | 2-9   | 399          | 4 [1, 3, 4, 7, 9, 10] | RAL                             | AFR        | Kenya          | Need                | 3/399       | 0.8%  | Total participants               |
| Rios et al, 2014[17]      | Assistive Technology Banks (BAT) Client Database | Secondary cross-sectional | Clinical                                | 0-100 | 839          | 8 [2, 10]             | AP use                          | AMR        | Colombia       | Has AP              | 224/839     | 26.7% | Total participants               |
| Vuorialho et al, 2004[18] | None                                             | Secondary cross-sectional | Clinical                                | 0-100 | 455200       | 7 [1, 4, 10]          | HL>30dB                         | EUR        | Finland        | Has AP              | 1294/839    | 89.1% | Total with need                  |
| Nash et al, 2013[19]      | Beaver Dam Offspring Study                       | Secondary cross-sectional | Clinical; Self-report                   | 21-84 | 3130         | 10                    | HL>25dB                         | AMR        | United States  | Use                 | 42/401      | 10.5% | Total with functional difficulty |
| Dawes et al, 2014[20]     | UK Biobank Resource                              | Secondary cross-sectional | Functional; Single-question self-report | 40-69 | 164770       | 9 [2]                 | AP use; Digit Triplet Test      | EUR        | United Kingdom | Use                 | 3295/164770 | 2.0%  | Total participants               |
| Sawyer et al, 2019[21]    | UK Biobank Resource                              | Secondary cross-sectional | Functional; Single-question self-report | 40-69 | 18730        | 9 [9]                 | AP use; Digit Triplet Test      | EUR        | United Kingdom | Use                 | 1732/18730  | 9.2%  | Total with functional difficulty |
|                           |                                                  |                           |                                         |       |              |                       |                                 |            |                | Unmet               | 16963/18730 | 90.6% | Total with functional difficulty |
| Boggs et al, 2019[22]     | WGQ Child Functioning Module; WGQ Extended set   | Secondary cross-sectional | Clinical; Self-report                   | 0+    | 7135         | 8 [4, 8]              | HL>41dB; RAL                    | AFR        | Cameroon       | Coverage            | 3/43        | 7.0%  | Total with need                  |
|                           |                                                  |                           |                                         |       |              |                       |                                 |            |                | Need                | 43/3572     | 1.2%  | Total participants               |
|                           |                                                  |                           |                                         |       |              |                       |                                 |            |                | Unmet               | 40/43       | 93.0% | Total with need                  |
|                           |                                                  |                           |                                         |       |              |                       |                                 |            |                | Use                 | 3/3572      | 0.1%  | Total participants               |
|                           |                                                  |                           |                                         |       |              |                       |                                 | SEAR       | India          | Coverage            | 5/112       | 4.5%  | Total with need                  |
|                           |                                                  |                           |                                         |       |              |                       |                                 |            |                | Need                | 112/3563    | 3.1%  | Total participants               |
|                           |                                                  |                           |                                         |       |              |                       |                                 |            |                | Unmet               | 107/112     | 95.5% | Total with need                  |
|                           |                                                  |                           |                                         |       |              |                       |                                 |            |                | Use                 | 5/3563      | 0.1%  | Total participants               |
| Orji et al, 2020[23]      | GBD; National                                    | Secondary                 | Multiple                                | 0+    | N/A          | 10                    | HL>=35dB                        | AFR        |                | Use                 | 3.6/36.6*   | 9.8%  | Total with                       |

|                             |                                                                                                                                             |                 |                       |    |      |       |         |        |         |       |              |       |                                  |
|-----------------------------|---------------------------------------------------------------------------------------------------------------------------------------------|-----------------|-----------------------|----|------|-------|---------|--------|---------|-------|--------------|-------|----------------------------------|
|                             | Health and Nutrition Examination Survey; Multi-Country Survey Study on Health and Responsiveness; Studies on Global Ageing and Adult Health | cross-sectional | secondary sources     |    |      |       |         |        |         |       |              |       | need                             |
|                             |                                                                                                                                             |                 |                       |    |      |       |         |        |         | Unmet | 33/36.6*     | 90.2% | Total with need                  |
|                             |                                                                                                                                             |                 |                       |    |      |       |         | AMR    |         | Use   | 9.9/59.4*    | 16.7% | Total with need                  |
|                             |                                                                                                                                             |                 |                       |    |      |       |         |        |         | Unmet | 49.5/59.4*   | 83.3% | Total with need                  |
|                             |                                                                                                                                             |                 |                       |    |      |       |         | EMR    |         | Use   | 3.3/21.1*    | 15.6% | Total with need                  |
|                             |                                                                                                                                             |                 |                       |    |      |       |         |        |         | Unmet | 17.8/21.1*   | 84.4% | Total with need                  |
|                             |                                                                                                                                             |                 |                       |    |      |       |         | EUR    |         | Use   | 12.3/545*    | 2.3%  | Total with need                  |
|                             |                                                                                                                                             |                 |                       |    |      |       |         |        |         | Unmet | 42.2/545*    | 7.7%  | Total with need                  |
|                             |                                                                                                                                             |                 |                       |    |      |       |         | Global |         | Use   | 67.9/401.4*  | 16.9% | Total with need                  |
|                             |                                                                                                                                             |                 |                       |    |      |       |         |        |         | Unmet | 333.5/401.4* | 83.1% | Total with need                  |
|                             |                                                                                                                                             |                 |                       |    |      |       |         | SEAR   |         | Use   | 15.7/102.3*  | 15.3% | Total with need                  |
|                             |                                                                                                                                             |                 |                       |    |      |       |         |        |         | Unmet | 86.5/102.3*  | 84.6% | Total with need                  |
|                             |                                                                                                                                             |                 |                       |    |      |       |         | WPR    |         | Use   | 22.8/125.6*  | 18.2% | Total with need                  |
|                             |                                                                                                                                             |                 |                       |    |      |       |         |        |         | Unmet | 102.9/125.6* | 81.9% | Total with need                  |
| Gondim et al, 2012[24]      | None                                                                                                                                        | Cross-sectional | Clinical; Self-report | 4+ | 379  | 10    | HL>25dB | AMR    | Brazil  | Need  | 18/379       | 4.7%  | Total participants               |
| Danquah et Brus, 2013[25]   | WGQ Short set                                                                                                                               | Mixed-methods   | Self-report           | 5+ | 3122 | 10    | RAL     | AMR    | Haiti   | Unmet | 35/178       | 19.7% | Total with functional difficulty |
|                             |                                                                                                                                             |                 |                       |    |      |       |         |        |         | Use   | 8/178        | 4.5%  | Total with functional difficulty |
| von Gablenz et al, 2017[26] | Aalen Survey; HÖRSTAT                                                                                                                       | Cross-sectional | Clinical; Self-report | 7+ | 1866 | 9 [9] | HL>25dB | EUR    | Germany | Use   | 162/3105     | 5.2%  | Total participants               |

| Study                     |                                                                              |                           |                         |       |       |           |              |      |               |        |                 |       |                                                   |
|---------------------------|------------------------------------------------------------------------------|---------------------------|-------------------------|-------|-------|-----------|--------------|------|---------------|--------|-----------------|-------|---------------------------------------------------|
| Berardi et al, 2020[27]   | Canadian Survey on Disability                                                | Secondary cross-sectional | Self-report             | 15+   | 45443 | 10        | RAL          | AMR  | Canada        | Unmet  | 237560/27561460 | 0.9%  | Total population                                  |
|                           |                                                                              |                           |                         |       |       |           |              |      |               | Use    | 314470/27561460 | 1.1%  | Total population                                  |
| Angara et Snapp, 2018[28] | National Health and Nutritional Examination Survey                           | Secondary cross-sectional | Clinical; Self-report   | 18+   | 3701  | 8 [2, 10] | HL>25dB      | AMR  | United States | Use    | 125/505         | 24.8% | Total with functional difficulty                  |
| Li et al, 2018[29]        | Behavioral Risk Factor Surveillance System; National Health Interview Survey | Secondary cross-sectional | Functional; Self-report | 18+   | 18391 | 10        | RAL          | AMR  | United States | Use    | 827/41339       | 2.0%  | Total participants                                |
| Pryor et al, 2018[30]     | ATA-N, RAD, WGQ                                                              | Cross-sectional           | Self-report             | 18+   | 4253  | 9 [4]     | AP use       | SEAR | Bangladesh    | Use    | 1/112           | 0.9%  | Total with functional difficulty and using any AP |
| Moon et al, 2015[31]      | Korea National Health and Nutrition Examination Survey                       | Secondary cross-sectional | Clinical; Self-report   | 40+   | 12709 | 10        | HL>40dB; RAL | WPR  | South Korea   | Has AP | 94/530          | 17.7% | Total with functional difficulty                  |
|                           |                                                                              |                           |                         |       |       |           |              |      |               | Use    | 69/530          | 13.0% | Total with functional difficulty                  |
| Gopinath et al, 2011[32]  | Blue Mountains Eye Study                                                     | Cross-sectional           | Clinical; Self-report   | 55-99 | 1371  | 8 [2, 10] | HL>25dB      | WPR  | Australia     | Has AP | 147/1371        | 10.7% | Total participants                                |
|                           |                                                                              |                           |                         |       |       |           |              |      |               | Unmet  | 318/456         | 69.7% | Total with functional difficulty                  |
|                           |                                                                              |                           |                         |       |       |           |              |      |               | Use    | 103/138         | 74.6% | Total with AP                                     |
| Corna et al, 2009[33]     | Canadian Community Health Survey                                             | Secondary cross-sectional | Self-report             | 50+   | 43168 | 10        | RAL          | AMR  | Canada        | Met    | 2461/43168      | 5.7%  | Total participants                                |
|                           |                                                                              |                           |                         |       |       |           |              |      |               | Unmet  | 1080/43168      | 2.5%  | Total participants                                |
| Mitchell et al, 2011[34]  | Blue Mountains Hearing Study                                                 | Cohort                    | Clinical; Self-report   | 55+   | 1556  | 9 [10]    | HL>25dB      | WPR  | Australia     | Use    | 921/1938        | 47.5% | Total with functional difficulty                  |
| Kim, 2015[35]             | Korean National Health and Nutrition                                         | Secondary cross-sectional | Clinical; Self-report   | 60+   | 5447  | 10        | HL>40dB      | WPR  | South Korea   | Need   | 2680/5447       | 49.2% | Total participants                                |

|                                      |                                                                              |                           |                       |     |      |           |               |     |               |          |          |          |       |                                  |
|--------------------------------------|------------------------------------------------------------------------------|---------------------------|-----------------------|-----|------|-----------|---------------|-----|---------------|----------|----------|----------|-------|----------------------------------|
|                                      | Examination Survey                                                           |                           |                       |     |      |           |               |     |               |          | Unmet    | 746/2680 | 27.8% | Total with functional difficulty |
|                                      |                                                                              |                           |                       |     |      |           |               |     |               |          | Use      | 142/2680 | 5.3%  | Total with functional difficulty |
| Siti Zamratol-Mai et al, 2016[36]    | Longitudinal study on neuroprotective model for healthy longevity (LRGS-TUA) | Cross-sectional           | Clinical; Self-report | 60+ | 382  | 8 [4, 10] | HL>25dB       | WPR | Malaysia      | Coverage | 13/279   |          | 4.7%  | Total with need                  |
| Chang et al, 2009[37]                | None                                                                         | Cross-sectional           | Clinical; Self-report | 65+ | 1220 | 10        | HL>=41dB      | WPR | Taiwan        | Unmet    | 59/1220  |          | 4.8%  | Total participants               |
|                                      |                                                                              |                           |                       |     |      |           |               |     |               | Use      | 26/1220  |          | 2.1%  | Total participants               |
| Lopez-Torres Hidalgo et al, 2008[38] | None                                                                         | Cross-sectional           | Clinical; Self-report | 65+ | 1162 | 10        | HL>=35dB      | EUR | Spain         | Need     | 486/1162 |          | 41.8% | Total with functional difficulty |
|                                      |                                                                              |                           |                       |     |      |           |               |     |               | Use      | 52/1162  |          | 4.5%  | Total with functional difficulty |
| Bainbridge et Ramachandran, 2014[39] | National Health and Nutrition Examination Survey                             | Secondary cross-sectional | Clinical; Self-report | 70+ | 1636 | 10        | HL>=35dB; RAL | AMR | United States | Need     | 601/1636 |          | 36.7% | Total participants               |
|                                      |                                                                              |                           |                       |     |      |           |               |     |               | Unmet    | 402/601  |          | 66.9% | Total with need                  |
|                                      |                                                                              |                           |                       |     |      |           |               |     |               | Use      | 199/601  |          | 33.1% | Total with need                  |
| Dupraz et al, 2020[40]               | 5-Country Oldest Old Project (5-COOP)                                        | Cross-sectional           | Clinical; Self-report | 100 | 1253 | 10        | AP use        | EUR | Denmark       | Has AP   | 161/251  |          | 64.1% | Total participants               |
|                                      |                                                                              |                           |                       |     |      |           |               |     | France        | Has AP   | 117/282  |          | 41.5% | Total participants               |
|                                      |                                                                              |                           |                       |     |      |           |               |     | Sweden        | Has AP   | 150/274  |          | 54.7% | Total participants               |
|                                      |                                                                              |                           |                       |     |      |           |               |     | Switzerland   | Has AP   | 86/170   |          | 50.6% | Total participants               |
|                                      |                                                                              |                           |                       |     |      |           |               | WPR | Japan         | Has AP   | 94/346   |          | 27.2% | Total participants               |



ATA-N=Assistive Technology Assessment-Needs. GBD=Global Burden of Disease dataset. RAD=Rapid Assessment of Disability. WQ=Washington Group Questions. RAL=self-reported activity limitations. HL=hearing loss.

*\*Results are presented in millions.*

Appendix 8: Mobility AP Indicators

| AP Type               | Citation                   | Tool, Survey, or Dataset                                       | Study Design              | Approaches              | Ages  | Participants | JBI Score | Functional Difficulty Threshold | WHO Region | Country        | AP access Indicator |                 |       |                                  |
|-----------------------|----------------------------|----------------------------------------------------------------|---------------------------|-------------------------|-------|--------------|-----------|---------------------------------|------------|----------------|---------------------|-----------------|-------|----------------------------------|
|                       |                            |                                                                |                           |                         |       |              |           |                                 |            |                | Indicator           | Calculation     | (%)   | Denominator                      |
| Limb prosthetics      | Rios et al, 2014[17]       | Assistive Technology Banks (BAT) Client Database               | Secondary cross-sectional | Clinical                | 0-100 | 839          | 8 [2, 10] | AP use                          | AMR        | Colombia       | Has AP              | 151/839         | 18.0% | Total participants               |
|                       | Pryor et al, 2018[30]      | ATA-N, RAD, WGQ                                                | Cross-sectional           | Self-report             | 18+   | 4253         | 9 [4]     | AP use                          | SEAR       | Bangladesh     | Use                 | 1/112           | 0.9%  | Total with functional difficulty |
| Motorised wheelchairs | Berardi et al, 2020[27]    | Canadian Survey on Disability                                  | Secondary cross-sectional | Self-report             | 15+   | 45443        | 10        | RAL                             | AMR        | Canada         | Unmet               | 32220/27561460  | 0.1%  | Total population                 |
|                       | Giesbrecht et al, 2017[41] | Canadian Survey on Disability                                  | Secondary cross-sectional | Self-report             | 15+   | 45442        | 10        | RAL                             | AMR        | Canada         | Unmet               | 2531649/3775920 | 67.0% | Total with functional difficulty |
|                       | Smith et al, 2016[42]      | Canadian Survey on Disability                                  | Secondary cross-sectional | Self-report             | 15+   | 45500        | 9 [10]    | AP use                          | AMR        | Canada         | Use                 | 150910/288800   | 52.3% | Total with AP                    |
|                       | Pryor et al, 2018[30]      | ATA-N, RAD, WGQ                                                | Cross-sectional           | Self-report             | 18+   | 4253         | 9 [4]     | AP use                          | SEAR       | Bangladesh     | Use                 | 1/112           | 0.9%  | Total with functional difficulty |
|                       | Gale et al, 2015[43]       | English Longitudinal Study of Aging; Health Survey for England | Secondary cross-sectional | Functional; Self-report | 60+   | 5450         | 9 [2]     | AP use; RAL                     | EUR        | United Kingdom | Use                 | 14/3371         | 0.4%  | Total with functional difficulty |
|                       | Gell et al, 2015[44]       | National Health and Aging Trends Study                         | Secondary cross-sectional | Self-report             | 65+   | 7609         | 10        | AP use                          | AMR        | United States  | Use                 | 815000/35000000 | 2.3%  | Total population                 |

|                                   |                                |                                                  |                           |                       |       |       |           |        |      |               |          |                 |       |                                  |
|-----------------------------------|--------------------------------|--------------------------------------------------|---------------------------|-----------------------|-------|-------|-----------|--------|------|---------------|----------|-----------------|-------|----------------------------------|
|                                   | Iwashyna et Christie, 2007[45] | Medicare Current Beneficiary Survey              | Secondary cross-sectional | Self-report           | 65+   | 4687  | 10        | RAL    | AMR  | United States | Use      | 25/835          | 3.0%  | Total with functional difficulty |
|                                   | Wolff et al, 2005[46]          | Medicare Current Beneficiary Survey              | Secondary cross-sectional | Clinical; Self-report | 65+   | 12691 | 9 [7]     | AP use | AMR  | United States | Has AP   | 158812/30000000 | 0.5%  | Total population                 |
| Manual or unspecified wheelchairs | Tataryn et al, 2017[47]        | None                                             | Cross-sectional           | Clinical; Self-report | 0-18  | 7220  | 9 [2]     | RAL    | AFR  | Malawi        | Need     | 87/1094         | 8.0%  | Total with functional difficulty |
|                                   | Rios et al, 2014[17]           | Assistive Technology Banks (BAT) Client Database | Secondary cross-sectional | Clinical              | 0-100 | 839   | 8 [2, 10] | AP use | AMR  | Colombia      | Has AP   | 461/839         | 54.9% | Total participants               |
|                                   | Boggs et al, 2019[22]          | WGQ Child Functioning Module; WGQ Extended set   | Secondary cross-sectional | Clinical; Self-report | 0+    | 7135  | 8 [4, 8]  | RAL    | AFR  | Cameroon      | Coverage | 0/4             | 0.0%  | Total with need                  |
|                                   |                                |                                                  |                           |                       |       |       |           |        |      |               | Need     | 4/3572          | 0.1%  | Total participants               |
|                                   |                                |                                                  |                           |                       |       |       |           |        |      |               | Unmet    | 4/3572          | 0.1%  | Total participants               |
|                                   |                                |                                                  |                           |                       |       |       |           |        |      |               | Use      | 0/3572          | 0.0%  | Total participants               |
|                                   |                                |                                                  |                           |                       |       |       |           |        | SEAR | India         | Coverage | 1/3             | 33.3% | Total with need                  |
|                                   |                                |                                                  |                           |                       |       |       |           |        |      |               | Need     | 3/3563          | 0.1%  | Total participants               |
|                                   |                                |                                                  |                           |                       |       |       |           |        |      |               | Unmet    | 2/3563          | 0.1%  | Total participants               |
|                                   |                                |                                                  |                           |                       |       |       |           |        |      |               | Use      | 1/3563          | 0.0%  | Total participants               |
|                                   | Danquah et Brus, 2013[25]      | WGQ Short set                                    | Mixed-methods             | Self-report           | 5+    | 3122  | 10        | RAL    | AMR  | Haiti         | Need     | 17/178          | 9.7%  | Total with functional difficulty |

|                            |                                                                |                           |                         |     |       |           |             |      |                |          |                |        |                                                   |                                  |
|----------------------------|----------------------------------------------------------------|---------------------------|-------------------------|-----|-------|-----------|-------------|------|----------------|----------|----------------|--------|---------------------------------------------------|----------------------------------|
|                            |                                                                |                           |                         |     |       |           |             |      |                |          | Use            | 12/178 | 6.9%                                              | Total with functional difficulty |
| Giesbrecht et al, 2017[41] | Canadian Survey on Disability                                  | Secondary cross-sectional | Self-report             | 15+ | 45442 | 10        | RAL         | AMR  | Canada         | Undermet | 28880/288800   | 10.0%  | Total with AP                                     |                                  |
|                            |                                                                |                           |                         |     |       |           |             |      |                | Unmet    | 662552/3775920 | 17.5%  | Total with functional difficulty                  |                                  |
| Smith et al, 2016[42]      | Canadian Survey on Disability                                  | Secondary cross-sectional | Self-report             | 15+ | 45500 | 9 [10]    | AP use      | AMR  | Canada         | Use      | 197560/288800  | 68.4%  | Total with AP                                     |                                  |
| Pryor et al, 2018[30]      | ATA-N, RAD, WGQ                                                | Cross-sectional           | Self-report             | 18+ | 4253  | 9 [4]     | AP use      | SEAR | Bangladesh     | Use      | 1/112          | 0.9%   | Total with functional difficulty and using any AP |                                  |
| Theis et al, 2019[48]      | Survey of Income and Program Participation                     | Secondary cross-sectional | Self-report             | 18+ | 66410 | 10        | AP use; RAL | AMR  | United States  | Use      | 3.6/225.6*     | 1.6%   | Total population                                  |                                  |
| Gale et al, 2015[43]       | English Longitudinal Study of Aging; Health Survey for England | Secondary cross-sectional | Functional; Self-report | 60+ | 5450  | 9 [2]     | AP use; RAL | EUR  | United Kingdom | Use      | 93/3371        | 2.8%   | Total with functional difficulty                  |                                  |
| Cornman et al, 2008[49]    | Health and Retirement Study                                    | Secondary cross-sectional | Self-report             | 65+ | 10101 | 8 [2, 10] | AP use      | AMR  | United States  | Use      | 869/10101      | 8.6%   | Total participants                                |                                  |
| Gell et al, 2015[44]       | National Health and Aging Trends Study                         | Secondary cross-sectional | Self-report             | 65+ | 7609  | 10        | AP use      | AMR  | United States  | Use      | 2.1/35*        | 6.1%   | Total population                                  |                                  |
| Iwashyna et Christie,      | Medicare Current Beneficiary                                   | Secondary cross-sectional | Self-report             | 65+ | 4687  | 10        | RAL         | AMR  | United States  | Use      | 147/835        | 17.6%  | Total with functional difficulty                  |                                  |

|                        |                                     |                           |                       |     |       |       |        |     |               |               |                 |       |                    |  |
|------------------------|-------------------------------------|---------------------------|-----------------------|-----|-------|-------|--------|-----|---------------|---------------|-----------------|-------|--------------------|--|
| 2007[45]               | Survey                              |                           |                       |     |       |       |        |     |               |               |                 |       |                    |  |
| Wolff et al, 2005[46]  | Medicare Current Beneficiary Survey | Secondary cross-sectional | Clinical; Self-report | 65+ | 12691 | 9 [7] | AP use | AMR | United States | Has AP        | 776113/30000000 | 2.6%  | Total population   |  |
| Dupraz et al, 2020[40] | 5-COOP                              | Cross-sectional           | Clinical; Self-report | 100 | 1253  | 10    | AP use | EUR | Denmark       | Use (Indoor)  | 37/251          | 14.7% | Total participants |  |
|                        |                                     |                           |                       |     |       |       |        |     |               | Use (Outdoor) | 50/251          | 19.9% | Total participants |  |
|                        |                                     |                           |                       |     |       |       |        | EUR | France        | Use (Indoor)  | 67/212          | 31.6% | Total participants |  |
|                        |                                     |                           |                       |     |       |       |        |     |               | Use (Outdoor) | 67/212          | 31.6% | Total participants |  |
|                        |                                     |                           |                       |     |       |       |        | EUR | Sweden        | Use (Indoor)  | 75/274          | 27.4% | Total participants |  |
|                        |                                     |                           |                       |     |       |       |        |     |               | Use (Outdoor) | 90/274          | 32.8% | Total participants |  |
|                        |                                     |                           |                       |     |       |       |        | EUR | Switzerland   | Use (Indoor)  | 62/170          | 36.5% | Total participants |  |
|                        |                                     |                           |                       |     |       |       |        |     |               | Use (Outdoor) | 68/170          | 40.0% | Total participants |  |
|                        |                                     |                           |                       |     |       |       |        | WPR | Japan         | Use (Indoor)  | 143/346         | 41.3% | Total participants |  |
|                        |                                     |                           |                       |     |       |       |        |     |               | Use (Outdoor) | 186/346         | 53.8% | Total participants |  |

ATA-N=Assistive Technology Assessment-Needs. RAD=Rapid Assessment of Disability. WGQ=Washington Group Questions. RAL=self-reported activity limitations.

\*Results are presented in millions.

Appendix 9: Near and Distance Glasses Indicators

| AP Type      | Citation                      | Tool, Survey, or Dataset | Study Design    | Approaches            | Ages  | Participants | JBI Score | Functional Difficulty Threshold | WHO Region | Country    | AP access Indicator |             |       |                    |
|--------------|-------------------------------|--------------------------|-----------------|-----------------------|-------|--------------|-----------|---------------------------------|------------|------------|---------------------|-------------|-------|--------------------|
|              |                               |                          |                 |                       |       |              |           |                                 |            |            | Indicator           | Calculation | (%)   | Denominator        |
| Near Glasses | Azizoglu et al, 2017[50]      | None                     | Cross-sectional | Clinical              | 3-10  | 823          | 9 [2]     | RE subsets                      | EUR        | Turkey     | Need                | 86/823      | 10.4% | Total participants |
|              |                               |                          |                 |                       |       |              |           |                                 |            |            | Use                 | 65/823      | 7.9%  | Total participants |
|              | Marmamula et al, 2013 (a)[51] | RARE                     | Cross-sectional | Clinical              | 15-49 | 3095         | 10        | AP use                          | SEAR       | India      | Use                 | 14/325      | 4.3%  | Total with AP      |
|              | Muhit et al, 2018[52]         | RARE                     | Cross-sectional | Clinical; Self-report | 15-49 | 3050         | 10        | PVA<6/18; UCNVA<N8              | SEAR       | Bangladesh | Coverage            | 28/869      | 3.2%  | Total with need    |
|              |                               |                          |                 |                       |       |              |           |                                 |            |            | Met                 | 28/869      | 3.2%  | Total with need    |
|              |                               |                          |                 |                       |       |              |           |                                 |            |            | Unmet               | 841/869     | 96.8% | Total with need    |
|              | Chan et al, 2013[53]          | RARE                     | Cross-sectional | Clinical              | 15-50 | 3171         | 9 [4]     | UCVA<6/12                       | AFR        | Eritrea    | Coverage            | 39/394      | 9.9%  | Total with need    |
|              |                               |                          |                 |                       |       |              |           |                                 |            |            | Met                 | 39/394      | 9.9%  | Total with need    |
|              |                               |                          |                 |                       |       |              |           |                                 |            |            | Unmet               | 355/394     | 90.1% | Total with need    |
|              | Loughman et al, 2015[54]      | RARE                     | Cross-sectional | Clinical; Self-report | 15-50 | 3457         | 9 [4]     | PVA<6/12                        | AFR        | Mozambique | Coverage            | 7/319       | 2.2%  | Total with need    |
|              |                               |                          |                 |                       |       |              |           |                                 |            |            | Met                 | 7/319       | 2.2%  | Total with need    |
|              |                               |                          |                 |                       |       |              |           |                                 |            |            | Unmet               | 317/319     | 99.4% | Total with need    |
|              | Marmamula et al, 2009[55]     | RARE                     | Cross-sectional | Clinical; Self-report | 15-50 | 3203         | 10        | PVA<6/12; UCNVA<N8              | SEAR       | India      | Coverage            | 130/690     | 18.8% | Total with need    |
|              |                               |                          |                 |                       |       |              |           |                                 |            |            | Met                 | 130/3203    | 4.1%  | Total participants |
|              |                               |                          |                 |                       |       |              |           |                                 |            |            | Need                | 690/3203    | 21.5% | Total participants |
|              |                               |                          |                 |                       |       |              |           |                                 |            |            | Unmet               | 560/3203    | 17.5% | Total participants |



|                        |                                       |                           |                            |       |      |    |                    |                       |             |          |              |        |                                  |               |
|------------------------|---------------------------------------|---------------------------|----------------------------|-------|------|----|--------------------|-----------------------|-------------|----------|--------------|--------|----------------------------------|---------------|
|                        |                                       |                           |                            |       |      |    |                    |                       |             |          | Use          | 15/371 | 4.0%                             | Total with AP |
| Taylor et al, 2010[56] | National Indigenous Eye Health Survey | Cross-sectional           | Clinical                   | 5-89  | 2883 | 10 | VA<6/12; NVA<N8    | WPR                   | Australia   | Use      | 827/1325     | 62.4%  | Total participants               |               |
| Ramke et al, 2012[57]  | RAAB; Timor-Leste Eye Health Survey   | Cross-sectional           | Clinical; Self-report      | 0-100 | 2014 | 10 | PVA<6/18; UCNVA<N7 | SEAR                  | Timor-Leste | Coverage | 166/1057     | 15.7%  | Total with need                  |               |
|                        |                                       |                           |                            |       |      |    |                    |                       |             | Met      | 166/2014     | 8.2%   | Total participants               |               |
|                        |                                       |                           |                            |       |      |    |                    |                       |             | Unmet    | 891/2014     | 44.2%  | Total participants               |               |
| Fricke et al, 2018[58] | None                                  | Secondary cross-sectional | Multiple secondary sources | 0+    | N/A  | 10 | UCVA<N8            | Andean Latin America  |             | Unmet    | Not provided | 51.4%  | Total with functional difficulty |               |
|                        |                                       |                           |                            |       |      |    |                    | Australia             |             | Unmet    | Not provided | 1.0%   | Total with functional difficulty |               |
|                        |                                       |                           |                            |       |      |    |                    | Caribbean             |             | Unmet    | Not provided | 43.0%  | Total with functional difficulty |               |
|                        |                                       |                           |                            |       |      |    |                    | Central Asia          |             | Unmet    | Not provided | 47.4%  | Total with functional difficulty |               |
|                        |                                       |                           |                            |       |      |    |                    | Central Europe        |             | Unmet    | Not provided | 18.4%  | Total with functional difficulty |               |
|                        |                                       |                           |                            |       |      |    |                    | Central Latin America |             | Unmet    | Not provided | 47.6%  | Total with functional difficulty |               |
|                        |                                       |                           |                            |       |      |    |                    | Central Sub-Saharan   |             | Unmet    | Not provided | 12.0%  | Total with functional difficulty |               |

|  |                              |       |              |       |                                  |  |
|--|------------------------------|-------|--------------|-------|----------------------------------|--|
|  | Africa                       |       |              |       |                                  |  |
|  | East Asia                    | Unmet | Not provided | 14.5% | Total with functional difficulty |  |
|  | East Sub-Saharan Africa      | Unmet | Not provided | 11.9% | Total with functional difficulty |  |
|  | Eastern Europe               | Unmet | Not provided | 30.0% | Total with functional difficulty |  |
|  | Global                       | Unmet | Not provided | 45.2% | Total with functional difficulty |  |
|  | HI Asia Pacific              | Unmet | Not provided | 1.0%  | Total with functional difficulty |  |
|  | HI North America             | Unmet | Not provided | 1.0%  | Total with functional difficulty |  |
|  | North Africa and Middle East | Unmet | Not provided | 45.6% | Total with functional difficulty |  |
|  | Oceania                      | Unmet | Not provided | 74.2% | Total with functional difficulty |  |
|  | South Asia                   | Unmet | Not provided | 71.7% | Total with functional difficulty |  |
|  | Southeast Asia               | Unmet | Not provided | 58.2% | Total with functional difficulty |  |
|  | Southern Latin               | Unmet | Not provided | 24.9% | Total with functional            |  |

|                             |                    |                 |                       |       |      |       |            |     |                             |           |           |              |                                  |                                  |
|-----------------------------|--------------------|-----------------|-----------------------|-------|------|-------|------------|-----|-----------------------------|-----------|-----------|--------------|----------------------------------|----------------------------------|
|                             |                    |                 |                       |       |      |       |            |     | America                     |           |           |              |                                  | difficulty                       |
|                             |                    |                 |                       |       |      |       |            |     | Southern Sub-Saharan Africa |           | Unmet     | Not provided | 74.3%                            | Total with functional difficulty |
|                             |                    |                 |                       |       |      |       |            |     | Tropical Latin America      |           | Unmet     | Not provided | 40.9%                            | Total with functional difficulty |
|                             |                    |                 |                       |       |      |       |            |     | West Sub-Saharan Africa     |           | Unmet     | Not provided | 8.6%                             | Total with functional difficulty |
|                             |                    |                 |                       |       |      |       |            |     | Western Europe              |           | Unmet     | Not provided | 1.0%                             | Total with functional difficulty |
| Casas Luque et al, 2019[59] | RARE               | Cross-sectional | Clinical; Self-report | 15-99 | 2886 | 9 [4] | VA<6/12    | AMR | Colombia                    | Coverage  | 468/1379  | 33.9%        | Total with need                  |                                  |
|                             |                    |                 |                       |       |      |       |            |     |                             | Met       | 468/1379  | 33.9%        | Total with need                  |                                  |
|                             |                    |                 |                       |       |      |       |            |     |                             | Unmet     | 911/1379  | 66.1%        | Total with need                  |                                  |
| Robinson et al, 2013[60]    | None               | Cross-sectional | Clinical; Self-report | 39-94 | 1345 | 10    | PVA<6/12   | AMR | Canada                      | Use       | 635/768   | 82.7%        | Total participants               |                                  |
| Umar et al, 2015[61]        | None               | Cross-sectional | Clinical              | 40-97 | 650  | 10    | PVA<6/18   | AFR | Nigeria                     | Coverage  | 5/635     | 0.8%         | Total participants               |                                  |
|                             |                    |                 |                       |       |      |       |            |     |                             | Met       | 1/635     | 0.2%         | Total participants               |                                  |
|                             |                    |                 |                       |       |      |       |            |     |                             | Under-met | 5/635     | 0.8%         | Total participants               |                                  |
|                             |                    |                 |                       |       |      |       |            |     |                             | Unmet     | 192/635   | 30.2%        | Total participants               |                                  |
| Abdullah et al, 2015[62]    | None               | Cross-sectional | Clinical; Self-report | 30+   | 917  | 9 [2] | VA<6/6     | EMR | Pakistan                    | Use       | 90/528    | 17.0%        | Total with functional difficulty |                                  |
| Laitinen et al, 2005[63]    | Health 2000 Survey | Cross-sectional | Clinical; Self-report | 30+   | 7413 | 10    | PNVA<=6/24 | EUR | Finland                     | Has AP    | 4586/6667 | 68.8%        | Total participants               |                                  |

|                    |      |                 |          |     |       |       |                     |      |                   |       |           |       |                                  |
|--------------------|------|-----------------|----------|-----|-------|-------|---------------------|------|-------------------|-------|-----------|-------|----------------------------------|
| He et al, 2012[64] | None | Cross-sectional | Clinical | 35+ | 17734 | 9 [4] | UCNVA<=6/12         | AFR  | Niger             | Met   | 60/673    | 8.9%  | Total with need                  |
|                    |      |                 |          |     |       |       |                     | AFR  | Niger             | Unmet | 613/673   | 91.1% | Total with need                  |
|                    |      |                 |          |     |       |       | UCNVA<=6/12; AP Use | AFR  | Niger             | Use   | 79/869    | 9.1%  | Total with functional difficulty |
|                    |      |                 |          |     |       |       | UCNVA<=6/12         | AFR  | South Africa      | Met   | 27/1521   | 1.8%  | Total with need                  |
|                    |      |                 |          |     |       |       |                     | AFR  | South Africa      | Unmet | 1494/1521 | 98.2% | Total with need                  |
|                    |      |                 |          |     |       |       | UCNVA<=6/12; AP Use | AFR  | South Africa      | Use   | 15/1687   | 0.9%  | Total with functional difficulty |
|                    |      |                 |          |     |       |       | UCNVA<=6/12         | AMR  | United States     | Met   | 315/450   | 70.0% | Total with need                  |
|                    |      |                 |          |     |       |       |                     | AMR  | United States     | Unmet | 135/450   | 30.0% | Total with need                  |
|                    |      |                 |          |     |       |       | UCNVA<=6/12; AP Use | AMR  | United States     | Use   | 147/476   | 30.9% | Total with functional difficulty |
|                    |      |                 |          |     |       |       | UCNVA<=6/12         | SEAR | India             | Met   | 92/1568   | 5.9%  | Total with need                  |
|                    |      |                 |          |     |       |       |                     | SEAR | India             | Unmet | 1476/1568 | 94.1% | Total with need                  |
|                    |      |                 |          |     |       |       | UCNVA<=6/12; AP Use | SEAR | India             | Use   | 31/2169   | 1.4%  | Total with functional difficulty |
|                    |      |                 |          |     |       |       | UCNVA<=6/12         | SEAR | Nepal             | Met   | 56/1277   | 4.4%  | Total with need                  |
|                    |      |                 |          |     |       |       |                     | SEAR | Nepal             | Unmet | 1221/1277 | 95.6% | Total with need                  |
|                    |      |                 |          |     |       |       | UCNVA<=6/12; AP Use | SEAR | Nepal             | Use   | 34/1448   | 2.3%  | Total with functional difficulty |
|                    |      |                 |          |     |       |       | UCNVA<=6/12         | WPR  | China (Guangzhou) | Met   | 643/948   | 67.8% | Total with need                  |
|                    |      |                 |          |     |       |       |                     | WPR  | China (Guangzhou) | Unmet | 305/948   | 32.2% | Total with need                  |

|                               |      |                     |                                  |             |       |          |                   |                       |              |                                        |       |           |       |                                        |
|-------------------------------|------|---------------------|----------------------------------|-------------|-------|----------|-------------------|-----------------------|--------------|----------------------------------------|-------|-----------|-------|----------------------------------------|
|                               |      |                     |                                  |             |       |          |                   | UCNVA≤6/12;<br>AP Use | WPR          | China<br>(Guangzhou)                   | Use   | 657/1101  | 59.7% | Total with<br>functional<br>difficulty |
|                               |      |                     |                                  |             |       |          |                   | UCNVA≤6/12            | WPR          | China<br>(Shunyi)                      | Met   | 3/1718    | 0.2%  | Total with<br>need                     |
|                               |      |                     |                                  |             |       |          |                   |                       | WPR          | China<br>(Shunyi)                      | Unmet | 1715/1718 | 99.8% | Total with<br>need                     |
|                               |      |                     |                                  |             |       |          |                   | UCNVA≤6/12;<br>AP Use | WPR          | China<br>(Shunyi)                      | Use   | 2/2435    | 0.1%  | Total with<br>functional<br>difficulty |
| He et al, 2014<br>(a)[65]     | None | Cohort              | Clinical;<br>Self-report         | 35+         | 10553 | 9 [4]    | UCVA≤6/12         | SEAR                  | India        | Met                                    |       | 175/937   | 18.7% | Total with<br>functional<br>difficulty |
|                               |      |                     |                                  |             |       |          |                   |                       |              | Nepal                                  | Met   | 122/942   | 13.0% | Total with<br>functional<br>difficulty |
|                               |      |                     |                                  |             |       |          |                   |                       | WPR          | China<br>(Guangzhou)                   | Met   | 321/459   | 69.9% | Total with<br>functional<br>difficulty |
|                               |      |                     |                                  |             |       |          |                   |                       |              | China<br>(Shunyi)                      | Met   | 4/607     | 0.7%  | Total with<br>functional<br>difficulty |
| Hookway<br>et al,<br>2016[66] | None | Cross-<br>sectional | Clinic<br>al;<br>Self-<br>report | 3<br>5<br>+ | 3390  | 8 [4, 9] | UCVA<<br>=6/12    | AMR                   | Nicaragua    | Uncorrec<br>ted<br>refractive<br>error |       | 1676/1871 | 89.6% | Total<br>participants                  |
| Naidoo et al,<br>2013[67]     | None | Cross-<br>sectional | Clinical;<br>Self-report         | 35+         | 1939  | 9 [4]    | VA<6/12           | AFR                   | South Africa | Coverage                               |       | 72/1488   | 4.8%  | Total with<br>need                     |
|                               |      |                     |                                  |             |       |          |                   |                       |              | Met                                    |       | 72/1939   | 3.7%  | Total<br>participants                  |
|                               |      |                     |                                  |             |       |          |                   |                       |              | Unmet                                  |       | 1416/1939 | 73.0% | Total<br>participants                  |
| Ntodie et al,<br>2017[68]     | None | Cross-<br>sectional | Clinical;<br>Self-report         | 35+         | 576   | 10       | VA≤6/18;<br>NV≤N8 | AFR                   | Ghana        | Coverage                               |       | 125/500   | 25.0% | Total<br>participants                  |
|                               |      |                     |                                  |             |       |          |                   |                       |              | Has AP                                 |       | 125/376   | 33.2% | Total with<br>functional<br>difficulty |
|                               |      |                     |                                  |             |       |          |                   |                       |              | Met                                    |       | 56/500    | 11.2% | Total<br>participants                  |

|                           |      |                 |                       |     |      |             |                   |      |               |                              |          |           |                                  |       |                                  |
|---------------------------|------|-----------------|-----------------------|-----|------|-------------|-------------------|------|---------------|------------------------------|----------|-----------|----------------------------------|-------|----------------------------------|
|                           |      |                 |                       |     |      |             |                   |      |               |                              |          | Under-met | 69/500                           | 13.8% | Total participants               |
|                           |      |                 |                       |     |      |             |                   |      |               |                              |          | Unmet     | 251/500                          | 50.2% | Total participants               |
| Sapkota et al, 2012[69]   | None | Cross-sectional | Clinical              | 35+ | 2156 | 9 [4]       | UCNVA<=6/12       | SEAR | Nepal         | Met                          | 56/1448  | 3.9%      | Total with functional difficulty |       |                                  |
|                           |      |                 |                       |     |      |             |                   |      |               |                              |          | Unmet     | 1221/1448                        | 84.3% | Total with functional difficulty |
| Uche et al, 2014[70]      | None | Cross-sectional | Clinical; Self-report | 35+ | 720  | 10          | NVA<N8            | AFR  | Nigeria       | Coverage                     | 103/371  | 27.8%     | Total need                       |       |                                  |
|                           |      |                 |                       |     |      |             |                   |      |               |                              |          | Met       | 103/585                          | 17.6% | Total participants               |
|                           |      |                 |                       |     |      |             |                   |      |               |                              |          | Unmet     | 268/585                          | 45.8% | Total participants               |
| Cheng et al, 2016[71]     | None | Cross-sectional | Clinical              | 40+ | 5197 | 10          | PVA<6/12          | WPR  | China         | Coverage                     | 211/4144 | 5.1%      | Total with functional difficulty |       |                                  |
| Gupta et al, 2015[72]     | RAVI | Cross-sectional | Clinical; Self-report | 40+ | 2331 | 10          | PVA<6/18; PNVA<N8 | SEAR | India         | Use                          | 397/798  | 49.7%     | Total with functional difficulty |       |                                  |
| Laviers et al, 2010[73]   | RAAB | Cross-sectional | Clinical; Self-report | 40+ | 381  | 9 [4]       | VA<6/18           | AFR  | Tanzania      | Coverage                     | 60/340   | 17.6%     | Total with need                  |       |                                  |
|                           |      |                 |                       |     |      |             |                   |      |               |                              |          | Met       | 60/340                           | 17.6% | Total with need                  |
|                           |      |                 |                       |     |      |             |                   |      |               |                              |          | Unmet     | 280/340                          | 82.4% | Total with need                  |
| Lu et al, 2011[74]        | None | Cross-sectional | Clinical; Self-report | 40+ | 1008 | 10          | PVA<6/12          | WPR  | China         | Coverage                     | 343/666  | 51.5%     | Total with need                  |       |                                  |
|                           |      |                 |                       |     |      |             |                   |      |               |                              |          | Met       | 343/666                          | 51.5% | Total with need                  |
|                           |      |                 |                       |     |      |             |                   |      |               |                              |          | Unmet     | 323/666                          | 48.5% | Total with need                  |
| Mansberger, 2005[75]      | None | Cross-sectional | Clinical              | 40+ | 288  | 7 [2, 4, 9] | PNVA<= Jaeger 4   | AMR  | United States | Uncorrected refractive error | 88/288   | 30.6%     | Total participants               |       |                                  |
| Marmamula et al, 2012[76] | RAVI | Cross-sectional | Clinical; Self-report | 40+ | 1700 | 9 [4]       | PVA<6/18; PNVA<N8 | SEAR | India         | Coverage                     | 55/494   | 11.1%     | Total with need                  |       |                                  |

|                               |                                  |                 |                       |     |      |          |                    |      |             |          |           |           |                    |                                  |
|-------------------------------|----------------------------------|-----------------|-----------------------|-----|------|----------|--------------------|------|-------------|----------|-----------|-----------|--------------------|----------------------------------|
|                               |                                  |                 |                       |     |      |          |                    |      |             |          | Met       | 55/1094   | 5.0%               | Total with functional difficulty |
|                               |                                  |                 |                       |     |      |          |                    |      |             |          | Unmet     | 439/1094  | 40.1%              | Total with functional difficulty |
| Marmamula et al, 2013 (b)[77] | None                             | Cross-sectional | Clinical; Self-report | 40+ | 2848 | 9 [4]    | PVA<6/18; UCNVA<N8 | SEAR | India       | Coverage | 654/1513  | 43.2%     | Total with need    |                                  |
|                               |                                  |                 |                       |     |      |          |                    |      |             |          | Met       | 654/2448  | 26.7%              | Total participants               |
|                               |                                  |                 |                       |     |      |          |                    |      |             |          | Under-met | 78/859    | 9.1%               | Total with functional difficulty |
|                               |                                  |                 |                       |     |      |          |                    |      |             |          | Unmet     | 859/2448  | 35.1%              | Total participants               |
| Marmamula et al, 2014[78]     | None                             | Cross-sectional | Clinical; Self-report | 40+ | 7378 | 9 [4]    | VA<6/12; UCNVA<N8  | SEAR | India       | Coverage | 939/3483  | 27.0%     | Total with need    |                                  |
|                               |                                  |                 |                       |     |      |          |                    |      |             |          | Met       | 939/7378  | 12.7%              | Total participants               |
|                               |                                  |                 |                       |     |      |          |                    |      |             |          | Unmet     | 2544/7378 | 34.5%              | Total participants               |
| Marmamula et al, 2017 (a)[79] | RAVI                             | Cross-sectional | Clinical              | 40+ | 5881 | 10       | PNVA<6/12          | SEAR | India       | Coverage | 988/3734  | 26.5%     | Total with need    |                                  |
|                               |                                  |                 |                       |     |      |          |                    |      |             |          | Met       | 988/5140  | 19.2%              | Total participants               |
|                               |                                  |                 |                       |     |      |          |                    |      |             |          | Need      | 2996/5140 | 58.3%              | Total participants               |
|                               |                                  |                 |                       |     |      |          |                    |      |             |          | Unmet     | 2746/5140 | 53.4%              | Total participants               |
| Ranke et al, 2007[80]         | RACSS                            | Cross-sectional | Clinical; Self-report | 40+ | 1414 | 10       | VA<N8              | SEAR | Timor-Leste | Met      | 162/1414  | 11.5%     | Total participants |                                  |
|                               |                                  |                 |                       |     |      |          |                    |      |             |          | Unmet     | 457/1414  | 32.3%              | Total participants               |
| Cunha et al, 2018[81]         | None                             | Cross-sectional | Clinical              | 45+ | 2041 | 9 [1]    | UCNVA<=6/18        | AMR  | Brazil      | Use      | 229/2025  | 11.3%     | Total participants |                                  |
| Sherwin et al, 2008[82]       | Nakuru District Blindness Study; | Cross-sectional | Clinical; Self-report | 50+ | 134  | 8 [4, 8] | NVA<N8             | AFR  | Kenya       | Coverage | 7/111     | 6.3%      | Total with need    |                                  |



|                  |                               |                                                    |                           |                       |       |       |       |                    |      |               |                              |                              |            |       |                                  |
|------------------|-------------------------------|----------------------------------------------------|---------------------------|-----------------------|-------|-------|-------|--------------------|------|---------------|------------------------------|------------------------------|------------|-------|----------------------------------|
|                  |                               | Rift<br>Blindness<br>Study                         |                           |                       |       |       |       |                    |      |               |                              | Met                          | 7/130      | 5.4%  | Total<br>participants            |
|                  |                               |                                                    |                           |                       |       |       |       |                    |      |               |                              | Under-met                    | 2/130      | 1.5%  | Total<br>participants            |
|                  |                               |                                                    |                           |                       |       |       |       |                    |      |               |                              | Unmet                        | 102/130    | 78.5% | Total<br>participants            |
|                  |                               |                                                    |                           |                       |       |       |       |                    |      |               |                              | Use                          | 9/130      | 6.9%  | Total<br>participants            |
|                  | Zebardast et al, 2017[83]     | National Health and Nutritional Examination Survey | Cross-sectional           | Clinical; Self-report | 50+   | 11016 | 9 [8] | PNVA<6/12; RAL     | AMR  | United States |                              | Unmet                        | 1476/11009 | 13.4% | Total with functional difficulty |
|                  |                               |                                                    |                           |                       |       |       |       |                    |      |               |                              | Use                          | 9533/11009 | 86.6% | Total with functional difficulty |
|                  | Otte et al, 2018[84]          | National Health and Aging Trends Study             | Secondary cross-sectional | Self-report           | 65+   | 7497  | 10    | RAL; AP use        | AMR  | United States |                              | Under-met                    | 1.2/37.2*  | 3.2%  | Total with AP                    |
| Distance glasses | Kodjebacheva et al, 2011[85]  | UCLA Mobile Eye Clinic Study                       | Cross-sectional           | Clinical              | 5-7   | 11332 | 10    | PDVA<6/12          | AMR  | United States | Uncorrected refractive error |                              | 858/11332  | 7.6%  | Total participants               |
|                  | Naidoo et al, 2016[86]        | RARE                                               | Cross-sectional           | Self-report           | 15-36 | 1516  | 10    | AP use             | AFR  | South Africa  |                              | Use                          | 32/58      | 55.2% | Total with AP                    |
|                  | Marmamula et al, 2013 (b)[77] | RARE                                               | Cross-sectional           | Clinical              | 15-49 | 3095  | 9 [4] | PVA<=6/12          | SEAR | India         |                              | Use                          | 130/325    | 40.0% | Total with AP                    |
|                  | Loughman et al, 2015[54]      | RARE                                               | Cross-sectional           | Clinical; Self-report | 15-50 | 3457  | 9 [4] | DVA<6/12; NVA<6/12 | AFR  | Mozambique    |                              | Coverage                     | 0/90       | 0.0%  | Total with functional difficulty |
|                  |                               |                                                    |                           |                       |       |       |       |                    |      |               |                              | Uncorrected refractive error | 90/3452    | 2.6%  | Total participants               |

|                           |                                                |                           |                       |       |      |          |                     |      |             |                              |          |       |                                  |
|---------------------------|------------------------------------------------|---------------------------|-----------------------|-------|------|----------|---------------------|------|-------------|------------------------------|----------|-------|----------------------------------|
| Marmamula et al, 2009[55] | RARE                                           | Cross-sectional           | Clinical; Self-report | 15-50 | 3203 | 10       | UCVA<6/12; UCNVA<N8 | SEAR | India       | Coverage                     | 58/200   | 29.0% | Total with need                  |
|                           |                                                |                           |                       |       |      |          |                     |      |             | Met                          | 58/3203  | 1.8%  | Total participants               |
|                           |                                                |                           |                       |       |      |          |                     |      |             | Need                         | 200/3203 | 6.2%  | Total participants               |
|                           |                                                |                           |                       |       |      |          |                     |      |             | Uncorrected refractive error | 96/109   | 88.1% | Total with functional difficulty |
|                           |                                                |                           |                       |       |      |          |                     |      |             | Unmet                        | 142/3203 | 4.4%  | Total participants               |
|                           |                                                |                           |                       |       |      |          |                     |      |             | Use                          | 142/371  | 38.3% | Total with AP                    |
| Taylor et al, 2010[56]    | National Indigenous Eye Health Survey          | Cross-sectional           | Clinical              | 5-89  | 2883 | 10       | PVA<6/12            | WPR  | Australia   | Use                          | 513/3019 | 17.0% | Total participants               |
| Ramke et al, 2012[57]     | RAAB; Timor-Leste Eye Health Survey            | Cross-sectional           | Clinical; Self-report | 0-100 | 2014 | 10       | PVA<6/18            | SEAR | Timor-Leste | Coverage                     | 71/291   | 24.4% | Total need                       |
|                           |                                                |                           |                       |       |      |          |                     |      |             | Met                          | 71/2014  | 3.5%  | Total participants               |
|                           |                                                |                           |                       |       |      |          |                     |      |             | Unmet                        | 220/2014 | 10.9% | Total participants               |
| Boggs et al, 2019[22]     | WGQ Child Functioning Module; WGQ Extended set | Secondary cross-sectional | Clinical; Self-report | 0+    | 7135 | 8 [4, 8] | VA<6/18; RAL        | AFR  | Cameroon    | Coverage                     | 10/27    | 37.0% | Total with need                  |
|                           |                                                |                           |                       |       |      |          |                     |      |             | Need                         | 27/3572  | 0.8%  | Total participants               |
|                           |                                                |                           |                       |       |      |          |                     |      |             | Uncorrected refractive error | 17/3572  | 0.5%  | Total participants               |

|                             |                                      |                 |                       |       |      |          |               |      |           |  |                              |          |       |                                  |
|-----------------------------|--------------------------------------|-----------------|-----------------------|-------|------|----------|---------------|------|-----------|--|------------------------------|----------|-------|----------------------------------|
|                             |                                      |                 |                       |       |      |          |               |      |           |  | Unmet                        | 17/27    | 63.0% | Total with need                  |
|                             |                                      |                 |                       |       |      |          |               |      |           |  | Use                          | 10/3572  | 0.3%  | Total participants               |
|                             |                                      |                 |                       |       |      |          |               | SEAR | India     |  | Coverage                     | 114/131  | 87.0% | Total with need                  |
|                             |                                      |                 |                       |       |      |          |               |      |           |  | Need                         | 131/3563 | 3.7%  | Total participants               |
|                             |                                      |                 |                       |       |      |          |               |      |           |  | Uncorrected refractive error | 17/3563  | 0.5%  | Total participants               |
|                             |                                      |                 |                       |       |      |          |               |      |           |  | Unmet                        | 17/131   | 13.0% | Total with need                  |
|                             |                                      |                 |                       |       |      |          |               |      |           |  | Use                          | 114/3563 | 3.2%  | Total participants               |
| Casas Luque et al, 2019[59] | RARE                                 | Cross-sectional | Clinical; Self-report | 15-99 | 2886 | 9 [4]    | UCVA<6/12     | AMR  | Colombia  |  | Coverage                     | 288/566  | 50.9% | Total with need                  |
|                             |                                      |                 |                       |       |      |          |               |      |           |  | Met                          | 288/566  | 50.9% | Total with need                  |
|                             |                                      |                 |                       |       |      |          |               |      |           |  | Uncorrected refractive error | 360/2877 | 12.5% | Total participants               |
|                             |                                      |                 |                       |       |      |          |               |      |           |  | Unmet                        | 278/566  | 49.1% | Total with need                  |
| Goujon et al, 2010[87]      | National Indigenous Eye Health Study | Cross-sectional | Clinical; Self-report | 5+    | 2883 | 8 [3, 9] | PVA<6/12; RAL | WPR  | Australia |  | Coverage                     | 389/467  | 83.3% | Total with need                  |
|                             |                                      |                 |                       |       |      |          |               |      |           |  | Met                          | 389/488  | 79.7% | Total with functional difficulty |
|                             |                                      |                 |                       |       |      |          |               |      |           |  | Under-met                    | 32/488   | 6.6%  | Total with functional difficulty |
|                             |                                      |                 |                       |       |      |          |               |      |           |  | Unmet                        | 46/488   | 9.4%  | Total with functional difficulty |
|                             |                                      |                 |                       |       |      |          |               |      |           |  | Use                          | 243/440  | 55.2% | Total with                       |

|                             |                                                 |                           |                       |       |       |        |           |      |               |                              |            |       |                                  |                       |
|-----------------------------|-------------------------------------------------|---------------------------|-----------------------|-------|-------|--------|-----------|------|---------------|------------------------------|------------|-------|----------------------------------|-----------------------|
| Vitale et al, 2006 (a)[88]  | National Health and Aging Trends Study          | Secondary cross-sectional | Clinical; Self-report | 12+   | 15193 | 10     | PVA<=6/12 | AMR  | United States | Use                          | 4054/13075 | 31.0% | Total participants               | functional difficulty |
| Malhotra et al, 2019[89]    | None                                            | Cross-sectional           | Clinical; Self-report | 14+   | 6910  | 9 [10] | PVA<6/12  | SEAR | India         | Coverage                     | 374/1122   | 33.3% | Total with need                  |                       |
|                             |                                                 |                           |                       |       |       |        |           |      |               | Met                          | 374/1122   | 33.3% | Total with need                  |                       |
|                             |                                                 |                           |                       |       |       |        |           |      |               | Need                         | 1122/6910  | 16.2% | Total participants               |                       |
|                             |                                                 |                           |                       |       |       |        |           |      |               | Unmet                        | 748/6910   | 10.8% | Total participants               |                       |
|                             |                                                 |                           |                       |       |       |        |           |      |               | Use                          | 520/6910   | 7.5%  | Total participants               |                       |
| Robinson et al, 2013[60]    | None                                            | Cross-sectional           | Clinical; Self-report | 39-94 | 1345  | 10     | PVA<6/12  | AMR  | Canada        | Use                          | 523/768    | 68.1% | Total participants               |                       |
| Foreman et al, 2017 (a)[90] | National Eye Health Survey                      | Cross-sectional           | Clinical              | 40-98 | 4836  | 9 [9]  | PDVA<6/12 | WPR  | Australia     | Uncorrected refractive error | 243/396    | 61.4% | Total with functional difficulty |                       |
| Laitinen et al, 2005[63]    | Health 2000 Survey                              | Cross-sectional           | Clinical; Self-report | 30+   | 7413  | 10     | PVA<=6/24 | EUR  | Finland       | Has AP                       | 3497/6771  | 51.6% | Total participants               |                       |
|                             |                                                 |                           |                       |       |       |        |           |      |               | Use                          | 3419/3497  | 97.8% | Total with AP                    |                       |
| Shah et al, 2008[91]        | National Blindness and Visual difficulty Survey | Cross-sectional           | Clinical              | 30+   | 16507 | 10     | PVA<6/12  | EMR  | Pakistan      | Coverage                     | 293/1936   | 15.1% | Total with need                  |                       |
|                             |                                                 |                           |                       |       |       |        |           |      |               | Met                          | 293/13981  | 2.1%  | Total participants               |                       |
|                             |                                                 |                           |                       |       |       |        |           |      |               | Need                         | 1936/13981 | 13.8% | Total participants               |                       |
|                             |                                                 |                           |                       |       |       |        |           |      |               | Under-met                    | 296/1148   | 25.8% | Total with AP                    |                       |

|                             |                                                                   |                 |                       |        |       |       |                     |      |                     |                              |           |            |                                  |                    |
|-----------------------------|-------------------------------------------------------------------|-----------------|-----------------------|--------|-------|-------|---------------------|------|---------------------|------------------------------|-----------|------------|----------------------------------|--------------------|
|                             |                                                                   |                 |                       |        |       |       |                     |      |                     |                              | Unmet     | 1347/13981 | 9.6%                             | Total participants |
|                             |                                                                   |                 |                       |        |       |       |                     |      |                     |                              | Use       | 1148/16484 | 7.0%                             | Total participants |
| Ramsewak et al, 2016[92]    | National Blindness and Low Vision Prevalence Survey of Bangladesh | Cross-sectional | Clinical; Self-report | 40-103 | 2515  | 10    | RE subsets          | AMR  | Trinidad and Tobago | Uncorrected refractive error | 1107/2515 | 44.0%      | Total participants               |                    |
|                             |                                                                   |                 |                       |        |       |       |                     |      |                     |                              | Use       | 1349/3597  | 37.5%                            | Total participants |
| He et al, 2012[64]          | None                                                              | Cross-sectional | Clinical              | 35+    | 17734 | 9 [4] | UCNVA<=6/12; AP use | AFR  | Niger               | Use                          | 11/869    | 1.3%       | Total with functional difficulty |                    |
|                             |                                                                   |                 |                       |        |       |       |                     |      | South Africa        | Use                          | 66/1687   | 3.9%       | Total with functional difficulty |                    |
|                             |                                                                   |                 |                       |        |       |       |                     | AMR  | United States       | Use                          | 4/476     | 0.8%       | Total with functional difficulty |                    |
|                             |                                                                   |                 |                       |        |       |       |                     | SEAR | India               | Use                          | 8/2169    | 0.4%       | Total with functional difficulty |                    |
|                             |                                                                   |                 |                       |        |       |       |                     |      | Nepal               | Use                          | 48/1448   | 3.3%       | Total with functional difficulty |                    |
|                             |                                                                   |                 |                       |        |       |       |                     | WPR  | China (Guangzhou)   | Use                          | 53/1101   | 4.8%       | Total with functional difficulty |                    |
|                             |                                                                   |                 |                       |        |       |       |                     |      | China (Shunyi)      | Use                          | 23/2435   | 0.9%       | Total with functional difficulty |                    |
| Foreman et al, 2017 (b)[93] | National Eye Health Survey                                        | Cross-sectional | Clinical; Self-report | 40+    | 4836  | 10    | PVA<6/12            | WPR  | Australia           | Met                          | 2330/2570 | 90.7%      | Total with need                  |                    |

|                               |                                                              |                 |                       |     |      |           |                  |      |               |                              |                                  |           |                    |                       |
|-------------------------------|--------------------------------------------------------------|-----------------|-----------------------|-----|------|-----------|------------------|------|---------------|------------------------------|----------------------------------|-----------|--------------------|-----------------------|
|                               |                                                              |                 |                       |     |      |           |                  |      |               |                              | Need                             | 2570/4836 | 53.1%              | Total participants    |
|                               |                                                              |                 |                       |     |      |           |                  |      |               |                              | Uncorrected refractive error     | 240/4836  | 5.0%               | Total participants    |
|                               |                                                              |                 |                       |     |      |           |                  |      |               |                              | Under-corrected refractive error | 175/240   | 72.9%              | Total with unmet need |
|                               |                                                              |                 |                       |     |      |           |                  |      |               |                              | Unmet                            | 240/2570  | 9.3%               | Total with need       |
|                               |                                                              |                 |                       |     |      |           |                  |      |               |                              | Use                              | 2505/4836 | 51.8%              | Total participants    |
| Gilbert et al, 2018[94]       | Sri Lanka National Survey of Blindness and Visual difficulty | Cross-sectional | Clinical; Self-report | 40+ | 6713 | 8 [4, 10] | PVA<6/12         | SEAR | Sri Lanka     | Coverage                     | 254/1435                         | 17.7%     | Total with need    |                       |
|                               |                                                              |                 |                       |     |      |           |                  |      |               |                              | Met                              | 254/1435  | 17.7%              | Total with need       |
|                               |                                                              |                 |                       |     |      |           |                  |      |               |                              | Need                             | 1435/5179 | 27.7%              | Total participants    |
|                               |                                                              |                 |                       |     |      |           |                  |      |               |                              | Unmet                            | 1181/1435 | 82.3%              | Total with need       |
| Mansberger, 2005[75]          | None                                                         | Cross-sectional | Clinical              | 40+ | 288  | 7 [2, 9]  | PVA<=6/12        | AMR  | United States | Uncorrected refractive error | 52/288                           | 18.1%     | Total participants |                       |
| Marmamula et al, 2014[78]     | None                                                         | Cross-sectional | Clinical; Self-report | 40+ | 7378 | 9 [4]     | VA<6/12; PNVA<N8 | SEAR | India         | Coverage                     | 361/951                          | 38.0%     | Total with need    |                       |
|                               |                                                              |                 |                       |     |      |           |                  |      |               |                              | Met                              | 361/951   | 38.0%              | Total with need       |
|                               |                                                              |                 |                       |     |      |           |                  |      |               |                              | Unmet                            | 590/951   | 62.0%              | Total with need       |
| Marmamula et al, 2016 (a)[95] | RAVI                                                         | Cross-sectional | Clinical              | 40+ | 6150 | 10        | PVA<6/18; AP use | SEAR | India         | Use                          | 1694/5881                        | 28.8%     | Total participants |                       |
| Cunha et al, 2018[81]         | None                                                         | Cross-sectional | Clinical              | 45+ | 2041 | 9 [1]     | UCNVA<=6/18      | AMR  | Brazil        | Use                          | 23/2025                          | 1.1%      | Total participants |                       |

|                         |      |                           |                            |     |         |    |          |                            |                              |              |       |                  |
|-------------------------|------|---------------------------|----------------------------|-----|---------|----|----------|----------------------------|------------------------------|--------------|-------|------------------|
| Flaxman et al, 2017[96] | None | Secondary cross-sectional | Multiple secondary sources | 50+ | 3983541 | 10 | PVA<6/18 | Andean Latin America       | Uncorrected refractive error | Not provided | 46.1% | Total population |
|                         |      |                           |                            |     |         |    |          | Australasia                | Uncorrected refractive error | Not provided | 49.3% | Total population |
|                         |      |                           |                            |     |         |    |          | Caribbean                  | Uncorrected refractive error | Not provided | 47.9% | Total population |
|                         |      |                           |                            |     |         |    |          | Central Asia               | Uncorrected refractive error | Not provided | 48.3% | Total population |
|                         |      |                           |                            |     |         |    |          | Central Europe             | Uncorrected refractive error | Not provided | 49.4% | Total population |
|                         |      |                           |                            |     |         |    |          | Central Latin America      | Uncorrected refractive error | Not provided | 47.9% | Total population |
|                         |      |                           |                            |     |         |    |          | Central Sub-Saharan Africa | Uncorrected refractive error | Not provided | 46.5% | Total population |
|                         |      |                           |                            |     |         |    |          | East Asia                  | Uncorrected refractive error | Not provided | 47.1% | Total population |
|                         |      |                           |                            |     |         |    |          | East Sub-Saharan Africa    | Uncorrected refractive error | Not provided | 46.8% | Total population |
|                         |      |                           |                            |     |         |    |          | Eastern Europe             | Uncorrected refractive error | Not provided | 48.5% | Total population |
|                         |      |                           |                            |     |         |    |          | Global                     | Uncorrected refractive error | Not provided | 53.8% | Total population |
|                         |      |                           |                            |     |         |    |          | HI Asia Pacific            | Uncorrected refractive error | Not provided | 49.4% | Total population |



|                          |      |                 |          |     |      |    |          |      |       |                        |                              |                              |                       |       |                  |
|--------------------------|------|-----------------|----------|-----|------|----|----------|------|-------|------------------------|------------------------------|------------------------------|-----------------------|-------|------------------|
|                          |      |                 |          |     |      |    |          |      |       |                        | HI North America             | Uncorrected refractive error | Not provided          | 49.5% | Total population |
|                          |      |                 |          |     |      |    |          |      |       |                        | North Africa and Middle East | Uncorrected refractive error | Not provided          | 44.6% | Total population |
|                          |      |                 |          |     |      |    |          |      |       |                        | Oceania                      | Uncorrected refractive error | Not provided          | 47.8% | Total population |
|                          |      |                 |          |     |      |    |          |      |       |                        | South Asia                   | Uncorrected refractive error | Not provided          | 66.4% | Total population |
|                          |      |                 |          |     |      |    |          |      |       |                        | Southeast Asia               | Uncorrected refractive error | Not provided          | 46.1% | Total population |
|                          |      |                 |          |     |      |    |          |      |       |                        | Southern Latin America       | Uncorrected refractive error | Not provided          | 48.2% | Total population |
|                          |      |                 |          |     |      |    |          |      |       |                        | Southern Sub-Saharan Africa  | Uncorrected refractive error | Not provided          | 48.1% | Total population |
|                          |      |                 |          |     |      |    |          |      |       |                        | Tropical Latin America       | Uncorrected refractive error | Not provided          | 49.3% | Total population |
|                          |      |                 |          |     |      |    |          |      |       |                        | West Sub-Saharan Africa      | Uncorrected refractive error | Not provided          | 46.4% | Total population |
|                          |      |                 |          |     |      |    |          |      |       |                        | Western Europe               | Uncorrected refractive error | Not provided          | 49.6% | Total population |
| Malhotra et al, 2018[97] | None | Cross-sectional | Clinical | 50+ | 1690 | 10 | PVA<6/18 | SEAR | India | Uncorrected refractive | 192/386                      | 49.7%                        | Total with functional |       |                  |

|                           |                                                    |                           |                       |     |       |       |               |      |               |                              |            | error |                    | difficulty |
|---------------------------|----------------------------------------------------|---------------------------|-----------------------|-----|-------|-------|---------------|------|---------------|------------------------------|------------|-------|--------------------|------------|
| Murthy et al, 2010[98]    | None                                               | Cross-sectional           | Clinical              | 50+ | 5158  | 10    | VA<6/9.5      | SEAR | India         | Use                          | 817/4738   | 17.2% | Total participants |            |
| Zebardast et al, 2017[83] | National Health and Nutritional Examination Survey | Cross-sectional           | Clinical; Self-report | 50+ | 11016 | 9 [8] | PVA<6/12; RAL | AMR  | United States | Uncorrected refractive error | 985/11016  | 8.9%  | Total participants |            |
| Zhao et al, 2010[99]      | China Nine-Province Eye Survey                     | Cross-sectional           | Clinical              | 50+ | 46097 | 10    | VA<=6/12      | WPR  | China         | Met                          | 134/287    | 46.7% | Total with AP      |            |
|                           |                                                    |                           |                       |     |       |       |               |      |               | Need                         | 6592/45747 | 14.4% | Total participants |            |
|                           |                                                    |                           |                       |     |       |       |               |      |               | Unmet                        | 6458/6592  | 98.0% | Total with need    |            |
|                           |                                                    |                           |                       |     |       |       |               |      |               | Use                          | 287/45747  | 0.6%  | Total participants |            |
| Otte et al, 2018[84]      | National Health and Aging Trends Study             | Secondary cross-sectional | Self-report           | 65+ | 7497  | 10    | RAL; AP use   | AMR  | United States | Under-met                    | 2.7/27*    | 10.0% | Total with AP      |            |
| Naël et al, 2019[100]     | Alienor Study                                      | Cross-sectional           | Clinical; Self-report | 78+ | 707   | 9 [2] | PVA<6/12      | EUR  | France        | Uncorrected refractive error | 274/707    | 38.8% | Total participants |            |
|                           |                                                    |                           |                       |     |       |       |               |      |               | Use                          | 540/707    | 76.4% | Total participants |            |

ATA-N=Assistive Technology Assessment-Needs. RAAB=Rapid Assessment of Avoidable Blindness. RAD=Rapid Assessment of Disability. RARE=Rapid Assessment of Refractive Error. RAVI=Rapid Assessment of Visual Impairment. WGQ=Washington Group Questions. RAL=self-reported activity limitations. RE=refractive error. VA=visual acuity. PVA=presenting visual acuity. UCVA=uncorrected visual acuity. DVA=distance visual acuity. NVA=near visual acuity. PNVA=presenting near visual acuity. UCNVA=uncorrected near visual acuity.

\*Results are presented in millions.

Appendix 10: Grouped Glasses Indicators

| AP Type                                 | Citation                      | Tool, Survey, or Dataset              | Study Design    | Approaches            | Ages  | Participants | JBI Score | Functional Difficulty Threshold | WHO Region | Country       | AP access Indicator          |             |       |                                  |
|-----------------------------------------|-------------------------------|---------------------------------------|-----------------|-----------------------|-------|--------------|-----------|---------------------------------|------------|---------------|------------------------------|-------------|-------|----------------------------------|
|                                         |                               |                                       |                 |                       |       |              |           |                                 |            |               | Indicator                    | Calculation | (%)   | Denominator                      |
| Bifocals                                | Marmamula et al, 2013 (a)[51] | RARE                                  | Cross-sectional | Clinical              | 15-49 | 3095         | 9 [4]     | PVA≤6/12                        | SEAR       | India         | Use                          | 181/325     | 55.7% | Total with AP                    |
|                                         | Marmamula et al, 2009[55]     | RARE                                  | Cross-sectional | Clinical; Self-report | 15-50 | 3203         | 10        | UCVA<6/12 ; UCNVA<N8            | SEAR       | India         | Use                          | 214/371     | 57.7% | Total with AP                    |
|                                         | Gupta et al, 2015[72]         | RAVI                                  | Cross-sectional | Clinical; Self-report | 40+   | 2331         | 10        | AP use                          | SEAR       | India         | Use                          | 314/468     | 67.1% | Total with AP                    |
| Glasses (General, unspecified, grouped) | Friedman et al, 2008[101]     | Baltimore Pediatric Eye Disease Study | Cross-sectional | Clinical; Self-report | 0-6   | 2546         | 10        | VA<6/12                         | AMR        | United States | Has AP                       | 26/2546     | 1.0%  | Total participants               |
|                                         | Giordano et al, 2009[102]     | Baltimore Pediatric Eye Disease Study | Cross-sectional | Clinical              | 1-6   | 2298         | 8 [2, 10] | RE subsets                      | AMR        | United States | Need                         | 116/2298    | 5.0%  | Total participants               |
|                                         |                               |                                       |                 |                       |       |              |           |                                 |            |               | Use                          | 29/2298     | 1.3%  | Total participants               |
|                                         | Pai et al, 2011[103]          | Sydney Pediatric Eye Disease Study    | Cross-sectional | Clinical; Self-report | 1-6   | 2461         | 10        | PVA<6/12                        | WPR        | Australia     | Uncorrected refractive error | 53/76       | 69.7% | Total with functional difficulty |
|                                         | Hendler et al, 2016[104]      | None                                  | Cross-sectional | Clinical              | 3-5   | 11260        | 9 [2]     | RE subsets                      | AMR        | United States | Undermet                     | 174/1007    | 17.3% | Total with functional difficulty |
|                                         |                               |                                       |                 |                       |       |              |           |                                 |            |               | Unmet                        | 740/1007    | 73.5% | Total                            |

|                             |                             |                 |                       |      |       |       |            |     |               |                              |           |       |                                   |  |                            |
|-----------------------------|-----------------------------|-----------------|-----------------------|------|-------|-------|------------|-----|---------------|------------------------------|-----------|-------|-----------------------------------|--|----------------------------|
|                             |                             |                 |                       |      |       |       |            |     |               |                              |           |       |                                   |  | with functional difficulty |
| Margines et al, 2020[105]   | None                        | Cross-sectional | Clinical              | 3-5  | 79451 | 10    | RE subsets | AMR | United States | Need                         | 5883/8101 | 72.6% | Total with functional difficulty  |  |                            |
| Mehravaran et al, 2016[106] | None                        | Cross-sectional | Clinical; Self-report | 3-5  | 11260 | 9 [2] | RE subsets | AMR | United States | Use                          | 429/489   | 87.7% | Total participants (at follow-up) |  |                            |
| Zhang et al, 2018[107]      | Nanjing Eye Study           | Cohort          | Clinical              | 4-5  | 1986  | 9 [2] | UCVA<6/12  | WPR | China         | Uncorrected refractive error | 61/78     | 78.2% | Total with functional difficulty  |  |                            |
|                             |                             |                 |                       |      |       |       |            |     |               | Use                          | 89/1961   | 4.5%  | Total participants                |  |                            |
| Ma et al, 2016[108]         | Shanghai Children Eye Study | Cross-sectional | Clinical              | 3-10 | 8267  | 9 [1] | UCVA<=6/12 | WPR | China         | Need                         | 2346/2517 | 93.2% | Total with functional difficulty  |  |                            |
|                             |                             |                 |                       |      |       |       |            |     |               | Use                          | 555/8196  | 6.8%  | Total participants                |  |                            |
| Robaei et al, 2005[109]     | Sydney Myopia Study         | Cross-sectional | Clinical; Self-report | 5-8  | 1740  | 9 [9] | UCVA<6/12  | WPR | Australia     | Met                          | 28/77     | 36.4% | Total with AP                     |  |                            |
|                             |                             |                 |                       |      |       |       |            |     |               | Need                         | 77/1738   | 4.4%  | Total participants                |  |                            |
|                             |                             |                 |                       |      |       |       |            |     |               | Under-met                    | 23/77     | 29.9% | Total with AP                     |  |                            |
|                             |                             |                 |                       |      |       |       |            |     |               | Unmet                        | 26/1738   | 1.5%  | Total                             |  |                            |

|                              |      |                 |                       |      |      |       |            |     |        |                              |           |         |                                  |                    |
|------------------------------|------|-----------------|-----------------------|------|------|-------|------------|-----|--------|------------------------------|-----------|---------|----------------------------------|--------------------|
|                              |      |                 |                       |      |      |       |            |     |        |                              |           |         |                                  | participants       |
|                              |      |                 |                       |      |      |       |            |     |        |                              | Use       | 77/1738 | 4.4%                             | Total participants |
| He et al, 2014 (b)[110]      | None | Cross-sectional | Clinical; Self-report | 2-12 | 9512 | 10    | UCVA<6/12  | WPR | China  | Uncorrected refractive error | 1795/2006 | 89.5%   | Total with functional difficulty |                    |
|                              |      |                 |                       |      |      |       |            |     |        | Undermet                     | 81/311    | 26.0%   | Total with AP                    |                    |
|                              |      |                 |                       |      |      |       |            |     |        | Use                          | 311/2006  | 15.5%   | Total with functional difficulty |                    |
| Hashemi et al, 2017 (a)[111] | None | Cross-sectional | Clinical              | 7    | 4106 | 10    | RE subsets | EMR | Iran   | Coverage                     | 56/168    | 33.3%   | Total participants               |                    |
|                              |      |                 |                       |      |      |       |            |     |        | Met                          | 56/4072   | 1.4%    | Total participants               |                    |
|                              |      |                 |                       |      |      |       |            |     |        | Need                         | 168/4072  | 4.1%    | Total participants               |                    |
|                              |      |                 |                       |      |      |       |            |     |        | Unmet                        | 112/4072  | 2.8%    | Total participants               |                    |
| Gursoy et al, 2013[112]      | None | Cross-sectional | Clinical; Self-report | 7-8  | 721  | 9 [2] | RE subsets | EUR | Turkey | Need                         | 145/709   | 20.5%   | Total participants               |                    |
|                              |      |                 |                       |      |      |       |            |     |        | Unmet                        | 80/145    | 55.2%   | Total with need                  |                    |
|                              |      |                 |                       |      |      |       |            |     |        | Use                          | 65/145    | 44.8%   | Total with need                  |                    |

|                             |                                    |                 |                       |      |      |          |            |     |              |                                  |          |       |                                  |
|-----------------------------|------------------------------------|-----------------|-----------------------|------|------|----------|------------|-----|--------------|----------------------------------|----------|-------|----------------------------------|
| Casson et al, 2012[113]     | Refractive Error Study in Children | Cross-sectional | Clinical              | 6-11 | 2899 | 9 [8]    | PVA<6/12   | WPR | Laos         | Uncorrected refractive error     | 112/2842 | 3.9%  | Total participants               |
|                             |                                    |                 |                       |      |      |          |            |     |              | Use                              | 0/2869   | 0.0%  | Total participants               |
| Hashim et al, 2008[114]     | None                               | Cross-sectional | Clinical              | 6-12 | 705  | 10       | UCVA<=6/12 | WPR | Malaysia     | Met                              | 24/49    | 49.0% | Total with functional difficulty |
|                             |                                    |                 |                       |      |      |          |            |     |              | Unmet                            | 25/49    | 51.0% | Total with functional difficulty |
| Aldebasi, 2014[115]         | None                               | Cross-sectional | Clinical              | 6-13 | 5176 | 10       | RE subsets | EMR | Saudi Arabia | Met                              | 92/5176  | 1.8%  | Total participants               |
|                             |                                    |                 |                       |      |      |          |            |     |              | Uncorrected refractive error     | 846/5176 | 16.3% | Total participants               |
|                             |                                    |                 |                       |      |      |          |            |     |              | Under-corrected refractive error | 25/5176  | 0.5%  | Total participants               |
| Choy et al, 2020[116]       | None                               | Cross-sectional | Clinical; Self-report | 6-13 | 1396 | 8 [2, 6] | RE subsets | WPR | China        | Use                              | 247/759  | 32.5% | Total with functional difficulty |
| Harrington et al, 2019[117] | Ireland Eye Study                  | Cross-sectional | Clinical; Self-report | 6-13 | 901  | 10       | VA<6/12    | EUR | Ireland      | Has AP                           | 311/1626 | 19.1% | Total participants               |
|                             |                                    |                 |                       |      |      |          |            |     |              | Use                              | 164/1626 | 10.1% | Total participants               |

|                             |                                                       |                 |                       |      |      |        |          |      |                |                              |           |        |                                  |
|-----------------------------|-------------------------------------------------------|-----------------|-----------------------|------|------|--------|----------|------|----------------|------------------------------|-----------|--------|----------------------------------|
| O'Donoghue et al, 2010[118] | Northern Ireland Childhood Errors of Refraction Study | Cross-sectional | Clinical; Self-report | 6-13 | 1053 | 10     | VA<6/12  | EUR  | United Kingdom | Uncorrected refractive error | 271/1051  | 25.8%  | Total participants               |
|                             |                                                       |                 |                       |      |      |        |          |      |                | Use                          | 217/1053  | 20.6%  | Total participants               |
| Al Wadaani et al, 2012[119] | None                                                  | Cross-sectional | Clinical; Self-report | 6-14 | 2002 | 9 [4]  | PVA<6/18 | EMR  | Saudi Arabia   | Use                          | 26/274    | 9.5%   | Total with functional difficulty |
| Gupta et al, 2012[120]      | None                                                  | Cross-sectional | Clinical; Self-report | 5-15 | 2000 | 9 [10] | VA<6/9   | SEAR | India          | Uncorrected refractive error | 84/2000   | 4.2%   | Total participants               |
| Hameed, 2016[121]           | None                                                  | Cross-sectional | Clinical              | 5-15 | 1644 | 9 [2]  | VA<6/9   | EMR  | Pakistan       | Use                          | 92/1644   | 5.6%   | Total participants               |
| He et al, 2004[122]         | None                                                  | Cross-sectional | Clinical; Self-report | 5-15 | 4364 | 10     | VA<6/9.5 | WPR  | China          | Uncorrected refractive error | 1272/1364 | 93.3%  | Total with functional difficulty |
|                             |                                                       |                 |                       |      |      |        |          |      |                | Use                          | 800/4364  | 18.3%  | Total participants               |
| He et al, 2005[123]         | None                                                  | Cross-sectional | Clinical; Self-report | 5-15 | 5053 | 10     | VA<=6/12 | WPR  | China          | Coverage                     | 684/919   | (74.4) | Total with need                  |
|                             |                                                       |                 |                       |      |      |        |          |      |                | Need                         | 919/4359  | (21.1) | Total participants               |
|                             |                                                       |                 |                       |      |      |        |          |      |                | Undermet                     | 190/635   | (29.9) | Total with AP                    |
|                             |                                                       |                 |                       |      |      |        |          |      |                | Unmet                        | 455/919   | (50.6) | Total with                       |



|                             |      |                           |                       |      |       |           |            |      |          |        |            |       |                                  |      |
|-----------------------------|------|---------------------------|-----------------------|------|-------|-----------|------------|------|----------|--------|------------|-------|----------------------------------|------|
|                             |      |                           |                       |      |       |           |            |      |          |        |            |       |                                  | need |
| Kassa et al, 2003[124]      | None | Cross-sectional           | Clinical; Self-report | 5-15 | 1156  | 9 [10]    | VA<6/12    | AFR  | Ethiopia | Need   | 86/1134    | 7.6%  | Total participants               |      |
| Hu et al, 2019[125]         | None | Cross-sectional           | Clinical              | 9-12 | 10234 | 10        | UCVA<=6/12 | WPR  | China    | Has AP | 101/768    | 13.2% | Total with need                  |      |
|                             |      |                           |                       |      |       |           |            |      |          | Need   | 768/10037  | 7.7%  | Total participants               |      |
| Kaur et al, 2016[126]       | None | Cross-sectional           | Clinical; Self-report | 5-16 | 30205 | 8 [4, 10] | VA<6/9     | SEAR | India    | Need   | 1581/30298 | 5.2%  | Total participants               |      |
| Dandona et al, 2002[127]    | None | Cross-sectional           | Clinical              | 7-15 | 4074  | 10        | VA<6/12    | SEAR | India    | Has AP | 23/4074    | 0.6%  | Total participants               |      |
| Falkenberg et al, 2019[128] | None | Secondary cross-sectional | Self-report           | 7-15 | 782   | 9 [2]     | RE subsets | EUR  | Norway   | Need   | 384/650    | 59.1% | Total referred                   |      |
| Goh et al, 2004[129]        | None | Cross-sectional           | Clinical              | 7-15 | 4634  | 10        | VA<6/9.5   | WPR  | Malaysia | Met    | 323/723    | 44.7% | Total with need                  |      |
|                             |      |                           |                       |      |       |           |            |      |          | Need   | 723/789    | 91.6% | Total with functional difficulty |      |
|                             |      |                           |                       |      |       |           |            |      |          | Unmet  | 400/723    | 55.3% | Total with need                  |      |
|                             |      |                           |                       |      |       |           |            |      |          | Use    | 443/4615   | 9.6%  | Total participants               |      |
| Kedir et al, 2014[130]      | None | Cross-sectional           | Clinical              | 7-15 | 592   | 9 [10]    | VA<=6/18   | AFR  | Ethiopia | Use    | 0/20       | 0.0%  | Total with functional difficulty |      |

|                             |                                    |                           |                       |       |       |       |            |      |           |                              |            |       |                                  |
|-----------------------------|------------------------------------|---------------------------|-----------------------|-------|-------|-------|------------|------|-----------|------------------------------|------------|-------|----------------------------------|
| Pavithra et al, 2014[131]   | None                               | Cross-sectional           | Clinical              | 7-15  | 1378  | 9 [4] | VA<6/12    | SEAR | India     | Use                          | 48/83      | 57.8% | Total with functional difficulty |
| Wang et al, 2015[132]       | None                               | Cross-sectional           | Clinical              | 10-12 | 4376  | 10    | RE subsets | WPR  | China     | Need                         | 674/850    | 79.3% | Total with functional difficulty |
|                             |                                    |                           |                       |       |       |       |            |      |           | Use                          | 159/674    | 23.6% | Total with need                  |
| Yekta et al, 2010[133]      | None                               | Cross-sectional           | Clinical; Self-report | 7-15  | 1872  | 10    | VA<=6/12   | EMR  | Iran      | Uncorrected refractive error | 121/1872   | 6.5%  | Total participants               |
| Zhu et al, 2019[134]        | Refractive Error Study in Children | Secondary cross-sectional | Clinical              | 5-17  | 13702 | 10    | UCVA<=6/12 | WPR  | China     | Need                         | 4743/12334 | 38.5% | Total participants               |
| Li et al, 2014[135]         | Heilongjiang Eye Study             | Cross-sectional           | Clinical              | 5-18  | 1700  | 10    | VA<6/9.5   | WPR  | China     | Has AP                       | 20/1675    | 1.2%  | Total participants               |
| Barria et al, 2018[136]     | Refractive Error Study in Children | Cross-sectional           | Clinical              | 5-19  | 5412  | 10    | VA<=6/12   | AMR  | Chile     | Need                         | 476/691    | 68.9% | Total with functional difficulty |
|                             |                                    |                           |                       |       |       |       |            |      |           | Use                          | 521/5412   | 9.6%  | Total with functional difficulty |
| Robaei et al, 2006 (a)[137] | Sydney Childhood Eye Study         | Cross-sectional           | Clinical              | 11-13 | 2353  | 10    | VA<6/12    | WPR  | Australia | Need                         | 96/117     | 82.1% | Total with functional difficulty |

|  |                                   |                                  |                     |                          |       |      |       |           |     |           |               |          |       |                                               |
|--|-----------------------------------|----------------------------------|---------------------|--------------------------|-------|------|-------|-----------|-----|-----------|---------------|----------|-------|-----------------------------------------------|
|  |                                   |                                  |                     |                          |       |      |       |           |     |           | Under-<br>met | 8/117    | 6.8%  | Total<br>with<br>functiona<br>l<br>difficulty |
|  | Robaei et<br>al, 2006<br>(b)[138] | Sydney<br>Childhood<br>Eye Study | Cross-<br>sectional | Clinical;<br>Self-report | 12-12 | 2353 | 10    | PVA<6/12  | WPR | Australia | Met           | 403/2353 | 17.1% | Total<br>participa<br>nts                     |
|  |                                   |                                  |                     |                          |       |      |       |           |     |           | Under-<br>met | 37/2353  | 1.6%  | Total<br>with AP                              |
|  |                                   |                                  |                     |                          |       |      |       |           |     |           | Unmet         | 8/2353   | 0.3%  | Total<br>with<br>functiona<br>l<br>difficulty |
|  |                                   |                                  |                     |                          |       |      |       |           |     |           | Use           | 440/2353 | 18.7% | Total<br>participa<br>nts                     |
|  | Yamamah<br>et al,<br>2015[139]    | None                             | Cross-<br>sectional | Clinical;<br>Self-report | 7-17  | 2070 | 10    | VA<6/9    | EMR | Egypt     | Need          | 218/2070 | 10.5% | Total<br>participa<br>nts                     |
|  |                                   |                                  |                     |                          |       |      |       |           |     |           | Use           | 34/2070  | 1.6%  | Total<br>participa<br>nts                     |
|  | Mehari et<br>al,<br>2013[140]     | None                             | Cross-<br>sectional | Clinical;<br>Self-report | 7-18  | 5470 | 10    | PVA<=6/12 | AFR | Ethiopia  | Met           | 7/11     | 63.6% | Total<br>with AP                              |
|  |                                   |                                  |                     |                          |       |      |       |           |     |           | Under-<br>met | 4/11     | 36.4% | Total<br>with AP                              |
|  |                                   |                                  |                     |                          |       |      |       |           |     |           | Use           | 11/4238  | 0.3%  | Total<br>participa<br>nts                     |
|  | Plainis et<br>al,<br>2009[141]    | None                             | Cross-<br>sectional | Clinical;<br>Self-report | 10-15 | 898  | 9 [2] | VA<6/12   | EUR | Bulgaria  | Use           | 27/310   | 8.7%  | Total<br>participa<br>nts                     |
|  |                                   |                                  |                     |                          |       |      |       |           |     | Greece    | Use           | 137/588  | 23.3% | Total<br>participa<br>nts                     |

|                          |                                    |                 |                       |       |      |       |            |      |          |                              |           |       |                                  |
|--------------------------|------------------------------------|-----------------|-----------------------|-------|------|-------|------------|------|----------|------------------------------|-----------|-------|----------------------------------|
| Sapkota et al, 2008[142] | None                               | Cross-sectional | Clinical; Self-report | 10-15 | 4282 | 10    | VA<6/9.5   | SEAR | Nepal    | Uncorrected refractive error | 3483/4282 | 81.3% | Total participants               |
|                          |                                    |                 |                       |       |      |       |            |      |          | Use                          | 615/4282  | 14.4% | Total participants               |
| Salomão et al, 2008[143] | None                               | Cross-sectional | Clinical              | 11-14 | 2441 | 10    | VA<=6/12   | AMR  | Brazil   | Met                          | 52/118    | 44.1% | Total with functional difficulty |
|                          |                                    |                 |                       |       |      |       |            |      |          | Undermet                     | 11/118    | 9.3%  | Total with functional difficulty |
|                          |                                    |                 |                       |       |      |       |            |      |          | Unmet                        | 55/118    | 46.6% | Total with functional difficulty |
|                          |                                    |                 |                       |       |      |       |            |      |          | Use                          | 63/118    | 53.4% | Total with functional difficulty |
| Arafa et al, 2019[144]   | None                               | Cross-sectional | Clinical; Self-report | 12-14 | 472  | 10    | VA<6/9     | EMR  | Egypt    | Use                          | 69/469    | 14.7% | Total participants               |
| Gao et al, 2012[145]     | Refractive Error Study in Children | Cross-sectional | Clinical              | 12-14 | 5527 | 10    | UCVA<=6/12 | WPR  | Cambodia | Uncorrected refractive error | 181/226   | 80.1% | Total with functional difficulty |
| Qian et al, 2018[146]    | None                               | Cross-sectional | Clinical; Self-report | 13    | 2346 | 9 [2] | UCVA<=6/12 | WPR  | China    | Need                         | 483/579   | 83.4% | Total with functional difficulty |

|                              |                                          |                 |                       |       |      |          |            |     |         |        |          |                              |                                  |       |                                  |
|------------------------------|------------------------------------------|-----------------|-----------------------|-------|------|----------|------------|-----|---------|--------|----------|------------------------------|----------------------------------|-------|----------------------------------|
|                              |                                          |                 |                       |       |      |          |            |     |         |        |          | Uncorrected refractive error | 579/2346                         | 24.7% | Total participants               |
|                              |                                          |                 |                       |       |      |          |            |     |         |        |          | Use                          | 172/579                          | 29.7% | Total with functional difficulty |
| Ajaiyeoba et al, 2007[147]   | None                                     | Cross-sectional | Clinical              | 4-24  | 1144 | 8 [7, 9] | VA<6/18    | AFR | Nigeria | Has AP | 2/1144   | 0.2%                         | Total participants               |       |                                  |
|                              |                                          |                 |                       |       |      |          |            |     |         |        |          | Need                         | 15/1144                          | 1.3%  | Total participants               |
| Congdon et al, 2008 (a)[148] | None                                     | Cross-sectional | Clinical; Self-report | 11-17 | 1945 | 10       | UCVA<=6/12 | WPR | China   | Met    | 414/770  | 53.8%                        | Total with functional difficulty |       |                                  |
|                              |                                          |                 |                       |       |      |          |            |     |         |        |          | Unmet                        | 674/1892                         | 35.6% | Total participants               |
|                              |                                          |                 |                       |       |      |          |            |     |         |        |          | Use                          | 500/1892                         | 26.4% | Total participants               |
| Congdon et al, 2008 (b)[149] | Xichang Pediatric Refractive Error Study | Cross-sectional | Clinical; Self-report | 11-17 | 1892 | 10       | UCVA<=6/12 | WPR | China   | Has AP | 647/1892 | 34.2%                        | Total participants               |       |                                  |
|                              |                                          |                 |                       |       |      |          |            |     |         |        |          | Met                          | 357/948                          | 37.7% | Total with functional difficulty |
|                              |                                          |                 |                       |       |      |          |            |     |         |        |          | Need                         | 948/1892                         | 50.1% | Total participants               |

|                              |                                                      |                     |                          |       |      |       |                |     |       |     |               |          |                                             |                                               |
|------------------------------|------------------------------------------------------|---------------------|--------------------------|-------|------|-------|----------------|-----|-------|-----|---------------|----------|---------------------------------------------|-----------------------------------------------|
|                              |                                                      |                     |                          |       |      |       |                |     |       |     | Under-<br>met | 119/948  | 12.6%                                       | Total<br>with<br>functiona<br>l<br>difficulty |
|                              |                                                      |                     |                          |       |      |       |                |     |       |     | Unmet         | 368/948  | 38.8%                                       | Total<br>with<br>functiona<br>l<br>difficulty |
|                              |                                                      |                     |                          |       |      |       |                |     |       |     | Use           | 476/948  | 50.2%                                       | Total<br>with<br>functiona<br>l<br>difficulty |
| Li et al,<br>2008[150]       | Xichang<br>Pediatric<br>Refractive<br>Error<br>Study | Cross-<br>sectional | Clinical;<br>Self-report | 11-17 | 1892 | 10    | UCVA<=6/1<br>2 | WPR | China | Met | 210/597       | 35.2%    | Total<br>with<br>need                       |                                               |
|                              |                                                      |                     |                          |       |      |       |                |     |       |     | Need          | 597/1892 | 31.6%                                       | Total<br>participa<br>nts                     |
|                              |                                                      |                     |                          |       |      |       |                |     |       |     | Unmet         | 387/597  | 64.8%                                       | Total<br>with<br>need                         |
| Zhang et<br>al,<br>2009[151] | See Well<br>to Learn<br>Well<br>Project              | Cross-<br>sectional | Clinical;<br>Self-report | 14-15 | 3226 | 9 [4] | PVA<6/12       | WPR | China | Met | 301/588       | 51.2%    | Total<br>with AP<br>and<br>complete<br>data |                                               |
|                              |                                                      |                     |                          |       |      |       |                |     |       |     | Under-<br>met | 287/588  | 48.8%                                       | Total<br>with AP<br>and<br>complete<br>data   |
|                              |                                                      |                     |                          |       |      |       |                |     |       |     | Use           | 733/2905 | 25.2%                                       | Total<br>participa                            |

|                         |      |                 |                       |       |      |       |            |     |              |          |           |       |                                  |     |
|-------------------------|------|-----------------|-----------------------|-------|------|-------|------------|-----|--------------|----------|-----------|-------|----------------------------------|-----|
|                         |      |                 |                       |       |      |       |            |     |              |          |           |       |                                  | nts |
| He et al, 2007[152]     | None | Cross-sectional | Clinical; Self-report | 13-17 | 2454 | 10    | UCVA<6/12  | WPR | China        | Need     | 638/649   | 98.3% | Total with functional difficulty |     |
|                         |      |                 |                       |       |      |       |            |     |              | Undermet | 51/638    | 8.0%  | Total with need                  |     |
|                         |      |                 |                       |       |      |       |            |     |              | Unmet    | 387/638   | 60.7% | Total with need                  |     |
|                         |      |                 |                       |       |      |       |            |     |              | Use      | 302/649   | 46.5% | Total with functional difficulty |     |
| Abu et al, 2015[153]    | None | Cross-sectional | Clinical              | 9-22  | 1252 | 9 [4] | VA<=6/12   | AFR | Ghana        | Need     | 37/1029   | 3.6%  | Total participants               |     |
|                         |      |                 |                       |       |      |       |            |     |              | Use      | 7/1029    | 0.7%  | Total participants               |     |
| Alsaqr et al, 2018[154] | None | Cross-sectional | Clinical; Self-report | 12-20 | 1007 | 9 [4] | RE subsets | EMR | Saudi Arabia | Use      | 242/555   | 43.6% | Total with functional difficulty |     |
| Zhao et al, 2020[155]   | None | Cross-sectional | Clinical; Self-report | 16-17 | 5583 | 9 [2] | PVA<=6/12  | WPR | China        | Has AP   | 2763/4026 | 68.6% | Total with functional difficulty |     |
|                         |      |                 |                       |       |      |       |            |     |              | Need     | 4026/5583 | 72.1% | Total participants               |     |
|                         |      |                 |                       |       |      |       |            |     |              | Undermet | 994/2763  | 36.0% | Total with AP                    |     |

|                               |      |                 |                       |       |      |       |            |      |              |                              |           |       |                                  |
|-------------------------------|------|-----------------|-----------------------|-------|------|-------|------------|------|--------------|------------------------------|-----------|-------|----------------------------------|
| Wu et al, 2015[156]           | None | Cross-sectional | Clinical              | 16-18 | 4798 | 9 [4] | RE subsets | WPR  | China        | Unmet                        | 740/3773  | 19.6% | Total with functional difficulty |
|                               |      |                 |                       |       |      |       |            |      |              | Use                          | 1525/3773 | 40.4% | Total with functional difficulty |
| Wedner et al, 2002[157]       | None | Cross-sectional | Clinical; Self-report | 11-27 | 2511 | 10    | VA<=6/12   | AFR  | Tanzania     | Met                          | 47/154    | 30.5% | Total with functional difficulty |
|                               |      |                 |                       |       |      |       |            |      |              | Use                          | 126/2511  | 5.0%  | Total participants               |
| Naidoo et al, 2016[86]        | RARE | Cross-sectional | Self-report           | 15-36 | 1516 | 10    | PVA<6/12   | AFR  | South Africa | Coverage                     | 17/34     | 50.0% | Total with need                  |
|                               |      |                 |                       |       |      |       |            |      |              | Met                          | 17/34     | 50.0% | Total with need                  |
|                               |      |                 |                       |       |      |       |            |      |              | Uncorrected refractive error | 23/1516   | 1.5%  | Total participants               |
|                               |      |                 |                       |       |      |       |            |      |              | Unmet                        | 17/34     | 50.0% | Total with need                  |
|                               |      |                 |                       |       |      |       | AP use     | AFR  | South Africa | Use                          | 6/58      | 10.3% | Total with AP                    |
| Marmamula et al, 2013 (a)[51] | RARE | Cross-sectional | Clinical              | 15-49 | 3095 | 9 [4] | PVA<=6/12  | SEAR | India        | Uncorrected refractive error | 111/3095  | 3.6%  | Total participants               |
|                               |      |                 |                       |       |      |       |            |      |              | Use                          | 300/3095  | 9.7%  | Total participants               |



|                           |                                  |                 |                       |       |      |           |                     |      |            |                              |          |       |                                  |     |
|---------------------------|----------------------------------|-----------------|-----------------------|-------|------|-----------|---------------------|------|------------|------------------------------|----------|-------|----------------------------------|-----|
|                           |                                  |                 |                       |       |      |           |                     |      |            |                              |          |       |                                  | nts |
| Muhit et al, 2018[52]     | RARE                             | Cross-sectional | Clinical; Self-report | 15-49 | 3050 | 10        | PVA<6/18            | SEAR | Bangladesh | Coverage                     | 19/143   | 13.3% | Total with need                  |     |
|                           |                                  |                 |                       |       |      |           |                     |      |            | Met                          | 19/143   | 13.3% | Total with need                  |     |
|                           |                                  |                 |                       |       |      |           |                     |      |            | Unmet                        | 124/143  | 86.7% | Total with need                  |     |
| Chan et al, 2013[53]      | RARE                             | Cross-sectional | Clinical              | 15-50 | 3171 | 9 [4]     | PVA<6/12            | AFR  | Eritrea    | Coverage                     | 45/203   | 22.2% | Total with need                  |     |
|                           |                                  |                 |                       |       |      |           |                     |      |            | Met                          | 45/203   | 22.2% | Total with need                  |     |
|                           |                                  |                 |                       |       |      |           |                     |      |            | Unmet                        | 158/203  | 77.8% | Total with need                  |     |
| Loughman et al, 2015[54]  | RARE                             | Cross-sectional | Clinical; Self-report | 15-50 | 3457 | 9 [4]     | DVA<6/12; NVA<6/12  | AFR  | Mozambique | Use                          | 161/3452 | 4.7%  | Total participants               |     |
| Marmamula et al, 2009[55] | RARE                             | Cross-sectional | Clinical; Self-report | 15-50 | 3203 | 10        | UCVA<6/12; UCNVA<N8 | SEAR | India      | Use                          | 371/3203 | 11.6% | Total participants               |     |
| Senicato et al, 2012[158] | Campinas Municipal Health Survey | Cross-sectional | Self-report           | 20-59 | 508  | 8 [2, 10] | AP use              | AMR  | Brazil     | Use                          | 226/508  | 44.5% | Total participants               |     |
| Ferraz et al, 2014[159]   | None                             | Cross-sectional | Clinical              | 1-90  | 7654 | 10        | PVA<6/12            | AMR  | Brazil     | Unmet                        | 143/2193 | 6.5%  | Total with functional difficulty |     |
| Hashemi et al, 2015[160]  | None                             | Cross-sectional | Clinical              | 1-90  | 2635 | 9 [8]     | VA<6/12             | EMR  | Iran       | Uncorrected refractive error | 85/156   | 54.5% | Total with functional            |     |

|                              |                               |                           |                       |       |              |       |            |     |          |                              |          |       |                                  |            |
|------------------------------|-------------------------------|---------------------------|-----------------------|-------|--------------|-------|------------|-----|----------|------------------------------|----------|-------|----------------------------------|------------|
|                              |                               |                           |                       |       |              |       |            |     |          |                              |          |       |                                  | difficulty |
| Hashemi et al, 2017 (b)[161] | None                          | Cross-sectional           | Clinical; Self-report | 1-93  | 3314         | 9 [4] | RE subsets | EMR | Iran     | Met                          | 256/3314 | 7.7%  | Total participants               |            |
|                              |                               |                           |                       |       |              |       |            |     |          | Need                         | 629/3314 | 19.0% | Total participants               |            |
|                              |                               |                           |                       |       |              |       |            |     |          | Unmet                        | 373/3314 | 11.3% | Total participants               |            |
| Fotouhi et al, 2006[162]     | Tehran Eye Study              | Cross-sectional           | Clinical; Self-report | 5-95  | 4565         | 9 [9] | PVA<6/12   | EMR | Iran     | Coverage                     | 416/646  | 64.4% | Total with need                  |            |
|                              |                               |                           |                       |       |              |       |            |     |          | Met                          | 416/4317 | 9.6%  | Total participants               |            |
|                              |                               |                           |                       |       |              |       |            |     |          | Need                         | 646/4317 | 15.0% | Total participants               |            |
|                              |                               |                           |                       |       |              |       |            |     |          | Unmet                        | 230/4317 | 5.3%  | Total participants               |            |
| Danermark et al, 2012[163]   | National Public Health Survey | Secondary cross-sectional | Self-report           | 18-84 | Not provided | 10    | RAL        | EUR | Sweden   | Need                         | N/A      | 50.0% | Total population                 |            |
| Desalegn et al, 2016[164]    | None                          | Cross-sectional           | Self-report           | 18-86 | 780          | 10    | AP use     | AFR | Ethiopia | Use                          | 194/780  | 24.9% | Total participants               |            |
| Hashemi et al, 2012[165]     | None                          | Cohort                    | Clinical; Self-report | 40-64 | 5190         | 10    | VA<6/18    | EMR | Iran     | Uncorrected refractive error | 45/118   | 38.1% | Total with functional difficulty |            |
| Ertekin et al, 2016[166]     | None                          | Cross-sectional           | Clinical; Self-report | 5-100 | 1938         | 10    | VA<6/10    | EUR | Turkey   | Use                          | 134/1938 | 6.9%  | Total participants               |            |

|                                  |               |                           |                            |    |       |       |          |      |                                               |                              |             |       |                    |
|----------------------------------|---------------|---------------------------|----------------------------|----|-------|-------|----------|------|-----------------------------------------------|------------------------------|-------------|-------|--------------------|
| Latorre-Arteaga et al, 2018[167] | None          | Cross-sectional           | Self-report                | 0+ | 302   | 9 [2] | RAL      | EUR  | Spain                                         | Use                          | 22/302      | 7.3%  | Total participants |
| Sheeladevi et al, 2019[168]      | None          | Meta analysis             | Multiple secondary sources | 0+ | 34349 | 10    | PVA<6/18 | SEAR | India                                         | Uncorrected refractive error | 3504/34349  | 10.2% | Total participants |
| Tahhan et al, 2009[169]          | None          | Cross-sectional           | Clinical; Self-report      | 0+ | 14669 | 9 [2] | VA<6/12  | SEAR | Sri Lanka                                     | Uncorrected refractive error | 11388/14699 | 77.5% | Total participants |
| Danquah et Brus, 2013[25]        | WGQ Short set | Mixed-methods             | Self-report                | 5+ | 3122  | 10    | RAL      | AMR  | Haiti                                         | Unmet                        | 40/178      | 22.5% | Total participants |
| Resnikoff et al, 2008[170]       | None          | Secondary cross-sectional | Multiple secondary sources | 5+ | 1     | 10    | PVA<6/18 | AFR  | Mauritania                                    | Uncorrected refractive error | 6/640       | 0.9%  | Total population   |
|                                  |               |                           |                            |    |       |       |          | AMR  | Brazil; Chile; Argentina; Paraguay; Venezuela | Uncorrected refractive error | 6/432       | 1.4%  | Total population   |
|                                  |               |                           |                            |    |       |       |          |      | Guatemala; Peru                               | Uncorrected refractive error | 1/66        | 1.5%  | Total population   |
|                                  |               |                           |                            |    |       |       |          |      | United States                                 | Uncorrected refractive error | 6/305       | 2.0%  | Total population   |
|                                  |               |                           |                            |    |       |       |          | EMR  | Iran; Qatar; Oman; Lebanon                    | Uncorrected refractive error | 3/264       | 1.1%  | Total population   |

|                               |                                 |                     |                          |       |      |        |            |     |           |                                                                                         |                                        |          |       |                         |
|-------------------------------|---------------------------------|---------------------|--------------------------|-------|------|--------|------------|-----|-----------|-----------------------------------------------------------------------------------------|----------------------------------------|----------|-------|-------------------------|
|                               |                                 |                     |                          |       |      |        |            |     | EUR       | Armenia;<br>Turkmeni<br>stan                                                            | Uncorrec<br>ted<br>refractive<br>error | 7/431    | 1.6%  | Total<br>populatio<br>n |
|                               |                                 |                     |                          |       |      |        |            |     |           | Ireland;<br>Italy                                                                       | Uncorrec<br>ted<br>refractive<br>error | 8/398    | 2.0%  | Total<br>populatio<br>n |
|                               |                                 |                     |                          |       |      |        |            |     | Global    | World                                                                                   | Uncorrec<br>ted<br>refractive<br>error | 153/5751 | 2.7%  | Total<br>populatio<br>n |
|                               |                                 |                     |                          |       |      |        |            |     | SEAR      | Banglades<br>h                                                                          | Uncorrec<br>ted<br>refractive<br>error | 12/317   | 3.8%  | Total<br>populatio<br>n |
|                               |                                 |                     |                          |       |      |        |            |     |           | India                                                                                   | Uncorrec<br>ted<br>refractive<br>error | 39/967   | 4.0%  | Total<br>populatio<br>n |
|                               |                                 |                     |                          |       |      |        |            |     | WPR       | Australia                                                                               | Uncorrec<br>ted<br>refractive<br>error | 1/144    | 0.7%  | Total<br>populatio<br>n |
|                               |                                 |                     |                          |       |      |        |            |     |           | China                                                                                   | Uncorrec<br>ted<br>refractive<br>error | 54/1229  | 4.4%  | Total<br>populatio<br>n |
|                               |                                 |                     |                          |       |      |        |            |     |           | Malaysia;<br>Singapore<br>;<br>Myanmar;<br>Philippine<br>s;<br>Cambodia<br>;<br>Vietnam | Uncorrec<br>ted<br>refractive<br>error | 8/554    | 1.4%  | Total<br>populatio<br>n |
| Rosman et<br>al,<br>2009[171] | Singapore<br>Malay Eye<br>Study | Cross-<br>sectional | Clinical;<br>Self-report | 40-79 | 3280 | 9 [10] | RE subsets | WPR | Singapore | Under-<br>met                                                                           |                                        | 180/1250 | 14.4% | Total<br>with AP        |

|                             |                                                    |                           |                       |       |       |       |                     |     |               |                              |                 |          |                                  |                    |
|-----------------------------|----------------------------------------------------|---------------------------|-----------------------|-------|-------|-------|---------------------|-----|---------------|------------------------------|-----------------|----------|----------------------------------|--------------------|
|                             |                                                    |                           |                       |       |       |       |                     |     |               |                              | Unmet           | 454/3115 | 14.6%                            | Total participants |
| Huang et al, 2013[172]      | Singapore Malay Eye Study                          | Cross-sectional           | Clinical; Self-report | 40-80 | 3280  | 10    | VA<=6/18            | WPR | Singapore     | Need                         | 1758/2112       | 83.2%    | Total with functional difficulty |                    |
|                             |                                                    |                           |                       |       |       |       |                     |     |               | Use                          | 1440/2112       | 68.2%    | Total with functional difficulty |                    |
| Vitale et al, 2006 (b)[173] | National Health and Nutritional Examination Survey | Cross-sectional           | Clinical; Self-report | 12+   | 15193 | 9 [8] | PVA<6/15            | AMR | United States | Met                          | 992/1190        | 83.4%    | Total with functional difficulty |                    |
|                             |                                                    |                           |                       |       |       |       |                     |     |               | Uncorrected refractive error | 703/13265       | 5.3%     | Total participants               |                    |
| Berardi et al, 2020[27]     | Canadian Survey on Disability                      | Secondary cross-sectional | Self-report           | 15+   | 45443 | 10    | RAL                 | AMR | Canada        | Unmet                        | 72360/2710514   | 2.7%     | Total population                 |                    |
|                             |                                                    |                           |                       |       |       |       |                     |     |               | Use                          | 3050750/2710514 | 112.6%   | Total population                 |                    |
| Mashayo et al, 2014[174]    | None                                               | Cross-sectional           | Clinical              | 15+   | 3230  | 9 [4] | PVA<6/12; PNVA<6/12 | AFR | Tanzania      | Coverage                     | 4/237           | 1.7%     | Total with need                  |                    |
|                             |                                                    |                           |                       |       |       |       |                     |     |               | Met                          | 4/237           | 1.7%     | Total with need                  |                    |
|                             |                                                    |                           |                       |       |       |       |                     |     |               | Uncorrected refractive error | 237/3230        | 7.3%     | Total participants               |                    |
|                             |                                                    |                           |                       |       |       |       |                     |     |               | Under-                       | 51/55           | 92.7%    | Total                            |                    |

|                          |                                                                   |                 |                       |        |       |       |          |      |            |                              |             |         |                                                   |                 |
|--------------------------|-------------------------------------------------------------------|-----------------|-----------------------|--------|-------|-------|----------|------|------------|------------------------------|-------------|---------|---------------------------------------------------|-----------------|
|                          |                                                                   |                 |                       |        |       |       |          |      |            |                              | met         |         |                                                   | with AP         |
|                          |                                                                   |                 |                       |        |       |       |          |      |            |                              | Unmet       | 233/237 | 98.3%                                             | Total with need |
| Pryor et al, 2018[30]    | ATA-N, RAD, WGQ                                                   | Cross-sectional | Self-report           | 18+    | 4253  | 9 [4] | AP use   | SEAR | Bangladesh | Use                          | 30/112      | 26.8%   | Total with functional difficulty and using any AP |                 |
| Aljied et al, 2018[175]  | Comprehensive Cohort of the Canadian Longitudinal Study on Aging  | Cross-sectional | Clinical; Self-report | 45-92  | 29666 | 10    | PVA<6/12 | AMR  | Canada     | Use                          | 25543/29666 | 86.1%   | Total participants                                |                 |
| Nangia et al, 2013[176]  | Central India Eye and Medical Study                               | Cross-sectional | Clinical; Self-report | 30-100 | 4711  | 9 [2] | PVA<6/12 | SEAR | India      | Unmet                        | 729/1084    | 67.3%   | Total with functional difficulty                  |                 |
| Abdullah et al, 2015[62] | None                                                              | Cross-sectional | Clinical; Self-report | 30+    | 917   | 9 [2] | PVA<6/12 | EMR  | Pakistan   | Uncorrected refractive error | 199/917     | 21.7%   | Total participants                                |                 |
| Bourne et al, 2004[177]  | National Blindness and Low Vision Prevalence Survey of Bangladesh | Cross-sectional | Clinical; Self-report | 30+    | 11624 | 10    | VA<6/12  | SEAR | Bangladesh | Coverage                     | 282/1117    | 25.2%   | Total with need                                   |                 |
|                          |                                                                   |                 |                       |        |       |       |          |      |            | Met                          | 282/1117    | 25.2%   | Total with need                                   |                 |

|                           |                    |                 |                       |     |       |       |             |      |               |          |         |          |                                  |                 |
|---------------------------|--------------------|-----------------|-----------------------|-----|-------|-------|-------------|------|---------------|----------|---------|----------|----------------------------------|-----------------|
|                           |                    |                 |                       |     |       |       |             |      |               |          | Unmet   | 835/1117 | 74.8%                            | Total with need |
| Laitinen et al, 2008[178] | Health 2000 Survey | Cross-sectional | Clinical; Self-report | 30+ | 6645  | 10    | VA<6/24     | EUR  | Finland       | Use      | 103/147 | 70.1%    | Total with functional difficulty |                 |
| Han et al, 2019[179]      | None               | Cohort          | Clinical              | 35+ | 1427  | 10    | PVA<6/12    | WPR  | China         | Coverage | 139/327 | 42.5%    | Total with need                  |                 |
|                           |                    |                 |                       |     |       |       |             |      |               | Met      | 139/327 | 42.5%    | Total with need                  |                 |
|                           |                    |                 |                       |     |       |       |             |      |               | Unmet    | 188/327 | 57.5%    | Total with need                  |                 |
| He et al, 2012[64]        | None               | Cross-sectional | Clinical              | 35+ | 17734 | 9 [4] | UCNVA<=6/12 | AFR  | Niger         | Use      | 12/869  | 1.4%     | Total with functional difficulty |                 |
|                           |                    |                 |                       |     |       |       |             |      | South Africa  | Use      | 66/1687 | 3.9%     | Total with functional difficulty |                 |
|                           |                    |                 |                       |     |       |       |             | AMR  | United States | Use      | 243/476 | 51.1%    | Total with functional difficulty |                 |
|                           |                    |                 |                       |     |       |       |             | SEAR | India         | Use      | 88/2169 | 4.1%     | Total with functional difficulty |                 |
|                           |                    |                 |                       |     |       |       |             |      | Nepal         | Use      | 44/1448 | 3.0%     | Total with                       |                 |

|                               |      |                     |                          |     |       |             |                |     |                          |                                        |           |       |  |                                               |
|-------------------------------|------|---------------------|--------------------------|-----|-------|-------------|----------------|-----|--------------------------|----------------------------------------|-----------|-------|--|-----------------------------------------------|
|                               |      |                     |                          |     |       |             |                |     |                          |                                        |           |       |  | functiona<br>l<br>difficulty                  |
|                               |      |                     |                          |     |       |             |                | WPR | China<br>(Guangzh<br>ou) | Use                                    | 124/1101  | 11.3% |  | Total<br>with<br>functiona<br>l<br>difficulty |
|                               |      |                     |                          |     |       |             |                |     | China<br>(Shunyi)        | Use                                    | 10/2435   | 0.4%  |  | Total<br>with<br>functiona<br>l<br>difficulty |
| He et al,<br>2014<br>(a)[65]  | None | Cohort              | Clinical;<br>Self-report | 35+ | 10553 | 9 [4]       | VA<=6/12       | AFR | Niger                    | Met                                    | 23/144    | 16.0% |  | Total<br>with<br>functiona<br>l<br>difficulty |
|                               |      |                     |                          |     |       |             |                |     | South<br>Africa          | Met                                    | 170/425   | 40.0% |  | Total<br>with<br>functiona<br>l<br>difficulty |
|                               |      |                     |                          |     |       |             |                | AMR | United<br>States         | Met                                    | 141/147   | 95.9% |  | Total<br>with<br>functiona<br>l<br>difficulty |
| Hookway<br>et al,<br>2016[66] | None | Cross-<br>sectional | Clinical;<br>Self-report | 35+ | 3390  | 8 [4,<br>9] | UCVA<=6/1<br>2 | AMR | Nicaragua                | Met                                    | 23/326    | 7.1%  |  | Total<br>with AP                              |
|                               |      |                     |                          |     |       |             |                |     |                          | Uncorrec<br>ted<br>refractive<br>error | 1070/1836 | 58.3% |  | Total<br>participa<br>nts                     |
|                               |      |                     |                          |     |       |             |                |     |                          | Use                                    | 1256/3390 | 37.1% |  | Total<br>participa<br>nts                     |



|                           |                    |                 |                       |     |       |          |          |      |         |                              |            |       |                                  |
|---------------------------|--------------------|-----------------|-----------------------|-----|-------|----------|----------|------|---------|------------------------------|------------|-------|----------------------------------|
| Budenz et al, 2012[180]   | Tema Eye Survey    | Cross-sectional | Clinical              | 40+ | 5603  | 8 [1, 7] | PVA<6/12 | AFR  | Ghana   | Uncorrected refractive error | 608/5603   | 10.9% | Total participants               |
| Casson et al, 2007[181]   | Meiktila Eye Study | Cross-sectional | Clinical              | 40+ | 2076  | 10       | PVA<6/18 | SEAR | Myanmar | Uncorrected refractive error | 254/1348   | 18.8% | Total with functional difficulty |
|                           |                    |                 |                       |     |       |          |          |      |         | Use                          | 3/2076     | 0.1%  | Total participants               |
| Ezelum et al, 2011[182]   | None               | Cross-sectional | Clinical; Self-report | 40+ | 13599 | 10       | VA<6/12  | AFR  | Nigeria | Met                          | 43/1279    | 3.4%  | Total with need                  |
|                           |                    |                 |                       |     |       |          |          |      |         | Need                         | 1279/13599 | 9.4%  | Total participants               |
|                           |                    |                 |                       |     |       |          |          |      |         | Unmet                        | 1236/1279  | 96.6% | Total with need                  |
|                           |                    |                 |                       |     |       |          |          |      |         | Use                          | 44/1279    | 3.4%  | Total with need                  |
| Gupta et al, 2015[72]     | RAVI               | Cross-sectional | Clinical; Self-report | 40+ | 2331  | 10       | PVA<6/18 | SEAR | India   | Uncorrected refractive error | 317/2331   | 13.6% | Total with functional difficulty |
|                           |                    |                 |                       |     |       |          |          |      |         | Use                          | 468/2331   | 20.1% | Total participants               |
| Marmamula et al, 2012[76] | RAVI               | Cross-sectional | Clinical; Self-report | 40+ | 1700  | 9 [4]    | PVA<6/18 | SEAR | India   | Coverage                     | 71/250     | 28.4% | Total with need                  |
|                           |                    |                 |                       |     |       |          |          |      |         | Met                          | 71/1560    | 4.6%  | Total participants               |

|                                |      |                 |                       |     |      |       |           |      |       |                              |           |          |                                  |                    |
|--------------------------------|------|-----------------|-----------------------|-----|------|-------|-----------|------|-------|------------------------------|-----------|----------|----------------------------------|--------------------|
|                                |      |                 |                       |     |      |       |           |      |       |                              | Unmet     | 179/1560 | 11.5%                            | Total participants |
| Marmamula et al, 2014[78]      | RAVI | Cross-sectional | Clinical; Self-report | 40+ | 7378 | 9 [4] | UCVA<6/12 | SEAR | India | Coverage                     | 361/951   | 38.0%    | Total with need                  |                    |
|                                |      |                 |                       |     |      |       |           |      |       | Met                          | 361/7378  | 4.9%     | Total participants               |                    |
|                                |      |                 |                       |     |      |       |           |      |       | Undermet                     | 1001/2174 | 46.0%    | Total with AP                    |                    |
|                                |      |                 |                       |     |      |       |           |      |       | Unmet                        | 590/7378  | 8.0%     | Total participants               |                    |
|                                |      |                 |                       |     |      |       |           |      |       | Use                          | 2174/7378 | 29.5%    | Total participants               |                    |
| Marmamula et al, 2016 (a)[95]  | RAVI | Cross-sectional | Clinical              | 40+ | 6150 | 10    | PVA<6/18  | SEAR | India | Uncorrected refractive error | 94/741    | 12.7%    | Total with functional difficulty |                    |
| Marmamula et al, 2016 (b)[183] | RAVI | Cross-sectional | Clinical              | 40+ | 7378 | 10    | PVA<6/18  | SEAR | India | Uncorrected refractive error | 321/730   | 44.0%    | Total with functional difficulty |                    |
| Marmamula et al, 2017 (b)[184] | None | Cross-sectional | Clinical; Self-report | 40+ | 5881 | 10    | PVA<6/18  | SEAR | India | Coverage                     | 271/506   | 53.6%    | Total with need                  |                    |
|                                |      |                 |                       |     |      |       |           |      |       | Met                          | 271/5881  | 4.6%     | Total participants               |                    |
|                                |      |                 |                       |     |      |       |           |      |       | Unmet                        | 235/5881  | 4.0%     | Total participants               |                    |
|                                |      |                 |                       |     |      |       |           |      |       | Use                          | 1694/5881 | 28.8%    | Total participants               |                    |

|                               |                          |                 |                       |     |       |       |          |      |                  |                              |              |       |                                  | nts |
|-------------------------------|--------------------------|-----------------|-----------------------|-----|-------|-------|----------|------|------------------|------------------------------|--------------|-------|----------------------------------|-----|
| Marmamula et al, 2020(a)[185] | None                     | Cross-sectional | Clinical; Self-report | 40+ | 10280 | 10    | PVA<6/18 | SEAR | India (Khammam)  | Coverage                     | Not provided | 26.9% | Total need (2011-12)             |     |
|                               |                          |                 |                       |     |       |       |          |      | India (Khammam)  | Coverage                     | Not provided | 35.6% | Total need (2017)                |     |
|                               |                          |                 |                       |     |       |       |          |      | India (Khammam)  | Use                          | 697/2485     | 28.0% | Total participants (2011-12)     |     |
|                               |                          |                 |                       |     |       |       |          |      | India (Khammam)  | Use                          | 945/2711     | 34.9% | Total participants (2017)        |     |
|                               |                          |                 |                       |     |       |       |          |      | India (Warangal) | Coverage                     | Not provided | 43.8% | Total need (2011-12)             |     |
|                               |                          |                 |                       |     |       |       |          |      | India (Warangal) | Coverage                     | Not provided | 35.7% | Total need (2017)                |     |
|                               |                          |                 |                       |     |       |       |          |      | India (Warangal) | Use                          | 793/2438     | 32.5% | Total participants (2011-12)     |     |
|                               |                          |                 |                       |     |       |       |          |      | India (Warangal) | Use                          | 769/2646     | 29.1% | Total participants (2017)        |     |
| Marmamula et al, 2020(b)[186] | RAVI; Tripura Eye Survey | Cross-sectional | Clinical              | 40+ | 4109  | 9 [8] | PVA<6/12 | SEAR | India            | Uncorrected refractive error | 159/402      | 39.6% | Total with functional difficulty |     |

|                         |                                                          |                 |                       |       |       |          |             |      |             |                                  |           |       |                                  |
|-------------------------|----------------------------------------------------------|-----------------|-----------------------|-------|-------|----------|-------------|------|-------------|----------------------------------|-----------|-------|----------------------------------|
| Prema et al, 2008[187]  | Chennai Glaucoma Study                                   | Cross-sectional | Clinical; Self-report | 40+   | 7773  | 9 [1]    | VA<6/12     | SEAR | India       | Use                              | 2728/5651 | 48.3% | Total participants               |
| Ramke et al, 2007[80]   | RACSS                                                    | Cross-sectional | Clinical; Self-report | 40+   | 1414  | 10       | PVA<6/18    | SEAR | Timor-Leste | Met                              | 31/1414   | 2.2%  | Total participants               |
|                         |                                                          |                 |                       |       |       |          |             |      |             | Uncorrected refractive error     | 159/1414  | 11.2% | Total participants               |
|                         |                                                          |                 |                       |       |       |          |             |      |             | Undermet                         | 7/1414    | 0.5%  | Total participants               |
|                         |                                                          |                 |                       |       |       |          |             |      |             | Unmet                            | 166/1414  | 11.7% | Total participants               |
|                         |                                                          |                 |                       |       |       |          |             |      |             | Use                              | 214/1414  | 15.1% | Total participants               |
| Tafida et al, 2015[188] | Nigerian National Blindness and Visual Impairment Survey | Cross-sectional | Clinical; Self-report | 40+   | 13591 | 9 [8]    | PVA<6/12    | AFR  | Nigeria     | Coverage                         | 12/374    | 3.2%  | Total with functional difficulty |
| Zheng et al, 2011[189]  | Singapore Malay Eye Study                                | Cross-sectional | Clinical              | 40+   | 3400  | 8 [4, 9] | PVA<6/12    | WPR  | Singapore   | Under-corrected refractive error | 328/565   | 58.1% | Total with functional difficulty |
| Pan et al, 2016[190]    | Weitang Geriatric Diseases Study                         | Cross-sectional | Clinical; Self-report | 60-93 | 4611  | 9 [2]    | PVA<6/18    | WPR  | China       | Uncorrected refractive error     | 224/481   | 46.6% | Total with functional difficulty |
| Cunha et al, 2018[81]   | None                                                     | Cross-sectional | Clinical              | 45+   | 2041  | 9 [1]    | UCNVA<=6/18 | AMR  | Brazil      | Use                              | 480/2025  | 23.7% | Total participants               |

|                               |                                       |                 |                       |     |       |       |          |      |                  |                              |           |       |                                  |
|-------------------------------|---------------------------------------|-----------------|-----------------------|-----|-------|-------|----------|------|------------------|------------------------------|-----------|-------|----------------------------------|
| Furtado et al, 2019[191]      | Brazilian Amazon Region Eye Survey    | Cross-sectional | Clinical              | 45+ | 2041  | 10    | VA<6/9.5 | AMR  | Brazil           | Need                         | 1384/1963 | 70.5% | Total with functional difficulty |
| Bastawros et al, 2013[192]    | RAAB                                  | Cross-sectional | Clinical; Self-report | 50+ | 4414  | 10    | PVA<6/12 | AFR  | Kenya            | Coverage                     | 122/478   | 25.5% | Total with functional difficulty |
|                               |                                       |                 |                       |     |       |       |          |      |                  | Met                          | 122/478   | 25.5% | Total with functional difficulty |
|                               |                                       |                 |                       |     |       |       |          |      |                  | Unmet                        | 356/478   | 74.5% | Total with functional difficulty |
| Gallarreta et al, 2014[193]   | RAAB                                  | Cross-sectional | Clinical              | 50+ | 3729  | 9 [4] | PVA<6/18 | AMR  | Uruguay          | Uncorrected refractive error | 177/3729  | 4.7%  | Total participants               |
| Lee et al, 2019[194]          | RAAB                                  | Cross-sectional | Clinical; Self-report | 50+ | 5000  | 9 [4] | VA<6/12  | WPR  | Papua New Guinea | Uncorrected refractive error | 207/284   | 72.9% | Total with functional difficulty |
| Marmamula et al, 2013(c)[195] | Rapid Assessment of Visual Impairment | Cross-sectional | Clinical              | 50+ | 494   | 10    | PVA<6/18 | SEAR | India            | Uncorrected refractive error | 74/280    | 26.4% | Total with functional difficulty |
| Neena et al, 2008[196]        | RAAB                                  | Cross-sectional | Clinical              | 50+ | 40447 | 9 [4] | PVA<6/12 | SEAR | India            | Uncorrected refractive error | 2233/6786 | 32.9% | Total with functional difficulty |

|                                |                                  |                           |                             |     |      |       |          |      |               |                                  |           |       |                                  |
|--------------------------------|----------------------------------|---------------------------|-----------------------------|-----|------|-------|----------|------|---------------|----------------------------------|-----------|-------|----------------------------------|
| Nirmalan et al, 2002[197]      | None                             | Cross-sectional           | Clinical                    | 50+ | 5795 | 10    | PVA<6/18 | SEAR | India         | Uncorrected refractive error     | 348/1768  | 19.7% | Total with functional difficulty |
|                                |                                  |                           |                             |     |      |       |          |      |               | Use                              | 536/54111 | 1.0%  | Total participants               |
| Patil et al, 2014[198]         | RAAB                             | Cross-sectional           | Clinical; Self-report       | 50+ | 2747 | 9 [4] | PVA<6/12 | SEAR | India         | Use                              | 1284/2737 | 46.9% | Total participants               |
| Dwarakanathan et al, 2019[199] | None                             | Cross-sectional           | Clinical; Self-report       | 60+ | 555  | 9 [4] | PVA<6/18 | SEAR | India         | Uncorrected refractive error     | 50/136    | 36.8% | Total with functional difficulty |
| Zhu et al, 2013[200]           | BaoShan Eye Study                | Cross-sectional           | Clinical; Self-report       | 60+ | 4545 | 9 [4] | PVA<6/12 | WPR  | China         | Coverage                         | 473/1072  | 44.1% | Total with need                  |
|                                |                                  |                           |                             |     |      |       |          |      |               | Met                              | 473/4545  | 10.4% | Total participants               |
|                                |                                  |                           |                             |     |      |       |          |      |               | Under-corrected refractive error | 1129/4545 | 24.8% | Total participants               |
|                                |                                  |                           |                             |     |      |       |          |      |               | Under-met                        | 98/599    | 16.4% | Total with functional difficulty |
|                                |                                  |                           |                             |     |      |       |          |      |               | Unmet                            | 599/4545  | 13.2% | Total participants               |
| Choi et al, 2018[201]          | National Health Interview Survey | Secondary cross-sectional | Single-question self-report | 65+ | 3058 | 10    | RAL      | AMR  | United States | Use                              | 812/3058  | 26.6% | Total with functional difficulty |

|                        |                                        |                           |                       |     |      |    |             |     |               |          |                   |         |                    |
|------------------------|----------------------------------------|---------------------------|-----------------------|-----|------|----|-------------|-----|---------------|----------|-------------------|---------|--------------------|
| Kuang et al, 2007[202] | Shihpai Eye Study                      | Cross-sectional           | Clinical              | 65+ | 1361 | 10 | VA<=6/12    | WPR | Taiwan        | Met      | 314/1330          | 23.6%   | Total participants |
|                        |                                        |                           |                       |     |      |    |             |     |               | Undermet | 13/1330           | 1.0%    | Total participants |
|                        |                                        |                           |                       |     |      |    |             |     |               | Unmet    | 114/1330          | 8.6%    | Total participants |
| Otte et al, 2018[84]   | National Health and Aging Trends Study | Secondary cross-sectional | Self-report           | 65+ | 7497 | 10 | RAL; AP Use | AMR | United States | Use      | 40500000/43900000 | 92.3%   | Total population   |
| Dupraz et al, 2020[40] | 5-COOP                                 | Cross-sectional           | Clinical; Self-report | 100 | 1253 | 10 | AP use      | EUR | Denmark       | Has AP   | 196/251           | 78.1%   | Total participants |
|                        |                                        |                           |                       |     |      |    |             |     | France        | Has AP   | 247/282           | 87.6%   | Total participants |
|                        |                                        |                           |                       |     |      |    |             |     | Sweden        | Has AP   | 233/274           | 85.0%   | Total participants |
|                        |                                        |                           |                       |     |      |    |             |     | Switzerland   | Has AP   | 124/170           | 72.9%   | Total participants |
|                        |                                        |                           |                       |     |      |    |             |     | WPR           | Japan    | Has AP            | 226/346 | 65.3%              |

ATA-N=Assistive Technology Assessment-Needs. RAAB=Rapid Assessment of Avoidable Blindness. RAD=Rapid Assessment of Disability. RACSS=Rapid Assessment of Cataract Surgical Services. RARE=Rapid Assessment of Refractive Error. RAVI=Rapid Assessment of Visual Impairment. WGQ=Washington Group Questions. RAL=self-reported activity limitations. RE=refractive error. VA=visual acuity. PVA=presenting visual acuity. UCVA=uncorrected visual acuity. DVA=distance visual acuity. NVA=near visual acuity. PNVA=presenting near visual acuity. UCNVA=uncorrected near visual acuity.

\*Results are presented in millions

Appendix 11: Grouped and Cognitive AP Indicators

| AP Type                            | Citation                  | Tool, Survey, or Dataset                         | Study Design              | Approaches  | Ages  | Participants | JBI Score | Functional Difficulty Threshold | WHO Region | Country  | AP access Indicator |             |       |                                  |
|------------------------------------|---------------------------|--------------------------------------------------|---------------------------|-------------|-------|--------------|-----------|---------------------------------|------------|----------|---------------------|-------------|-------|----------------------------------|
|                                    |                           |                                                  |                           |             |       |              |           |                                 |            |          | Indicator           | Calculation | (%)   | Denominator                      |
| Personal Digital Assistants (PDAs) | Lindsay et al, 2010[203]  | Participation and Activity Limitation Survey     | Secondary cross-sectional | Self-report | 15-24 | 15817        | 10        | RAL                             | AMR        | Canada   | Unmet               | 2305/15817  | 14.6% | Total with functional difficulty |
|                                    |                           |                                                  |                           |             |       |              |           |                                 |            |          | Use                 | 1323/15817  | 8.4%  | Total with functional difficulty |
| Grouped APs                        | Lindsay et al, 2010[203]  | Participation and Activity Limitation Survey     | Secondary cross-sectional | Self-report | 15-24 | 15817        | 10        | RAL                             | AMR        | Canada   | Unmet               | 4710/15817  | 29.8% | Total with functional difficulty |
|                                    |                           |                                                  |                           |             |       |              |           |                                 |            |          | Use                 | 14494/15817 | 91.6% | Total with functional difficulty |
|                                    | Rios et al, 2014[17]      | Assistive Technology Banks (BAT) Client Database | Secondary cross-sectional | Clinical    | 0-100 | 839          | 8 [2, 10] | AP use                          | AMR        | Colombia | Has AP              | 245/839     | 29.2% | Total participants               |
|                                    | Eide et al, 2003 (a)[204] | Living Conditions Studies                        | Cross-sectional           | Self-report | 0+    | 12323        | 10        | RAL                             | AFR        | Zimbabwe | Use                 | 506/1961    | 25.8% | Total with functional difficulty |
|                                    | Eide et al, 2003 (b)[205] | Living Conditions Studies                        | Cross-sectional           | Self-report | 0+    | 16429        | 9 [8]     | RAL                             | AFR        | Namibia  | Use                 | 446/2537    | 17.6% | Total with functional difficulty |
|                                    | Eide et al, 2006[206]     | WGQ Short set; Living Conditions Studies         | Cross-sectional           | Self-report | 0+    | 28189        | 9 (4)     | RAL                             | AFR        | Zambia   | Use                 | 372/2856    | 13.0% | Total with functional difficulty |
|                                    | Eide et al, 2016[207]     | WGQ Short set; Living Conditions Studies         | Cross-sectional           | Self-report | 0+    | 4123         | 8 [2, 4]  | RAL                             | SEAR       | Nepal    | Use                 | 234/2000    | 11.7% | Total with functional difficulty |



|                           |                                                                         |                 |             |    |        |             |     |     |              |        |          |       |                                  |
|---------------------------|-------------------------------------------------------------------------|-----------------|-------------|----|--------|-------------|-----|-----|--------------|--------|----------|-------|----------------------------------|
| Eide et al, 2018[208]     | WGQ Short set; Living Conditions Studies                                | Cross-sectional | Self-report | 0+ | 129988 | 9 [4]       | RAL | AFR | Malawi       | Use    | 196/4350 | 4.5%  | Total with functional difficulty |
| Eide et al, 2011[209]     | Living Conditions Studies                                               | Cross-sectional | Self-report | 0+ | 8734   | 9 [4]       | RAL | AFR | Swaziland    | Use    | 186/866  | 21.5% | Total with functional difficulty |
| Eide et al, 2009[210]     | Living Conditions Studies                                               | Cross-sectional | Self-report | 0+ | 11401  | 9 [4]       | RAL | AFR | Mozambique   | Use    | 107/537  | 19.9% | Total with functional difficulty |
| Eide et al, 2016[211]     | WGQ Short set; Living Conditions Studies                                | Cross-sectional | Self-report | 0+ | 9904   | 9 [4]       | RAL | AFR | Botswana     | Use    | 348/955  | 36.4% | Total with functional difficulty |
| Kamaleri et al, 2011[212] | WGQ Short set; Living Conditions Studies                                | Cross-sectional | Self-report | 0+ | 5894   | 9 [4]       | RAL | AFR | Lesotho      | Use    | 86/619   | 13.9% | Total with functional difficulty |
| Loeb et al, 2004[213]     | Living Conditions Studies                                               | Cross-sectional | Self-report | 0+ | 15364  | 10          | RAL | AFR | Malawi       | Use    | 304/1550 | 19.6% | Total with functional difficulty |
| Maart Jelsma 2013[214]    | WGQ Short set                                                           | Cross-sectional | Self-report | 0+ | 3464   | 8 [4, 8]    | RAL | AFR | South Africa | Need   | 110/3464 | 3.2%  | Total participants               |
|                           |                                                                         |                 |             |    |        |             |     |     |              | Unmet  | 38/110   | 34.5% | Total with need                  |
| Smith, 2011[215]          | None                                                                    | Cross-sectional | Self-report | 0+ | 1093   | 7 [2, 4, 7] | RAL | AFR | Nigeria      | Has AP | 403/1093 | 37.0% | Total with functional difficulty |
|                           |                                                                         |                 |             |    |        |             |     |     |              | Use    | 260/1093 | 23.8% | Total with functional difficulty |
| Eide et al, 2018[216]     | WGQ Child Functioning Module; WGQ Short set; Living Conditions Studies; | Cross-sectional | Self-report | 2+ | 9190   | 9 [8]       | RAL | AFR | Zambia       | Use    | 459/2294 | 20.0% | Total with functional difficulty |

|                          |                                                     |       |                           |                       |        |        |           |        |     |               |       |              |       |                                  |  |
|--------------------------|-----------------------------------------------------|-------|---------------------------|-----------------------|--------|--------|-----------|--------|-----|---------------|-------|--------------|-------|----------------------------------|--|
|                          | National Disability Survey                          |       |                           |                       |        |        |           |        |     |               |       |              |       |                                  |  |
| Danquah et al, 2013[25]  | WGQ set                                             | Short | Mixed-methods             | Self-report           | 5+     | 3122   | 10        | RAL    | AMR | Haiti         | Need  | 54/178       | 30.3% | Total with functional difficulty |  |
|                          |                                                     |       |                           |                       |        |        |           |        |     |               | Unmet | 37/178       | 20.8% | Total with functional difficulty |  |
|                          |                                                     |       |                           |                       |        |        |           |        |     |               | Use   | 17/178       | 9.6%  | Total with functional difficulty |  |
| Visagie et al, 2017[217] | WGQ set                                             | Short | Cross-sectional           | Self-report           | 5+     | 4388   | 8 [4, 8]  | RAL    | AFR | Malawi        | Use   | 42/1496      | 2.8%  | Total with functional difficulty |  |
|                          |                                                     |       |                           |                       |        |        |           |        |     | Namibia       | Use   | 331/1118     | 29.6% | Total with functional difficulty |  |
|                          |                                                     |       |                           |                       |        |        |           |        |     | South Africa  | Use   | 199/1050     | 19.0% | Total with functional difficulty |  |
|                          |                                                     |       |                           |                       |        |        |           |        | EMR | Sudan         | Use   | 142/724      | 19.6% | Total with functional difficulty |  |
| Loggins et al, 2013[218] | National Behavioral Risk Factor Surveillance System |       | Secondary cross-sectional | Self-report           | 18-99  | 393949 | 8 [4, 10] | AP use | AMR | United States | Use   | 38499/393949 | 9.8%  | Total participants               |  |
| Marella et al, 2016[219] | RAD                                                 |       | Cross-sectional           | Clinical; Self-report | 18-100 | 2139   | 10        | AP use | WPR | Philippines   | Met   | 120/265      | 45.3% | Total with functional difficulty |  |
|                          |                                                     |       |                           |                       |        |        |           |        |     |               | Unmet | 51/265       | 19.2% | Total with functional difficulty |  |
| Berardi et al, 2020[27]  | Canadian Survey on Disability                       | on    | Secondary cross-sectional | Self-report           | 15+    | 45443  | 10        | RAL    | AMR | Canada        | Unmet | 1.0/3.8*     | 26.6% | Total with functional difficulty |  |

|                          |                                          |                           |                         |     |      |             |     |      |               |              |           |       |                                  |       |                                  |
|--------------------------|------------------------------------------|---------------------------|-------------------------|-----|------|-------------|-----|------|---------------|--------------|-----------|-------|----------------------------------|-------|----------------------------------|
|                          |                                          |                           |                         |     |      |             |     |      |               |              |           | Use   | 3.6/3.8*                         | 94.8% | Total with functional difficulty |
| Matter et al, 2018[220]  | WGQ Short set; Living Conditions Studies | Secondary cross-sectional | Self-report             | 15+ | 818  | 7 [2, 3, 9] | RAL | AFR  | Botswana      | Met          | 272/486   | 56.0% | Total with need                  |       |                                  |
|                          |                                          |                           |                         |     |      |             |     |      |               | Unmet        | 214/486   | 44.0% | Total with need                  |       |                                  |
|                          |                                          |                           |                         |     |      |             |     |      | Swaziland     | Met          | 104/332   | 31.3% | Total with need                  |       |                                  |
|                          |                                          |                           |                         |     |      |             |     |      |               | Unmet        | 222/332   | 66.9% | Total with need                  |       |                                  |
| Pryor et al, 2018[30]    | ATA-N, RAD, WGQ                          | Cross-sectional           | Self-report             | 18+ | 4253 | 9 [4]       | RAL | SEAR | Bangladesh    | Met          | 227/302   | 75.2% | Total with AP                    |       |                                  |
|                          |                                          |                           |                         |     |      |             |     |      |               | Under-met    | 75/1356   | 5.5%  | Total with functional difficulty |       |                                  |
|                          |                                          |                           |                         |     |      |             |     |      |               | Unmet        | 1013/1356 | 74.7% | Total with functional difficulty |       |                                  |
|                          |                                          |                           |                         |     |      |             |     |      |               | Use          | 302/4250  | 7.1%  | Total participants               |       |                                  |
| Goins et al, 2010[221]   | Native Elder Care Study                  | Cross-sectional           | Functional; Self-report | 55+ | 505  | 9 [4]       | RAL | AMR  | United States | Use          | 127/505   | 25.1% | Total participants               |       |                                  |
| Frochen et al, 2017[222] | National Health and Aging Trends Study   | Secondary cross-sectional | Self-report             | 65+ | 7521 | 10          | RAL | AMR  | United States | Use (Indoor) | 489/7521  | 6.5%  | Total participants               |       |                                  |

ATA-N=Assistive Technology Assessment-Needs. RAD=Rapid Assessment of Disability. WGQ=Washington Group Questions. RAL=self-reported activity limitations.

\*Results are presented in millions.

Appendix 12: Need Indicators: Grouped/Unspecified Glasses

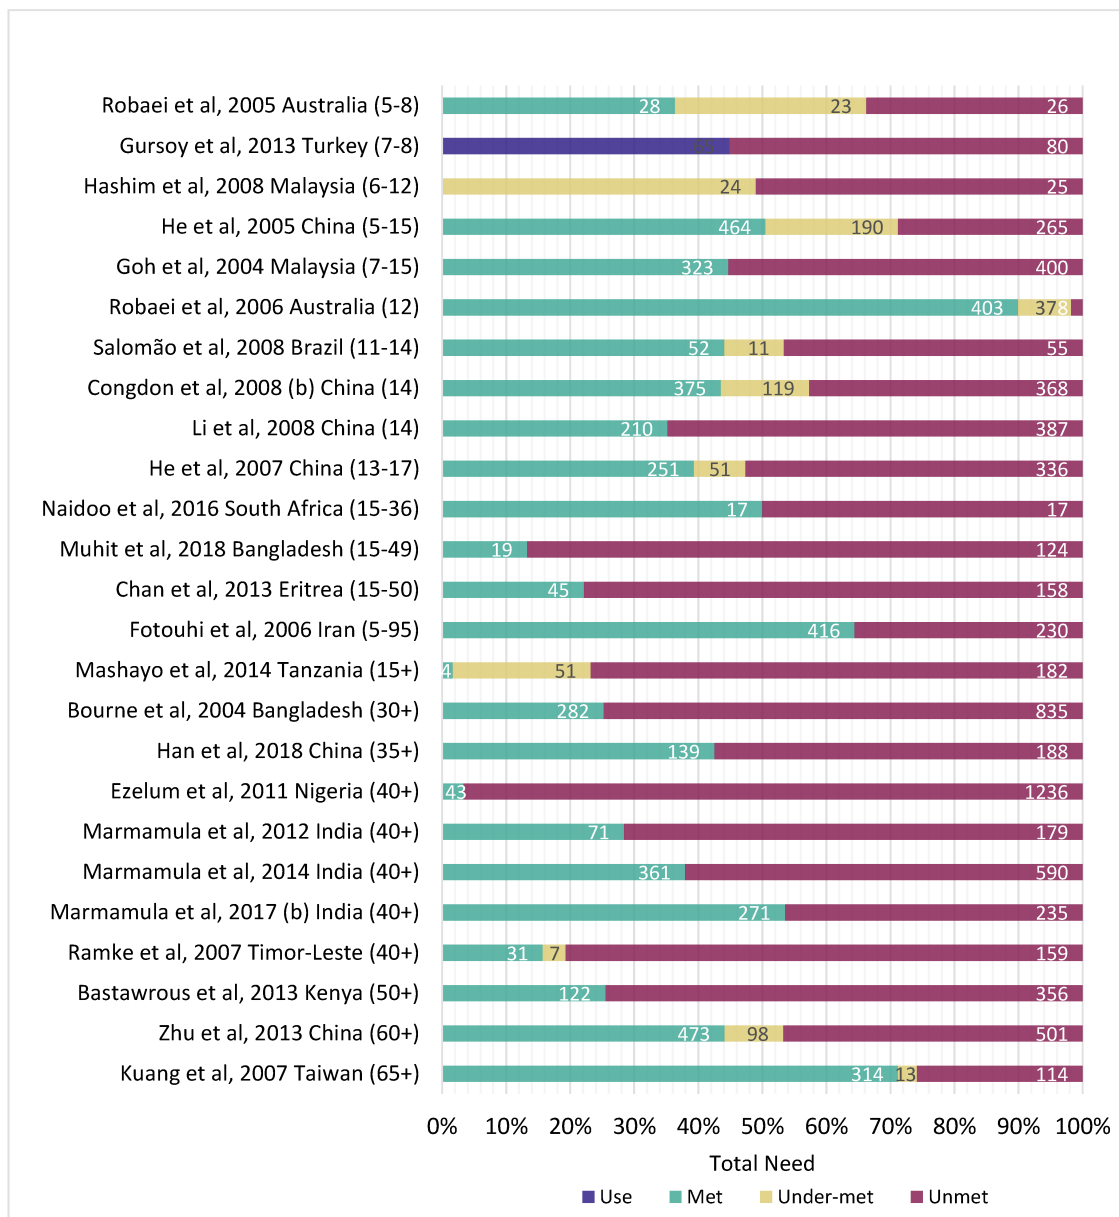

Supplement: bmjgh-2021-007662supp001.pdf [file bmjgh-2021-007662supp001.pdf]
